# Supplementary material for: Impact of the Nutri-Score front-of-pack nutrition label on purchasing intentions of individuals with chronic diseases: results of a randomised trial
Source: PubMed Central journal article supplement — BMJ Open. 2022 Aug 29;12(8):e058139. doi: 10.1136/bmjopen-2021-058139 (PMC9438084; doi:10.1136/bmjopen-2021-058139), 2022-08-29
Supplement: bmjopen-2021-058139.draft_revisions.pdf [file bmjopen-2021-058139.draft_revisions.pdf]

# BMJ Open

BMJ Open is committed to open peer review. As part of this commitment we make the peer review history of every article we publish publicly available.

When an article is published we post the peer reviewers' comments and the authors' responses online. We also post the versions of the paper that were used during peer review. These are the versions that the peer review comments apply to.

The versions of the paper that follow are the versions that were submitted during the peer review process. They are not the versions of record or the final published versions. They should not be cited or distributed as the published version of this manuscript.

BMJ Open is an open access journal and the full, final, typeset and author-corrected version of record of the manuscript is available on our site with no access controls, subscription charges or pay-per-view fees (<http://bmjopen.bmj.com>).

If you have any questions on BMJ Open's open peer review process please email [info.bmjopen@bmj.com](mailto:info.bmjopen@bmj.com)

# BMJ Open

## Impact of the Nutri-Score front-of-pack nutrition label on purchasing intentions of individuals with chronic diseases: results of a randomized trial

|                               |                                                                                                                                                                                                                                                                                                                                                                                                                                                                                                                                                                                                                                                                                                                                                                                                                                                                                                                                                                                                                                                                                                                                                                                                                 |
|-------------------------------|-----------------------------------------------------------------------------------------------------------------------------------------------------------------------------------------------------------------------------------------------------------------------------------------------------------------------------------------------------------------------------------------------------------------------------------------------------------------------------------------------------------------------------------------------------------------------------------------------------------------------------------------------------------------------------------------------------------------------------------------------------------------------------------------------------------------------------------------------------------------------------------------------------------------------------------------------------------------------------------------------------------------------------------------------------------------------------------------------------------------------------------------------------------------------------------------------------------------|
| Journal:                      | <i>BMJ Open</i>                                                                                                                                                                                                                                                                                                                                                                                                                                                                                                                                                                                                                                                                                                                                                                                                                                                                                                                                                                                                                                                                                                                                                                                                 |
| Manuscript ID                 | bmjopen-2021-058139                                                                                                                                                                                                                                                                                                                                                                                                                                                                                                                                                                                                                                                                                                                                                                                                                                                                                                                                                                                                                                                                                                                                                                                             |
| Article Type:                 | Original research                                                                                                                                                                                                                                                                                                                                                                                                                                                                                                                                                                                                                                                                                                                                                                                                                                                                                                                                                                                                                                                                                                                                                                                               |
| Date Submitted by the Author: | 18-Oct-2021                                                                                                                                                                                                                                                                                                                                                                                                                                                                                                                                                                                                                                                                                                                                                                                                                                                                                                                                                                                                                                                                                                                                                                                                     |
| Complete List of Authors:     | Egnell, Manon; Equipe de Recherche en Epidémiologie Nutritionnelle<br>Boutron, Isabelle; Université de Paris<br>Péneau, Sandrine; Université Paris 13 - Campus de Bobigny, Equipe de Recherche en Epidémiologie Nutritionnelle<br>Ducrot, Pauline; Santé publique France<br>Touvier, Mathilde; Université Paris 13, Equipe de Recherche en Epidémiologie Nutritionnelle, Centre de Recherche en Epidémiologie et Statistiques, Inserm (U1153), Inra (U1125), Cnam, COMUE Sorbonne Paris Cité,<br>Galan, Pilar; INRA, Equipe de Recherche en Epidémiologie Nutritionnelle<br>Fezeu, Léopold; Université Paris 13 - Campus de Bobigny, Equipe de Recherche en Epidémiologie Nutritionnelle<br>Porcher, Raphaël; Université de Paris<br>Ravaud, Philippe; Université de Paris<br>Hercberg, Serge; Université Paris 13, Equipe de Recherche en Epidémiologie Nutritionnelle (EREN), Centre d'Epidémiologie et Statistiques Sorbonne Paris Cité, Inserm (U1153), Inra (U1125), Cnam, COMUE Sorbonne Paris Cité<br>Kesse-Guyot, Emmanuelle; INRA, Equipe de Recherche en Epidémiologie Nutritionnelle<br>Julia, Chantal; Université Paris 13 - Campus de Bobigny, Equipe de Recherche en Epidémiologie Nutritionnelle |
| Keywords:                     | EPIDEMIOLOGY, Health policy < HEALTH SERVICES ADMINISTRATION & MANAGEMENT, NUTRITION & DIETETICS                                                                                                                                                                                                                                                                                                                                                                                                                                                                                                                                                                                                                                                                                                                                                                                                                                                                                                                                                                                                                                                                                                                |
|                               |                                                                                                                                                                                                                                                                                                                                                                                                                                                                                                                                                                                                                                                                                                                                                                                                                                                                                                                                                                                                                                                                                                                                                                                                                 |

SCHOLARONE™  
Manuscripts

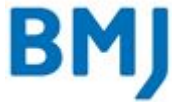

I, the Submitting Author has the right to grant and does grant on behalf of all authors of the Work (as defined in the below author licence), an exclusive licence and/or a non-exclusive licence for contributions from authors who are: i) UK Crown employees; ii) where BMJ has agreed a CC-BY licence shall apply, and/or iii) in accordance with the terms applicable for US Federal Government officers or employees acting as part of their official duties; on a worldwide, perpetual, irrevocable, royalty-free basis to BMJ Publishing Group Ltd ("BMJ") its licensees and where the relevant Journal is co-owned by BMJ to the co-owners of the Journal, to publish the Work in this journal and any other BMJ products and to exploit all rights, as set out in our [licence](#).

The Submitting Author accepts and understands that any supply made under these terms is made by BMJ to the Submitting Author unless you are acting as an employee on behalf of your employer or a postgraduate student of an affiliated institution which is paying any applicable article publishing charge ("APC") for Open Access articles. Where the Submitting Author wishes to make the Work available on an Open Access basis (and intends to pay the relevant APC), the terms of reuse of such Open Access shall be governed by a Creative Commons licence – details of these licences and which [Creative Commons](#) licence will apply to this Work are set out in our licence referred to above.

Other than as permitted in any relevant BMJ Author's Self Archiving Policies, I confirm this Work has not been accepted for publication elsewhere, is not being considered for publication elsewhere and does not duplicate material already published. I confirm all authors consent to publication of this Work and authorise the granting of this licence.

1  
2  
3 **Impact of the Nutri-Score front-of-pack nutrition label on purchasing intentions of**  
4 **individuals with chronic diseases: results of a randomized trial**  
5  
6  
7

8 4 Manon Egnell<sup>1</sup>, PhD, Isabelle Boutron<sup>2</sup>, MD PhD, Sandrine Péneau<sup>1</sup>, PhD, Pauline Ducrot<sup>3</sup>,  
9 PhD, Mathilde Touvier<sup>1</sup>, PhD, Pilar Galan<sup>1</sup>, MD PhD, Léopold K. Fezeu<sup>1</sup>, MD PhD, Raphaël  
10 Porcher<sup>2</sup>, PhD, Philippe Ravaud<sup>2</sup>, MD PhD, Serge Hercberg<sup>1,4</sup>, MD PhD, Emmanuelle Kesse-  
11 Guyot<sup>1</sup>, PhD, Chantal Julia<sup>1,4</sup>, MD PhD  
12  
13  
14  
15  
16  
17  
18  
19

20 **Author's Affiliation:**

21  
22 <sup>1</sup> Sorbonne Paris Nord (Paris 13), CRESS, INSERM, INRAE, Cnam, Nutritional Epidemiology  
23 Research Team (EREN), F-93017 Bobigny, France  
24  
25

26 <sup>2</sup> Université de Paris, CRESS, INSERM, INRAE, F-75004 Paris, France  
27  
28

29 <sup>3</sup> Santé publique France, French national public health agency. F-94415 Saint-Maurice, France  
30  
31

32 <sup>4</sup> Public health department, Avicenne Hospital, AP-HP, Bobigny, France  
33  
34  
35

36 **Corresponding author contact information:** Pr Chantal Julia, EREN, Inserm U1153, SMBH  
37 Paris 13, 74 rue Marcel Cachin, F-93017 Bobigny Cedex, France, c.julia @eren.smbh.univ-  
38 paris13.fr  
39  
40  
41  
42  
43  
44

45 **Word count:** 3500 words  
46  
47  
48  
49  
50  
51  
52  
53  
54  
55  
56  
57  
58  
59  
60

1  
2  
3 22 **ABSTRACT**  
4

5 23 **Objective** : The effect of front-of-pack nutrition labels such as the Nutri-Score on food  
6  
7 24 purchases has never been assessed among individuals suffering from nutrition-related chronic  
8  
9 25 diseases specifically, while dietary modifications are generally part of their care. This study  
10  
11 26 aimed to investigate the effect of the Nutri-Score on the nutritional quality of purchasing  
12  
13 27 intentions among adults suffering from a cardiometabolic disease, compared to no label and the  
14  
15 28 Reference Intakes (RIs), a label already implemented by some food manufacturers in France.  
16  
17

18  
19 29 **Setting**: Secondary prevention – mainland France  
20

21 30 **Participants** : 2,431 eligible participants were randomly assigned and 1,180 participants  
22  
23 31 (65.5% women, mean age 65.0±7.1 years) completed the shopping task and were included in  
24  
25 32 the analyses.  
26  
27

28 33 **Intervention**: A three-arm randomized controlled trial using an experimental online  
29  
30 34 supermarket was conducted in 2017. Participants with cardiometabolic diseases were invited to  
31  
32 35 simulate food purchases with the Nutri-Score, or with the RIs or no label.  
33  
34

35 36 **Primary and secondary outcome measures** : The primary outcome was the nutritional quality  
36  
37 37 of the shopping cart, estimated using the French-modified Food Standard Agency Nutrient  
38  
39 38 Profiling System (FSAm-NPS), and secondary outcomes included the nutrient content of  
40  
41 39 purchases.  
42  
43

44 40 **Results**: The mean (SD) FSAm-NPS score was significantly lower in the Nutri-Score arm  
45  
46 41 (1.29(3.61) points), reflecting a higher overall nutritional quality of purchases, compared to the  
47  
48 42 RIs (1.86(3.23) points) and no label (1.92(2.90) points) arms (p-value=0.01). Moreover, the  
49  
50 43 Nutri-Score led to significantly lower content in calories and saturated fatty acids compared to  
51  
52 44 the two other arms.  
53  
54  
55  
56  
57  
58  
59  
60

1  
2  
3 45 **Conclusions:** The Nutri-Score appears to encourage healthier food choices among individuals  
4  
5 46 suffering from cardiometabolic chronic diseases, for which an improvement of the dietary  
6  
7 47 quality is often part of the treatment.  
8  
9

10 48 **Trial registration :** NCT02769455  
11  
12 49  
13  
14

## 15 50 **Article summary**

16  
17 51 Strengths and limitations of this study

- 18  
19 52 • Inclusion of a rarely explored population in a randomized controlled trial pertaining to  
20  
21 53 the effectiveness of front-of-package labelling on food choices  
22  
23  
24 54 • This controlled experimental environment allowed assessing the effect of the Nutri-  
25  
26 55 Score in standardized conditions and optimizing internal validity of the study.  
27  
28  
29 56 • Limitation pertaining to a high rate of participants who did not complete the shopping  
30  
31 57 task.  
32  
33 58 • The trial investigated purchasing intentions rather than actual food purchases.  
34  
35  
36 59

37  
38 60 **Keywords:** Front-of-pack nutrition label; cardiometabolic diseases; Food purchases;  
39  
40 61 Nutritional quality; Experimental online supermarket  
41  
42  
43  
44  
45  
46  
47  
48  
49  
50  
51  
52  
53  
54  
55  
56  
57  
58  
59  
60

## 62 INTRODUCTION

63  
64 Non-Communicable Diseases (NCDs), such as obesity, type 2 diabetes, cardiovascular diseases  
65 and cancer have become a major burden for the current health systems.[1] For these diseases,  
66 dietary factors have been recognized to be one of the major leading risk factors in developed  
67 countries, resulting in 11 million deaths worldwide in 2017, and represent modifiable  
68 determinants through primary prevention.[2] In France, cardiovascular diseases remain the  
69 second leading cause of deaths by NCDs, accounting for 30% approximately of mortality.[3]  
70 Regarding obesity, the prevalence was estimated at 17% within the French adult population in  
71 2015,[4] and the prevalence of type 2 diabetes was around 5% in 2016.[5]

72  
73 Hence, in the context of secondary or tertiary prevention, many treatment guidelines highlight  
74 the importance to modify dietary habits to improve the nutritional status of individuals and thus  
75 control these nutrition-related NCDs.[1] For example, controlling for Saturated Fatty Acids  
76 (SFA), sugars and salt intakes and increasing fruits and vegetables, pulses, and fibres  
77 consumption are encouraged in the management of several NCDs or risk factors such as obesity,  
78 arterial hypertension and diabetes.[1] Nutritional labelling has been suggested to be an  
79 interesting tool in helping individuals suffering from NCDs achieve balanced nutritional  
80 intakes.[6] However, it has been shown that nutritional information on the back of packages  
81 were poorly understood and used during food choices.[7] While few studies have suggested  
82 that individuals suffering from nutrition-related NCDs would pay more attention to nutritional  
83 information and check for specific nutrients,[8,9] another study has observed no difference of  
84 nutritional information use between patients and individuals with no chronic condition.[6]

85

1  
2  
3 86 In the last decade, Front-of-Pack nutrition Labels (FoPLs) have been identified to improve the  
4  
5 87 nutritional quality of food choices at the point-of-purchase in the general population,[10–19]  
6  
7  
8 88 and to encourage reformulation and innovation of food products.[20,21] In France, the  
9  
10 89 summary FoPL Nutri-Score has been adopted in October 2017 (and then in several European  
11  
12 90 countries) to indicate the nutritional quality of products in supermarkets.[22] By the end of  
13  
14 91 2019, the brands which adopted the Nutri-Score represented approximately 25% of the volume  
15  
16 92 of pre-packed foods sales with more than 300 manufacturers engaged.[23] The Nutri-Score has  
17  
18 93 been demonstrated to be well perceived, understood and to have a positive effect on food  
19  
20 94 purchases in the general French population[14,18,24–27] and students.[28] However, as the  
21  
22 95 measure is implemented on a voluntary basis, it coexists on the French market with the  
23  
24 96 Reference Intakes label (RIs),[29] used by multiple food manufacturers since 2006 in Europe,  
25  
26 97 and the absence of any front-of-pack labelling.  
27  
28  
29  
30  
31  
32

33 99 To our knowledge, no study has specifically investigated the effect of FoPLs, including the  
34  
35 100 Nutri-Score, on food purchases of patients suffering from nutrition-related NCDs only. Thus,  
36  
37 101 the study aimed to determine the effect of the Nutri-Score on purchasing intentions of  
38  
39 102 individuals suffering from nutrition-related cardiometabolic chronic diseases, compared to the  
40  
41 103 current French labelling situations, i.e. the RIs or no FoPL, as a secondary or primary prevention  
42  
43 104 tool.  
44  
45  
46  
47  
48  
49  
50  
51  
52  
53  
54  
55  
56  
57  
58  
59  
60



## 111 **METHODS**

112

### 113 **Trial design and participants**

114 A three-arm parallel group randomized trial was conducted in 2017 targeting individuals  
115 suffering from cardiometabolic NCDs. The study was approved by the Institutional Review  
116 Bard of the INSERM (IRB n°IRB0000388 FWA00005831), the National Commission for Data  
117 Protection and Liberties (CNIL n° 909216) and the *Comité consultatif sur le traitement de*  
118 *l'information en matière de recherche dans le domaine de la santé*, and registered at  
119 <https://clinicaltrials.gov/ct2/show/NCT02769455>. Electronic consent was obtained from each  
120 participant. A methodology similar to a trial targeting students was used.[28]

121

122 Participants were recruited from the NutriNet-Santé cohort by a targeted emailing campaign in  
123 2016, using the following criteria: age, BMI, and the declaration of one of the diseases included  
124 in the present study. Briefly, the NutriNet-Santé is an ongoing web-based prospective  
125 observational cohort study launched in France in May 2009, including adult volunteers  
126 recruited by multi-media campaigns.[30] Each individual who agreed to participate was asked  
127 to fulfil an inclusion questionnaire and provide information on gender, age, occupation,  
128 educational level, household composition, and weekly budget for grocery shopping. They were  
129 also asked to self-estimate their nutrition knowledge level on a 4-point scale (between “I am  
130 very knowledgeable about nutrition” and “I do not know anything about nutrition”), and to  
131 provide information on their grocery shopping frequency in general and online (“Always”,  
132 “Often”, “Sometimes” and “Never”). Finally, they were invited to declare if they had been  
133 diagnosed or were currently under medical supervision for at least one of the following  
134 nutrition-related chronic diseases: obesity, type 2 diabetes, dyslipidaemia, arterial hypertension,

1  
2  
3 135 cardiovascular disease. Thus, individuals involved in grocery shopping, over 50 years old, and  
4  
5 136 with at least one of the chronic diseases from the list above, were eligible to participate.  
6  
7  
8 137

### 9 10 138 **Patient and public involvement**

11  
12 139 The research question underlying the study was driven by considerations regarding tools to  
13  
14 140 improve patients' empowerment concerning their diets. Patients were not directly involved in  
15  
16  
17 141 the development of the protocol or in recruitment of participants. Dissemination of the research  
18  
19 142 results will be done through the NutriNet-Santé cohort platform, with an abstract in the French  
20  
21 143 language, allowing for all participants to be informed.  
22  
23

### 24 144 25 26 145 **Randomization and blinding**

27  
28 146 Eligible participants were randomly allocated to one of the three arms using a random block  
29  
30 147 method with permuted blocks of size 3, 6, 9 and 12, without stratification. The randomization  
31  
32  
33 148 list was only available to the independent statistician who generated the randomization  
34  
35 149 sequence and the computer programmer who uploaded the list on the secured platform. Given  
36  
37 150 the nature of the intervention, participants could not be blinded of the intervention; however,  
38  
39 151 they were only informed about the main objectives of the experimental online supermarket,  
40  
41  
42 152 aiming to investigate determinants of purchasing behaviour. No information was given on the  
43  
44 153 FoPLs or the explicit purpose of the trial.  
45  
46

### 47 154 48 49 155 **Intervention and procedure**

#### 50 51 156 Experimental arm

52  
53 157 The experimental arm consisted on the Nutri-Score applied on the front of package of all pre-  
54  
55  
56 158 packed foods included in the online supermarket. The Nutri-Score is a summary FoPL  
57  
58 159 characterizing the overall nutritional quality of foods. The label is based on the Food Standards  
59  
60

1  
2  
3 160 Agency Nutrient Profiling System, modified by the High Council of Public Health to better  
4  
5 161 discriminate foods from specific categories (cheese, fats and beverages) consistently with  
6  
7 162 nutritional recommendations (FSAm-NPS).[18] The FSAm-NPS is calculated for 100g (or  
8  
9 163 100mL) of food, and allocates from 0 to 10 points for each nutrient which should be limited  
10  
11 164 (energy (kJ), SFA (g), sugars (g), and sodium (mg)) and from 0 to 5 points to each favourable  
12  
13 165 nutrient which should be encouraged (proteins (g), fibres (g), and the content in fruits,  
14  
15 166 vegetables, legumes and nuts (%)). A discrete score is finally obtained by subtracting the  
16  
17 167 favourable points from the unfavourable points, ranging therefore between -15, for food  
18  
19 168 products with higher nutritional quality, to +40 points for food products with lower nutritional  
20  
21 169 quality. Then, the Nutri-Score is represented by a 5-colour scale with a corresponding letter,  
22  
23 170 from dark green (A) indicating the highest nutritional quality to dark orange (E) for products  
24  
25 171 with the lowest nutritional quality.  
26  
27  
28  
29  
30  
31  
32

### 33 173 Control arms

34  
35 174 Two control arms were also included: (1) the RIs FoPL was affixed on all pre-packed food  
36  
37 175 items, and (2) no front-of-pack nutritional labelling at all. The RIs is a nutrient-specific  
38  
39 176 monochromatic label endorsed by some manufacturers, indicating the kilocalories and the  
40  
41 177 amount of fat, SFA, sugars and sodium in gram per serving, and their contribution in  
42  
43 178 percentages to the guideline-based daily intakes.[29] In the no label arm, no nutrition label was  
44  
45 179 applied on the front of food packages on the experimental online supermarket.  
46  
47  
48  
49  
50

51  
52 181 The experimental online supermarket was composed of three sections. First, the upper section  
53  
54 182 included the logo of the supermarket, a search bar, an access to the shopping cart, and the tabs  
55  
56 183 for the different food categories. Second, a central section displaying advertisements and  
57  
58 184 showing shoppers in a supermarket aisle was included. The rotating banner ad on the left side  
59  
60

1  
2  
3 185 of the central section included one specific ad and four ads on non-dietary information such as  
4  
5 186 information on national campaigns of health promotion. In the two arms with a FoPL, the  
6  
7 187 specific ad drew awareness on the label with additional information on its computation and use.  
8  
9 188 In the no label arm, additional information was provided on the proper conservation of fresh  
10  
11 189 food products. On the central section, the participant could also view the different products  
12  
13 190 depending on the food categories, and access the information (name, brand, price, nutritional  
14  
15 191 information, etc) by clicking on the product. For the two label arms, the nutritional label was  
16  
17 192 affixed on the front of the package and next to the product on a larger scale to improve its  
18  
19 193 readability. Third, the lower section included links to the various food categories, links for  
20  
21 194 information and links towards account information. An example of a food item included in the  
22  
23 195 experimental online supermarket with its three versions depending on the trial arm is shown in  
24  
25 196 Figure 1 and a picture of the experimental online supermarket is presented in Figure S1 [28].  
26  
27  
28  
29  
30  
31  
32

### 33 198 Procedure

34  
35 199 For this specific purpose, an experimental online supermarket was developed, similar to  
36  
37 200 previous trials.[18,28] Eligible participants were invited to simulate a shopping task as if they  
38  
39 201 were in their usual supermarket, but without any payment required and no instruction on the  
40  
41 202 amount, the duration or the number of participants they were asked to shop for. The  
42  
43 203 experimental online supermarket resembled existing grocery shopping websites with a virtual  
44  
45 204 shopping cart, a virtual payment procedure, a search tab and promotional banners. As in real  
46  
47 205 shopping websites, participants could choose products categorized in multiple food groups and  
48  
49 206 subgroups, using a hierarchical structure and names of the categories similar to existing online  
50  
51 207 supermarkets. The food offer was a representative sample of the products commonly sold on  
52  
53 208 French online supermarkets and included 751 foods and beverages (pre-packed products  
54  
55 209 carrying a FoPL on the Nutri-Score and RIs arms, and raw products without any label in the  
56  
57  
58  
59  
60

1  
2  
3 210 three arms according to the European regulation), divided into twenty food categories. For all  
4  
5 211 products, name, brand, price (per unit and per kg or litter), a picture of the product (with or  
6  
7 212 without a FoPL, depending on the arm) and the nutritional composition as well as the list of  
8  
9 213 ingredients were provided. For each food item, at least two different products were proposed,  
10  
11 214 including a national brand and a retailer's brand. The number of brands proposed balanced the  
12  
13 215 nutritional variability observed for a given type of food.  
14  
15

## 16 216 **Outcomes**

17  
18  
19 217 The primary outcome was the overall nutritional quality of the shopping cart, assessed by the  
20  
21 218 mean of the FSAm-NPS score across all the items in the cart, computed for 100g. A lower  
22  
23 219 overall FSAm-NPS score of the shopping cart reflects a higher nutritional quality of the entire  
24  
25 220 selection of products within the cart.  
26  
27

28 221 Secondary outcomes were, by order of importance, the content of the shopping cart in energy,  
29  
30 222 SFA, sugars, sodium, fibres, fruits and vegetables, and proteins, for 100g of the shopping cart.  
31  
32

## 33 223

## 34 224 **Statistical analyses**

35  
36  
37 225 The final sample size was calculated for an effect size of 0.2 (for the main outcome, FSAm-  
38  
39 226 NPS score), a power of 90% and a p-value of 0.02 considering the three-arm design, resulting  
40  
41 227 in 1,956 individuals, i.e. 652 participants per arm. To reach this final sample size while  
42  
43 228 considering non-respondents, 2,431 individuals were initially randomized and the number of  
44  
45 229 individuals validating their shopping cart was monitored.  
46  
47  
48

49 230  
50  
51 231 Per protocol analyses were carried out, given that only one measure was collected for the  
52  
53 232 outcome. All participants meeting the inclusion criteria and who completed the shopping task  
54  
55 233 were included in the analyses. The primary outcome was compared between the three trial arms  
56  
57 234 using one-way ANOVA (p-value $\leq$ 0.05 significant). Pairwise comparisons among FoPLs were  
58  
59  
60

1  
2  
3 235 performed using Tukey tests to consider multiple comparisons ( $p\text{-value} \leq 0.05$  significant).  
4  
5 236 Then, secondary outcome variables were also compared between the three arms using a  
6  
7 237 hierarchical gatekeeping strategy[28] with the following order: 1. Energy, 2. SFA, 3. Sugars, 4.  
8  
9 238 Sodium, 5. Fibres, 6. Fruits and vegetables, 7. Proteins. When the comparison across the three  
10  
11 239 arms for a component was not significant, the comparison of following secondary outcomes  
12  
13 240 was stopped. The gatekeeping strategy order was determined using the relative importance of  
14  
15 241 the various nutrients to health (with the most unfavourable elements first) and the results of  
16  
17 242 previous studies assessing FoPL effects on the nutritional quality of food purchases.[18]  
18  
19 243 Analyses were performed considering the FSAm-NPS score of all products from the  
20  
21 244 experimental supermarket, including also raw items that were not labelled in any trial arm (i.e.  
22  
23 245 fruits, vegetables, meat and poultry). Multiple sensitivity analyses were then performed. First,  
24  
25 246 sensitivity analyses were computed (1) including only labelled food products (i.e. pre-packed  
26  
27 247 foods and beverages), (2) excluding participants whose spending amount was below the 5<sup>th</sup>  
28  
29 248 percentile or over the 95<sup>th</sup> percentile of the distribution of the cost of the shopping carts in the  
30  
31 249 sample, and (3) using multiple imputations on missing outcomes (25 imputed sets) to consider  
32  
33 250 the non-response rate. Missing primary and secondary outcomes of non-respondents were  
34  
35 251 imputed using the individual characteristics of the individuals, including sociodemographic and  
36  
37 252 nutrition-related lifestyle data collected in the inclusion questionnaire. The total quantities of  
38  
39 253 calories, SFA, sugars, sodium, fibres, and proteins in the shopping carts were also calculated  
40  
41 254 and compared across the three arms using ANOVA. The composition of the shopping cart  
42  
43 255 across the different food categories was calculated in percentage of the total number of products  
44  
45 256 in the cart (mean and standard error). The contributions of each food group to the nutrient  
46  
47 257 amounts in the shopping carts were then calculated and expressed a mean percentage and  
48  
49 258 standard error. Finally, the distribution of the products across the different Nutri-Score classes  
50  
51  
52  
53  
54  
55  
56  
57  
58  
59  
60

1  
2  
3 259 was also compared between the three arms, taking into account all food products including raw  
4  
5 260 foods that were non-labelled.  
6

7  
8 261  
9  
10 262 All tests of significance were two-sided, and analyses were carried out with the SAS software  
11  
12 263 (version 9.4; SAS Institute, Inc.).  
13

14 264

15  
16  
17 265

## 18 19 266 **RESULTS**

20  
21 267  
22  
23 268 Among 3,728 individuals with chronic diseases assessed for eligibility, 1,297 did not meet  
24  
25 269 inclusion criteria, resulting in 2,431 participants randomly assigned to one of the three arms  
26  
27 270 (Figure 2). Among them, 1,180 individuals with a nutrition-related chronic disease fully  
28  
29 271 completed the shopping task and were finally included in the analyses. The other subjects who  
30  
31 272 did not complete their shopping cart were excluded from the analyses, as their purchasing  
32  
33 273 behaviour may not be representative of their habits. Overall, participants of the trial included  
34  
35 274 65.5% of women, 27.8% of subjects with primary educational level, and their mean age was  
36  
37 275 65.0±7.1 years (Table 1). Regarding purchasing behaviour, 61.2% declared doing always their  
38  
39 276 grocery shopping and 29.7% reported having purchased foods online at least once. Among  
40  
41 277 them, 16.2% reported purchasing online at least one time per week. 57.2% of the included  
42  
43 278 participants declared having an intermediate self-estimated nutrition knowledge level, and  
44  
45 279 51.4% often reading the nutrition facts. The two main chronic diseases represented in the trial  
46  
47 280 were arterial hypertension (65.7%) and dyslipidaemia (33.9%), then followed by cardiovascular  
48  
49 281 diseases (15.2%), type 2 diabetes (14.7%), and obesity (13.8%). Approximately 30% of  
50  
51 282 participants reported having more than one of the diseases included in the trial. Individual  
52  
53 283 characteristics of participants were globally similar between the three arms. The mean cost of  
54  
55  
56  
57  
58  
59  
60

1  
2  
3 284 the shopping cart was 75.0±51.5 euros overall, 80.0±57.8 euros in the Nutri-Score arm,  
4  
5 285 73.9±48.3 euros in the RIs arm and 71.2±47.3 euros in the no label arm. The mean weight of  
6  
7 286 the shopping carts was 16.6±14.3 kg in the Nutri-Score arm with 22.9±21.9 products on  
8  
9 287 average, 24.2±14.7 kg in the Reference Intakes arm with 33.6±22.0 products on average, and  
10  
11 288 22.7±14.2 kg in the no label arm with 31.1±21.3 products on average  
12  
13  
14  
15 289

16  
17 290 According to the flow diagram, approximately 50% of participants did not complete the virtual  
18  
19 291 shopping task. Individual characteristics between respondents and non-respondents were  
20  
21 292 compared and results are displayed in Table S1. Even if non-respondents had some small  
22  
23 293 disparities on their sociodemographic and lifestyle characteristics compared to respondents, this  
24  
25 294 potential bias was similar in the three arms. Indeed, the interaction term between each individual  
26  
27 295 characteristic and the arm to model the probability of no response was not statistically  
28  
29 296 significant ( $p\text{-value} \geq 0.1$ ).  
30  
31  
32  
33  
34  
35  
36  
37  
38  
39  
40  
41  
42  
43  
44  
45  
46  
47  
48  
49  
50  
51  
52  
53  
54  
55  
56  
57  
58  
59  
60



1  
2  
3 309  
4  
5 310  
6  
7  
8 311  
9  
10 312  
11  
12 313  
13  
14  
15 314  
16

**Table 1** Individual characteristics of included participants, NutriNet-Santé cohort (N=1,180)

|                                                     | Nutri-Score | Reference Intakes | No label   | Total      |
|-----------------------------------------------------|-------------|-------------------|------------|------------|
| <b>Total (n)</b>                                    | 394         | 392               | 394        | 1180       |
| <b>Gender, n(%)</b>                                 |             |                   |            |            |
| Men                                                 | 131 (33.3)  | 124 (31.6)        | 152 (38.6) | 407 (34.5) |
| Women                                               | 263 (66.7)  | 268 (68.4)        | 242 (61.4) | 773 (65.5) |
| <b>Age, years</b>                                   | 64.8 ± 6.9  | 64.8 ± 7.3        | 65.4 ± 7.1 | 65.0 ± 7.1 |
| <b>Educational level, n(%)</b>                      |             |                   |            |            |
| Primary                                             | 122 (31.0)  | 102 (26.0)        | 104 (26.4) | 328 (27.8) |
| Secondary                                           | 53 (13.4)   | 51 (13.0)         | 74 (18.8)  | 178 (15.1) |
| University, undergraduate degree                    | 103 (26.1)  | 122 (31.2)        | 99 (25.1)  | 324 (27.4) |
| University, postgraduate degree                     | 98 (24.9)   | 102 (26.0)        | 103 (26.1) | 303 (25.7) |
| Other                                               | 18 (4.6)    | 15 (3.8)          | 14 (3.6)   | 47 (4.0)   |
| <b>Grocery shopping frequency, n(%)</b>             |             |                   |            |            |
| Always                                              | 231 (58.63) | 252 (64.3)        | 239 (60.6) | 722 (61.2) |
| Often                                               | 122 (30.96) | 107 (27.3)        | 113 (28.7) | 342 (29.0) |
| Sometimes                                           | 41 (10.41)  | 33 (8.4)          | 42 (10.7)  | 116 (9.8)  |
| <b>Online grocery shopping, yes n(%)</b>            | 119 (30.2)  | 129 (32.9)        | 103 (26.1) | 351 (29.7) |
| <b>Online grocery shopping frequency, n(%)</b>      |             |                   |            |            |
| At least one time per week                          | 16 (13.4)   | 20 (15.5)         | 21 (20.4)  | 57 (16.2)  |
| One or two times per month                          | 22 (18.5)   | 26 (20.1)         | 15 (14.5)  | 63 (18.0)  |
| One time every two or three months                  | 29 (24.4)   | 33 (25.6)         | 17 (16.5)  | 79 (22.5)  |
| One or two times per year                           | 23 (19.3)   | 21 (16.3)         | 29 (28.2)  | 73 (20.8)  |
| Less than one time per year                         | 29 (24.4)   | 29 (22.5)         | 21 (20.4)  | 79 (22.5)  |
| <b>Weekly budget for grocery shopping (€), n(%)</b> |             |                   |            |            |
| < 30€                                               | 13 (3.3)    | 17 (4.3)          | 16 (4.1)   | 46 (3.9)   |
| 30 – 50€                                            | 76 (19.3)   | 74 (18.9)         | 63 (16.0)  | 213 (18.0) |
| 50 – 100€                                           | 151 (38.3)  | 168 (42.9)        | 160 (40.6) | 479 (40.6) |
| > 100€                                              | 151 (38.3)  | 130 (33.1)        | 147 (37.3) | 428 (36.3) |
| Missing                                             | 3 (0.8)     | 3 (0.8)           | 8 (2.0)    | 14 (1.2)   |
| <b>Perceived nutritional knowledge, n(%)</b>        |             |                   |            |            |
| High                                                | 38 (9.6)    | 38 (9.7)          | 22 (5.6)   | 98 (8.3)   |
| Intermediate                                        | 222 (56.4)  | 220 (56.1)        | 233 (59.1) | 675 (57.2) |
| Low                                                 | 125 (31.7)  | 125 (31.9)        | 124 (31.5) | 374 (31.7) |
| No                                                  | 9 (2.3)     | 7 (1.8)           | 9 (2.3)    | 25 (2.1)   |
| Missing data                                        | 0           | 2 (0.5)           | 6 (1.5)    | 8 (0.7)    |
| <b>Nutrition facts reading frequency, n(%)</b>      |             |                   |            |            |
| Always                                              | 63 (16.0)   | 55 (14.0)         | 54 (13.7)  | 172 (14.6) |
| Often                                               | 202 (51.3)  | 199 (50.8)        | 206 (52.3) | 607 (51.4) |

1  
2  
3  
4  
5  
6  
7  
8  
9  
10  
11  
12  
13  
14  
15  
16  
17  
18  
19  
20  
21  
22  
23  
24  
25  
26  
27  
28  
29  
30  
31  
32  
33  
34  
35  
36  
37  
38  
39  
40  
41  
42  
43  
44  
45  
46  
47  
48  
49  
50  
51  
52  
53  
54  
55  
56  
57  
58  
59  
60

|                                         |             |             |             |             |
|-----------------------------------------|-------------|-------------|-------------|-------------|
| Sometimes                               | 117 (29.7)  | 122 (31.1)  | 119 (30.2)  | 358 (30.3)  |
| Never                                   | 12 (3.0)    | 14 (3.6)    | 9 (2.3)     | 35 (3.0)    |
| Missing data                            | 0           | 2 (0.5)     | 6 (1.5)     | 8 (0.7)     |
| <b>Chronic disease diagnosed, n(%)</b>  |             |             |             |             |
| Arterial hypertension                   | 265 (67.3)  | 256 (65.3)  | 254 (64.5)  | 775 (65.7)  |
| Diabetes mellitus                       | 51 (12.9)   | 55 (14.0)   | 67 (17.0)   | 173 (14.7)  |
| Cardiovascular disease                  | 65 (16.5)   | 48 (12.2)   | 66 (16.8)   | 179 (15.2)  |
| Dyslipidemia                            | 141 (35.8)  | 127 (32.4)  | 132 (33.5)  | 400 (33.9)  |
| Obesity                                 | 43 (10.9)   | 58 (14.8)   | 62 (15.7)   | 163 (13.8)  |
| Total cost of the shopping cart (€)     | 80.0 ± 57.8 | 73.9 ± 48.3 | 71.2 ± 47.3 | 75.0 ± 51.5 |
| Number of products in the shopping cart | 22.9 ± 21.9 | 33.6 ± 22.0 | 31.1 ± 21.3 | 29.2 ± 22.2 |
| Weight of the shopping cart (kg)        | 16.6 ± 14.3 | 24.2 ± 14.7 | 22.7 ± 14.2 | 21.2 ± 14.8 |

Values are mean ± standard deviation or n (%) as appropriate.

1  
2  
3 315 **Outcomes**  
4

5 316 The FSAm-NPS score was lower in the Nutri-Score arm ( $1.29 \pm 3.61$  points), reflecting a higher  
6  
7 overall nutritional quality of the shopping carts, followed by the RIs arm ( $1.86 \pm 3.23$  points)  
8 317  
9 and no label ( $1.92 \pm 2.9$  points) (Table 2). The difference of FSAm-NPS scores were statistically  
10 318  
11 significant between the Nutri-Score and the RIs groups (mean difference= $-0.57[-1.11;-0.02]$ ;  
12 319  
13 p-value= $0.04$ ), and between the Nutri-Score and no label ( $-0.63[-1.17;-0.08]$ ; p-value= $0.02$ ).  
14 320  
15 No significant difference was observed between the RIs and no label ( $-0.06[-0.61;0.48]$ ; p-  
16 321  
17 value= $1.0$ ). Furthermore, the Nutri-Score label led to a significantly lower content of the  
18 322  
19 shopping carts in calories and SFA, compared to the RIs and no label (p-values $\leq 0.0001$  for  
20 323  
21 comparisons of calories between the Nutri-Score and both RIs and no label; p-values= $0.01$  for  
22 324  
23 comparisons of SFA between the Nutri-Score and both RIs and no label). The differences  
24 325  
25 between the RIs and no label arms were not significant. The differences of sugars content  
26 326  
27 between the three arms were not significant; then comparisons of subsequent secondary  
28 327  
29 outcomes were stopped.  
30 328  
31  
32  
33  
34  
35  
36  
37  
38  
39  
40  
41  
42  
43  
44  
45  
46  
47  
48  
49  
50  
51  
52  
53  
54  
55  
56  
57  
58  
59  
60

**Table 2** Overall nutritional quality, energy and nutrient content for 100g of the shopping cart

|                                                   | Nutri-Score     | Reference Intakes | No label        | P-value           | Nutri-Score vs no label |                   | Nutri-Score vs Reference Intakes |                   | Reference Intakes vs no label |                |
|---------------------------------------------------|-----------------|-------------------|-----------------|-------------------|-------------------------|-------------------|----------------------------------|-------------------|-------------------------------|----------------|
|                                                   | N=394           | N=392             | N=394           |                   | Difference <sup>a</sup> | P <sup>b</sup>    | Difference <sup>a</sup>          | P <sup>b</sup>    | Difference <sup>a</sup>       | P <sup>b</sup> |
| Overall nutritional quality (FSAm-NPS score/100g) | 1.29 (3.61)     | 1.86 (3.23)       | 1.92 (2.9)      | <b>0.01</b>       | -0.63 (-1.17;-0.08)     | <b>0.02</b>       | -0.57 (-1.11;-0.02)              | <b>0.04</b>       | -0.06 (-0.61;0.48)            | 1.0            |
| Calories (kcal/100g)                              | 153.53 (76.96)  | 184.06 (64.38)    | 175.38 (64.22)  | <b>&lt;0.0001</b> | -21.85 (-33.35;-10.35)  | <b>&lt;0.0001</b> | -30.53 (-42.05;-19.02)           | <b>&lt;0.0001</b> | 8.68 (-2.83;20.20)            | 0.2            |
| Saturated fatty acids (g/100g)                    | 3.24 (3.13)     | 3.78 (2.13)       | 3.77 (2.36)     | <b>0.004</b>      | -0.53 (-0.96;-0.10)     | <b>0.01</b>       | -0.53 (-0.96;-0.10)              | <b>0.01</b>       | 0.01 (-0.42;0.44)             | 1.0            |
| Sugars (g/100g)                                   | 5.92 (3.58)     | 5.89 (3.25)       | 5.65 (3.81)     | 0.5               | 0.27 (-0.32;0.87)       | 0.5               | 0.03 (-0.56;0.63)                | 1.0               | 0.24 (-0.35;0.84)             | 0.6            |
| Sodium (mg/100g)                                  | 189.83 (200.21) | 195.51 (104.13)   | 212.73 (158.16) |                   |                         |                   |                                  |                   |                               |                |
| Fibers (g/100g)                                   | 1.37 (0.99)     | 1.89 (1.17)       | 1.65 (0.97)     |                   |                         |                   |                                  |                   |                               |                |
| Fruits and vegetables (%)                         | 34.12 (22.87)   | 29.51 (16.03)     | 28.90 (14.81)   |                   |                         |                   |                                  |                   |                               |                |
| Proteins (g/100g)                                 | 7.36 (3.43)     | 7.29 (2.20)       | 7.58 (3.33)     |                   |                         |                   |                                  |                   |                               |                |

<sup>a</sup> Mean difference (95% Confidence Interval)<sup>b</sup> P-value using Tukey's multiple comparisons tests. Boldface indicates statistical significance (p-value≤0.05). FSAm-NPS: modified Food Standards Agency Nutrient Profiling System.

1  
2  
3 330 When analyses considered pre-packed products only, the overall difference of shopping carts'  
4  
5 331 FSAm-NPS score between the three arms was no longer significant suggesting inter-food group  
6  
7 332 substitutions (Table S2). However, results for the secondary outcomes remained consistent with  
8  
9 333 the main analyses. In sensitivity analyses excluding outliers on the spending amount, similar  
10  
11 334 results were observed for primary and secondary outcomes (Table S3). Results of the sensitivity  
12  
13 335 analyses using multiple imputations are presented in Table S4 for analyses considering all food  
14  
15 336 products and Table S5 for analyses considering only labelled food items. Results using multiple  
16  
17 337 imputations were consistent with the main analyses; however, the amplitude of differences  
18  
19 338 between arms was lower and comparisons were no longer significant, except for calories for  
20  
21 339 which the Nutri-Score also led to lower contents compared to the two other arms (Tables S4  
22  
23 340 and S5). The participants in the Nutri-Score arm purchased less calories, SFA, sugars, sodium,  
24  
25 341 fibres, and proteins compared to the two other arms (Table S6).

26  
27 342  
28  
29 343 Table S7 describes the shopping carts composition in terms of the mean number of products  
30  
31 344 per food category in each of the three arms. In the Nutri-Score arm, participants tended to  
32  
33 345 purchase more products from the fruits (especially fresh fruit), meat and water categories  
34  
35 346 (compared to the RIs), and fewer products from vegetables, dairy products, cheeses, sweets and  
36  
37 347 starchy foods such as pasta, rice, rush potatoes and semolina. The average percentages of raw  
38  
39 348 products (i.e. not labelled in the label arms) purchased by participants were 32.9%±18.4% in  
40  
41 349 the no label arm, 33.2%±18.2% in the RIs arm, and 42.0%±28.1% in the Nutri-Score arm. The  
42  
43 350 percentage contributions of food groups to nutrient intakes in the overall shopping carts are  
44  
45 351 presented in Table S8 (only for nutrients where a difference between arms was observed in the  
46  
47 352 main analyses). Thus, the lower calorie and SFA contents of the shopping carts in the Nutri-  
48  
49 353 Score arm compared to the RIs arms could be explained by fewer products purchased in the  
50  
51 354 dairy products, cheese, but also sweets and starchy foods. Finally, the proportion of healthier  
52  
53  
54  
55  
56  
57  
58  
59  
60

1  
2  
3 355 food products in the shopping carts classified as A was significantly higher in the Nutri-Score  
4  
5 356 arm compared to the two other arms (difference = 5.63 [2.02;9.24], p-value=0.0008 compared  
6  
7 357 to no label; difference = 4.85 [1.24;8.47], p-value=0.005 compared to the RIs), which can be  
8  
9 358 partly explained by the higher proportion of raw fruits and meats in the shopping carts of  
10  
11 359 participants from the Nutri-Score group – corresponding to products with higher nutritional  
12  
13 360 quality (Table S9). On the contrary, the proportion of unhealthier products classified as D or E  
14  
15 361 was significantly lower in the Nutri-Score arm compared to the two other arms or the RIs only.  
16  
17 362 No significant difference was observed between the RIs and no label.  
18  
19  
20  
21  
22 363  
23  
24 364

## 26 365 **DISCUSSION**

27  
28 366  
29  
30 367 Results of the present study showed that the Nutri-Score label significantly led to an  
31  
32 368 improvement of the overall nutritional quality of food purchases in individuals with  
33  
34 369 cardiometabolic chronic disease. Moreover, the Nutri-Score led to lower contents of the  
35  
36 370 shopping carts in energy and SFA compared to the two other arms. Similar trends were observed  
37  
38 371 with multiple imputations; nevertheless, differences were no longer statistically significant. No  
39  
40 372 significant difference was observed between the RIs and no label. Moreover, in both FoPLs  
41  
42 373 arms, and particularly in the Nutri-Score arm, substitutions between food groups were observed,  
43  
44 374 with more raw products purchased – corresponding mainly to fruits and butcher's meats from  
45  
46 375 higher nutritional quality. It appeared that the participants exposed to the Nutri-Score purchased  
47  
48 376 less products and from higher overall nutritional quality (i.e. lower FSAm-NPS score).  
49  
50  
51  
52  
53  
54 377

55  
56 378 The present findings are consistent with studies which observed a positive effect of interpretive  
57  
58 379 FoPLs and especially the Nutri-Score on the nutritional quality of intentional or real food  
59  
60

1  
2  
3 380 purchases, while the RIs demonstrated a limited or non-significant effect in the general  
4  
5 381 population[14,18] or students.[28] This could be partly explained by the features of the  
6  
7 382 schemes. Indeed, the summary indicator of the Nutri-Score, combining colours and text, would  
8  
9  
10 383 be easier to read and understand.[16,18,19,31–37] On the contrary, the RIs with its nutrient-  
11  
12 384 specific and monochromatic format, has been shown to be more complicated to identify and  
13  
14 385 understand in the general population,[18,36,37] creating notably potential decisional conflicts  
15  
16  
17 386 and prioritization of nutrients.[38] Nevertheless, to our knowledge, this is the first study to  
18  
19 387 assess the effect of FoPLs on purchasing intentions among individuals suffering from nutrition-  
20  
21 388 related NCDs. Only one study investigated the effect of the Traffic Lights nutrient-specific label  
22  
23  
24 389 and the three-stars summary label on food purchases in vending machine among patients in an  
25  
26 390 Australian hospital and observed a positive effect of the labels to identify healthier products.  
27  
28 391 However, the experiment was performed in a specific context and no focus was made on  
29  
30 392 patients suffering specifically from nutrition-related NCDs.[12]

31  
32  
33 393  
34  
35 394 Interestingly, while previous studies among patients with hypertension, hypercholesterolemia,  
36  
37 395 type 2 diabetes or hyperlipidaemia found that they were more likely to read information on salt  
38  
39  
40 396 and SFA respectively,[39] and have lower intakes in energy and SFA,[9] in the present study,  
41  
42 397 the RIs did not help consumers to select products with significantly less SFA compared to no  
43  
44 398 label. On the contrary, the Nutri-Score which does not provide numerical data but rather  
45  
46  
47 399 summarized information, led to significantly lower contents of the shopping carts in SFA  
48  
49 400 compared to no label and the RIs. These results on the Nutri-Score effect are particularly  
50  
51 401 important, given that a decrease of the intakes in energy, SFA and salt with an increase of fruits  
52  
53 402 and vegetables consumption are recommended among patients suffering from nutrition-related  
54  
55  
56 403 NCDs.[1] Moreover, despite these recommendations, it has been observed in a study within the  
57  
58 404 NutriNet-Santé cohort that adults with a cardiometabolic disease tended to have unhealthier  
59  
60

1  
2  
3 405 dietary habits overall (e.g. lower intakes of fruits, higher intakes of meat, processed meat and  
4  
5 406 added fats) compared to healthy controls,[40] which supports the interest of public health  
6  
7 407 measures encouraging healthier food choices among these individuals.  
8  
9

10 408  
11  
12 409 When analyses were restricted to labelled items only, no significant difference of the overall  
13  
14 410 nutritional quality between the Nutri-Score and the other arms was found. These results reflect  
15  
16 411 that the use of the Nutri-Score may encourage also substitutions between food categories.  
17  
18 412 Indeed, participants who were exposed to the Nutri-Score tended to purchase more non-labelled  
19  
20 413 raw products, in particular fruits, meat and poultry, characterized by healthier nutritional  
21  
22 414 quality.  
23  
24  
25

26 415  
27  
28 416 The present study provides insights regarding the effect of the Nutri-Score on purchasing  
29  
30 417 intentions of individuals with nutrition-related NCDs compared to the current labelling situation  
31  
32 418 in France and other European countries. First, strength of the study pertained in the inclusion  
33  
34 419 of a specific population rarely explored in the nutritional labelling field, and its randomized  
35  
36 420 controlled design, which resulted in comparable groups allowing accurate estimations of the  
37  
38 421 labels' effect. Furthermore, the experiment was conducted on an experimental online  
39  
40 422 supermarket, closed to real online grocery shopping conditions, with a range of different  
41  
42 423 products with distinct nutritional profiles, brands and the use of real packaging. This controlled  
43  
44 424 experimental environment allowed assessing the effect of the Nutri-Score in standardized  
45  
46 425 conditions and optimizing internal validity of the study. Nevertheless, some limitations should  
47  
48 426 be acknowledged. First, a high rate of participants did not complete the shopping task. Hence,  
49  
50 427 respondents may have different individual characteristics, leading however to a potential non-  
51  
52 428 differential bias which could limit the generalizability of the results. In addition, the reduced  
53  
54 429 sample size could have led to a decreased statistical power preventing us from detecting some  
55  
56  
57  
58  
59  
60



1  
2  
3 430 potential small differences. Moreover, it is important to notice that analyses with multiple  
4  
5 431 imputations led to similar trends but with non-significant differences given the increase of  
6  
7 432 variance in the sample. Second, the trial involved voluntary participants, who may have greater  
8  
9 433 interest and knowledge in nutrition than the French population of patients. Thus, participants in  
10  
11 434 the no label arm might have made healthier food choices than the general population and the  
12  
13 435 effects of FoPLs in comparison could have been underestimated. Third, despite the diversity of  
14  
15 436 the food offer proposed, the number of products was somewhat limited, and some participants  
16  
17 437 may not have found their usual product and chose foods they would not buy in real shopping  
18  
19 438 situation. In addition, the representativity of the experimental food offer was not carefully  
20  
21 439 assessed. These elements would limit the external validity of the study and the generalisability of  
22  
23 440 the results to a real online supermarket. Moreover, compared to the French average, the higher  
24  
25 441 proportion of subjects who declared doing often their grocery shopping online, may have led to  
26  
27 442 a sample with sociodemographic differences compared to the French population of patients.  
28  
29 443 Fourth, the trial investigated purchasing intentions rather than actual food purchases that may  
30  
31 444 have led the participants to take the experiment less seriously or to spend more money than they  
32  
33 445 would actually do. Complementary studies should be conducted in real-life settings to provide  
34  
35 446 additional elements on the Nutri-Score effectiveness. Nevertheless, virtual purchasing  
36  
37 447 behaviours of individuals have been suggested to be good predictors of real behaviours.[41]  
38  
39 448 Finally, the study included cases of self-reported cardiometabolic chronic conditions with no  
40  
41 449 validation required. Therefore, we were not able to ascertain whether the participants were  
42  
43 450 following specific diets or nutritional recommendations during the period of the trial, which  
44  
45 451 could have modified their purchasing behaviours. The present study focused on the Nutri-Score  
46  
47 452 effect as a secondary or tertiary prevention tool of NCDs, and complement previous studies  
48  
49 453 which have been conducted on the general population including individual without any chronic  
50  
51 454 conditions, or on specific subgroups such as students. Furthermore, it could have been  
52  
53  
54  
55  
56  
57  
58  
59  
60

1  
2  
3 455 interesting to also include individuals having someone in the household with a chronic  
4  
5 456 condition.  
6  
7

8 457  
9  
10 458 These results support that the Nutri-Score may improve the nutritional quality of food choices  
11  
12 459 of consumers suffering from nutrition-related chronic diseases. This is particularly important  
13  
14 460 given that an improvement of the dietary habits and the nutritional status of these individuals is  
15  
16 461 a major element in the secondary prevention and the management of these non-communicable  
17  
18 462 diseases. These findings are complementary to studies having observed a favourable effect of  
19  
20 463 the Nutri-Score or its underlying nutrient profiling system on chronic diseases risk, in a context  
21  
22 464 of primary prevention, through an improvement of food purchases and nutrient intakes.[18,42]  
23  
24  
25  
26  
27  
28  
29  
30  
31  
32  
33  
34  
35  
36  
37  
38  
39  
40  
41  
42  
43  
44  
45  
46  
47  
48  
49  
50  
51  
52  
53  
54  
55  
56  
57  
58  
59  
60

## 465 **Acknowledgments**

466 The authors would like to thank especially Younes Essedik (IT manager), Nathalie Pecollo  
467 (operational coordinator) for the design of the experimental supermarket, Paul Flanzky  
468 (computer technician) for computer management, Julien Allègre (data manager) for data  
469 extraction and datamanagement, Flora Demory, Apolline Caroux, Wassila Ait Haddad, Amaia  
470 Cherbero, Aurélie Gayon for their contribution in the implementation of the experimental  
471 supermarket, and University deans for their contribution and involvement in the recruitment of  
472 participants.

## 474 **Competing interests**

475 All authors declare no competing interests.

## 477 **Author contributorship**

478 ME, CJ and IB wrote the statistical analysis plan, analysed the data, and drafted and revised the  
479 paper. SP, PD, MT, PG, LF, RP, PR, SH and EKG analysed the data and critically revised the  
480 paper for important intellectual content. SH and CJ designed data collection tools, implemented  
481 the study, monitored data collection for the whole study, and critically revised the draft paper  
482 for important intellectual content. All authors, external and internal, had full access to all of the  
483 data (including statistical reports and tables) in the study and can take responsibility for the  
484 integrity of the data and the accuracy of the data analysis. All authors have read and approved  
485 the final manuscript.

## 487 **Competing interests and funding**

488 This project was funded by the French National Cancer Institute (INCA DA 2015-106). The  
489 NutriNet-Santé study was supported by the following public institutions: French Ministry of  
490 Health and Social Affairs, Santé Publique France, Institut National de la Santé et de la

1  
2  
3 491 Recherche Médicale (INSERM), Institut National de la Recherche Agronomique (INRA),  
4  
5 492 Conservatoire National des Arts et Métiers (CNAM) and Université Paris 13. The funders had  
6  
7 493 no role in the design, implementation, analysis, or interpretation of the data.  
8  
9

10 494

11  
12 495 **Ethics approval and consent to participate**

13  
14 496 The study was approved by the Institutional Review Board of INSERM (IRB Inserm  
15  
16 497 n°IRB0000388 FWA00005831) and the National Commission for Data Protection and  
17  
18 498 Liberties (CNIL n° 909216), and registered at:  
19  
20 499 <https://clinicaltrials.gov/ct2/show/NCT02769455>. Electronic consent was obtained from each  
21  
22 500 participant of the trial.  
23  
24

25  
26 501

27  
28 502 **Data sharing**

29  
30 503 All data supporting the findings of this study are included in the present article or the  
31  
32 504 supplemental material. No additional data available.  
33  
34  
35  
36  
37  
38  
39  
40  
41  
42  
43  
44  
45  
46  
47  
48  
49  
50  
51  
52  
53  
54  
55  
56  
57  
58  
59  
60

## REFERENCES

- 1  
2  
3  
4  
5  
6  
7  
8 505 1 World Health Organization. Diet, Nutrition and the Prevention of Chronic Diseases. In WHO Technical  
9 506 Report Series; 916; WHO: Geneva, Switzerland. 2003.
- 10 507 2 Afshin A, Sur PJ, Fay KA, *et al*. Health effects of dietary risks in 195 countries, 1990–2017: a systematic  
11 508 analysis for the Global Burden of Disease Study 2017. *The Lancet* 2019;**393**:1958–72. doi:10.1016/S0140-  
12 509 6736(19)30041-8
- 13  
14 510 3 L'état de santé de la population en France - RAPPORT 2017 - Ministère des Solidarités et de la Santé.  
15 511 [https://drees.solidarites-sante.gouv.fr/etudes-et-statistiques/publications/recueils-ouvrages-et-](https://drees.solidarites-sante.gouv.fr/etudes-et-statistiques/publications/recueils-ouvrages-et-rapports/recueils-annuels/l-etat-de-sante-de-la-population/article/l-etat-de-sante-de-la-population-en-france-rapport-2017)  
16 512 [rapports/recueils-annuels/l-etat-de-sante-de-la-population/article/l-etat-de-sante-de-la-population-en-france-](https://drees.solidarites-sante.gouv.fr/etudes-et-statistiques/publications/recueils-ouvrages-et-rapports/recueils-annuels/l-etat-de-sante-de-la-population/article/l-etat-de-sante-de-la-population-en-france-rapport-2017)  
17 513 [rapport-2017](https://drees.solidarites-sante.gouv.fr/etudes-et-statistiques/publications/recueils-ouvrages-et-rapports/recueils-annuels/l-etat-de-sante-de-la-population/article/l-etat-de-sante-de-la-population-en-france-rapport-2017) (accessed 5 Feb 2019).
- 18  
19 514 4 Santé Publique France. Etude ESTEBAN 2014-2016 – Chapitre corpulence : stabilisation du surpoids et de  
20 515 l'obésité chez l'enfant et l'adulte. 2017. [https://www.santepubliquefrance.fr/les-actualites/2017/etude-](https://www.santepubliquefrance.fr/les-actualites/2017/etude-esteban-2014-2016-chapitre-corpulence-stabilisation-du-surpoids-et-de-l-obesite-chez-l-enfant-et-l-adulte)  
21 516 [esteban-2014-2016-chapitre-corpulence-stabilisation-du-surpoids-et-de-l-obesite-chez-l-enfant-et-l-adulte](https://www.santepubliquefrance.fr/les-actualites/2017/etude-esteban-2014-2016-chapitre-corpulence-stabilisation-du-surpoids-et-de-l-obesite-chez-l-enfant-et-l-adulte)  
22 517 (accessed 22 Oct 2019).
- 23  
24 518 5 Santé Publique France. Prévalence et incidence du diabète.  
25 519 2019.[https://www.santepubliquefrance.fr/maladies-et-traumatismes/diabete/articles/prevalence-et-](https://www.santepubliquefrance.fr/maladies-et-traumatismes/diabete/articles/prevalence-et-incidence-du-diabete)  
26 520 [incidence-du-diabete](https://www.santepubliquefrance.fr/maladies-et-traumatismes/diabete/articles/prevalence-et-incidence-du-diabete) (accessed 13 Jan 2020).
- 27  
28 521 6 Hong SW, Oh SW, Lee C, *et al*. Association between nutrition label use and chronic disease in Korean  
29 522 adults: the Fourth Korea National Health and Nutrition Examination Survey 2008-2009. *JKorean MedSci*  
30 523 2014;**29**:1457–63.
- 31  
32 524 7 Cannoosamy K, Jeewon R. *A critical assessment of nutrition labelling and determinants of its use and*  
33 525 *understanding*. Progress in Nutrition 2016.
- 34  
35 526 8 Lewis JE, Arheart KL, LeBlanc WG, *et al*. Food label use and awareness of nutritional information and  
36 527 recommendations among persons with chronic disease. *AmJClinNutr* 2009;**90**:1351–7.
- 37  
38 528 9 Post RE, Mainous AG, Diaz VA, *et al*. Use of the nutrition facts label in chronic disease management:  
39 529 results from the National Health and Nutrition Examination Survey. *JAmDiet Assoc* 2010;**110**:628–32.
- 40  
41 530 10 Acton RB, Jones AC, Kirkpatrick SI, *et al*. Taxes and front-of-package labels improve the healthiness of  
42 531 beverage and snack purchases: a randomized experimental marketplace. *Int J Behav Nutr Phys Act* 2019;**16**.  
43 532 doi:10.1186/s12966-019-0799-0
- 44  
45 533 11 Ares G, Varela F, Machin L, *et al*. Comparative performance of three interpretative front-of-pack nutrition  
46 534 labelling schemes: Insights for policy making. *Food Qual Prefer* 2018;**68**:215–25.  
47 535 doi:10.1016/j.foodqual.2018.03.007
- 48  
49 536 12 Carrad AM, Louie JC-Y, Milosavljevic M, *et al*. Consumer support for healthy food and drink vending  
50 537 machines in public places. *Aust N Z J Public Health* 2015;**39**:355–7. doi:10.1111/1753-6405.12386
- 51  
52 538 13 Finkelstein EA, Li W, Melo G, *et al*. Identifying the effect of shelf nutrition labels on consumer purchases:  
53 539 results of a natural experiment and consumer survey. *Am J Clin Nutr* 2018;**107**:647–51.  
54 540 doi:10.1093/ajcn/nqy014
- 55  
56 541 14 Ministère des Solidarités et de la Santé. Evaluation ex ante de systèmes d'étiquetage nutritionnel graphique  
57 542 simplifié - Rapport final du Comité scientifique. 2017. [https://solidarites-](https://solidarites-sante.gouv.fr/IMG/pdf/rapport_comite_scientifique_etiquetage_nutritionnel_150317.pdf)  
58 543 [sante.gouv.fr/IMG/pdf/rapport\\_comite\\_scientifique\\_etiquetage\\_nutritionnel\\_150317.pdf](https://solidarites-sante.gouv.fr/IMG/pdf/rapport_comite_scientifique_etiquetage_nutritionnel_150317.pdf) (accessed 26 Jul  
59 544 2019).

- 1  
2  
3 545 15 Mora-García CA, Tobar LF, Young JC. The Effect of Randomly Providing Nutri-Score Information on  
4 546 Actual Purchases in Colombia. *Nutrients* 2019;**11**. doi:10.3390/nu11030491
- 5  
6 547 16 Ruffieux B, Muller L. Etude sur l'influence de divers systèmes d'étiquetage nutritionnel sur la composition  
7 548 du panier d'achat alimentaire. 2011.
- 8  
9 549 17 Thorndike AN, Riis J, Sonnenberg LM, *et al*. Traffic-light labels and choice architecture: promoting healthy  
10 550 food choices. *Am J Prev Med* 2014;**46**:143–9. doi:10.1016/j.amepre.2013.10.002
- 11  
12 551 18 Julia C, Hercberg S. Development of a new front-of-pack nutrition label in France: the five-colour Nutri-  
13 552 Score. *Public Health Panor* 2017;**3**:537–820.
- 14  
15 553 19 Storcksdieck Genannt Bonsmann S, Marandola G, Ciriolo E, *et al*. Front-of-pack nutrition labelling  
16 554 schemes: a comprehensive review. Luxembourg: : Publications Office of the European Union 2020.  
17 555 [https://ec.europa.eu/jrc/en/publication/eur-scientific-and-technical-research-reports/front-pack-nutrition-](https://ec.europa.eu/jrc/en/publication/eur-scientific-and-technical-research-reports/front-pack-nutrition-labelling-schemes-comprehensive-review)  
18 556 [labelling-schemes-comprehensive-review](https://ec.europa.eu/jrc/en/publication/eur-scientific-and-technical-research-reports/front-pack-nutrition-labelling-schemes-comprehensive-review) (accessed 26 Aug 2020).
- 19  
20 557 20 Young L, Swinburn B. Impact of the Pick the Tick food information programme on the salt content of food  
21 558 in New Zealand. *Health Promot* 2002;**17**:13–9.
- 22  
23 559 21 Vyth EL, Steenhuis IH, Roodenburg AJ, *et al*. Front-of-pack nutrition label stimulates healthier product  
24 560 development: a quantitative analysis. *IntJBehavNutrPhysAct* 2010;**7**:65.
- 25  
26 561 22 Communiqué de presse. Marisol Touraine se félicite des résultats des études sur l'impact d'un logo  
27 562 nutritionnel : leur intérêt et l'efficacité du logo Nutri-score sont démontrés. Paris, Ministère des Affaires  
28 563 sociales et de la Santé. 2017.
- 29  
30 564 23 Anses, INRA, Oqali. Déploiement du Nutri-Score: analyse à partir des données transmises à l'Oqali. Paris:  
31 565 2019.
- 32  
33 566 24 CREDOC. Les enquêtes complémentaires. Etude Quantitative. Paris, Ministère des Affaires sociales et de la  
34 567 Santé. 2017. [http://social-sante.gouv.fr/IMG/pdf/rapport-credoc-fev\\_2017](http://social-sante.gouv.fr/IMG/pdf/rapport-credoc-fev_2017).
- 35  
36 568 25 Julia C, Blanchet O, Mejean C, *et al*. Impact of the front-of-pack 5-colour nutrition label (5-CNL) on the  
37 569 nutritional quality of purchases: an experimental study. *IntJBehavNutrPhysAct* 2016;**13**:101-.
- 38  
39 570 26 Ducrot P, Julia C, Mejean C, *et al*. Impact of Different Front-of-Pack Nutrition Labels on Consumer  
40 571 Purchasing Intentions: A Randomized Controlled Trial. *AmJPrevMed* 2016;**50**:627–36.
- 41  
42 572 27 Crosetto P, Lacroix A, Muller L, *et al*. Nutritional and economic impact of five alternative front-of-pack  
43 573 nutritional labels: experimental evidence. *Eur Rev Agric Econ* Published Online First: 21 August 2019.  
44 574 doi:10.1093/erae/jbz037
- 45  
46 575 28 Egnell M, Boutron I, Péneau S, *et al*. Front-of-Pack Labeling and the Nutritional Quality of Students' Food  
47 576 Purchases: A 3-Arm Randomized Controlled Trial. *Am J Public Health* 2019;**109**:1122–9.  
48 577 doi:10.2105/AJPH.2019.305115
- 49  
50 578 29 Food and Drink Federation. Reference Intakes (previously Guideline Daily Amounts). Food Label. Tool  
51 579 Help Improve Food Lit. Consum. 2017.<http://www.foodlabel.org.uk/label/reference-intakes.aspx> (accessed  
52 580 5 Feb 2017).
- 53  
54 581 30 Hercberg S, Castetbon K, Czernichow S, *et al*. The Nutrinet-Sante Study: a web-based prospective study on  
55 582 the relationship between nutrition and health and determinants of dietary patterns and nutritional status.  
56 583 *BMCPublic Health* 2010;**10**:242-.
- 57  
58 584 31 Feunekes GI, Gortemaker IA, Willems AA, *et al*. Front-of-pack nutrition labelling: testing effectiveness of  
59 585 different nutrition labelling formats front-of-pack in four European countries. *Appetite* 2008;**50**:57–70.
- 60  
61 586 32 Hersey JC, Wohlgenant KC, Arsenault JE, *et al*. Effects of front-of-package and shelf nutrition labeling  
62 587 systems on consumers. *NutrRev* 2013;**71**:1–14.

- 1  
2  
3 588 33 Aschemann-Witzel J, Grunert KG, van Trijp HC, *et al.* Effects of nutrition label format and product  
4 589 assortment on the healthfulness of food choice. *Appetite* 2013;**71**:63–74.  
5  
6 590 34 Malam S, Clegg S, Kirwan S, *et al.* Comprehension and Use of UK Nutrition Signpost Labelling Schemes.  
7 591 University of Surrey : Guildford, UK: 2009.  
8  
9 592 35 Mejean C, Macouillard P, Peneau S, *et al.* Consumer acceptability and understanding of front-of-pack  
10 593 nutrition labels. *JHumNutrDiet* 2013;**26**:494–503.  
11  
12 594 36 Egnell M, Ducrot P, Touvier M, *et al.* Objective understanding of Nutri-Score Front-Of-Package nutrition  
13 595 label according to individual characteristics of subjects: Comparisons with other format labels. *PloS One*  
14 596 2018;**13**:e0202095. doi:10.1371/journal.pone.0202095  
15  
16 597 37 Egnell M, Talati Z, Hercberg S, *et al.* Objective Understanding of Front-of-Package Nutrition Labels: An  
17 598 International Comparative Experimental Study across 12 Countries. *Nutrients* 2018;**10**.  
18 599 doi:10.3390/nu10101542  
19  
20 600 38 Helfer P, Shultz TR. The effects of nutrition labeling on consumer food choice: a psychological experiment  
21 601 and computational model. *AnnNYAcadSci* 2014;**1331**:174–85.  
22  
23 602 39 Kreuter MW, Brennan LK, Scharff DP, *et al.* Do nutrition label readers eat healthier diets? Behavioral  
24 603 correlates of adults' use of food labels. *Am J Prev Med* 1997;**13**:277–83.  
25  
26 604 40 Adriouch S, Lelong H, Kesse-Guyot E, *et al.* Compliance with Nutritional and Lifestyle Recommendations  
27 605 in 13,000 Patients with a Cardiometabolic Disease from the Nutrinet-Santé Study. *Nutrients* 2017;**9**.  
28 606 doi:10.3390/nu9060546  
29  
30 607 41 Sharpe KM, Staelin R, Huber J. Using extremeness aversion to fight obesity: Policy implications of contact  
31 608 dependent demand. *J Consum Res* 2008.  
32  
33 609 42 Egnell M, Crosetto P, d'Almeida T, *et al.* Modelling the impact of different front-of-package nutrition  
34 610 labels on mortality from non-communicable chronic disease. *Int J Behav Nutr Phys Act* 2019;**16**:56.  
35 611 doi:10.1186/s12966-019-0817-2  
36  
37  
38  
39  
40  
41  
42  
43  
44  
45  
46  
47  
48  
49  
50  
51  
52  
53  
54  
55  
56  
57  
58  
59  
60

1  
2  
3 **Figure 1** An example of a food product in the Nutri-Score (1), Reference Intakes (2), and no  
4 label (3) arms  
5  
6  
7  
8  
9

10 **Figure 2** Flow diagram of the randomized controlled trial  
11  
12

13 \* Subjects who validated their online shopping cart and did not encounter technical issues  
14  
15  
16  
17  
18  
19  
20  
21  
22  
23  
24  
25  
26  
27  
28  
29  
30  
31  
32  
33  
34  
35  
36  
37  
38  
39  
40  
41  
42  
43  
44  
45  
46  
47  
48  
49  
50  
51  
52  
53  
54  
55  
56  
57  
58  
59  
60

For peer review only



1  
2  
3  
4  
5  
6  
7  
8  
9  
10  
11  
12  
13  
14  
15  
16  
17  
18  
19  
20  
21  
22  
23  
24  
25  
26  
27  
28  
29  
30  
31  
32  
33  
34  
35  
36  
37  
38  
39  
40  
41  
42  
43  
44  
45  
46  
47  
48  
49  
50  
51  
52  
53  
54  
55  
56  
57  
58  
59  
60

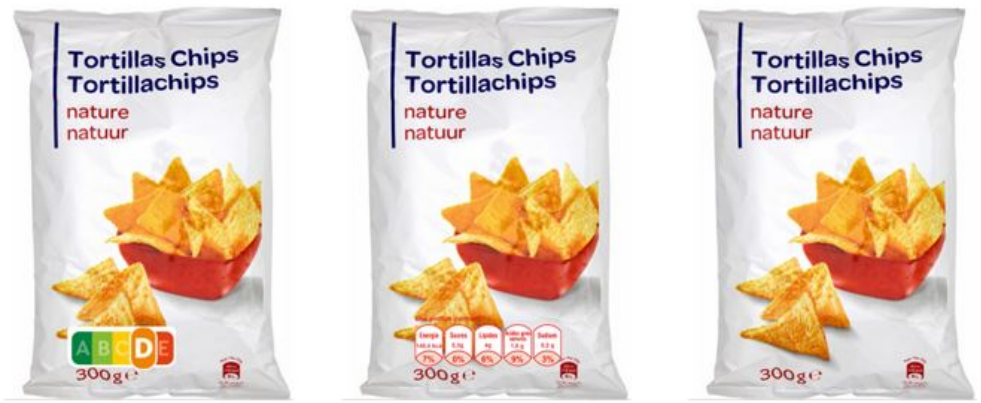

(1)

(2)

(3)

56x28mm (300 x 300 DPI)

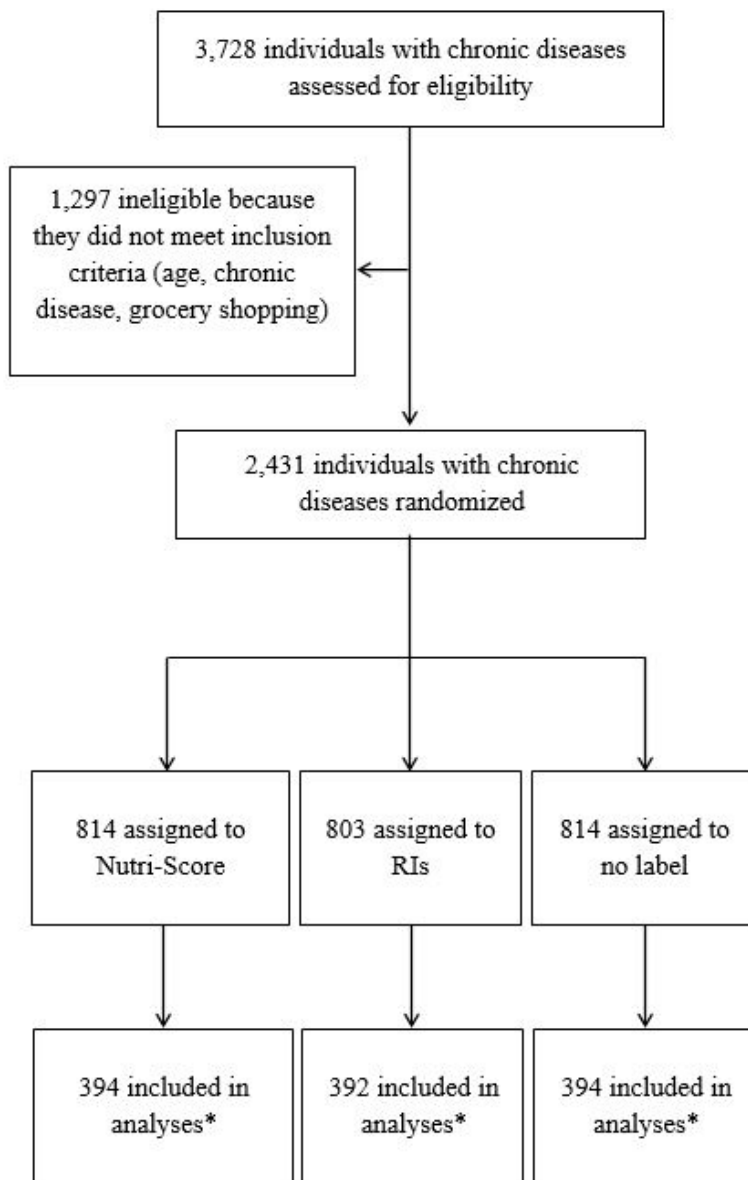

36x55mm (300 x 300 DPI)

**Table S1** Individual characteristics of respondents and non-respondents in the randomized controlled trial by randomization group, France, 2017

|                                                | Nutri-Score |                 | Reference Intakes |                 | No label    |                 | <i>P</i> <sup>a</sup> |
|------------------------------------------------|-------------|-----------------|-------------------|-----------------|-------------|-----------------|-----------------------|
|                                                | Respondents | Non-respondents | Respondents       | Non-respondents | Respondents | Non-respondents |                       |
| <b>Total (n)</b>                               | 394         | 420             | 392               | 411             | 394         | 420             |                       |
| <b>Sex, n(%)</b>                               |             |                 |                   |                 |             |                 | 0.5                   |
| Men                                            | 131 (33.2)  | 158 (37.6)      | 124 (31.6)        | 143 (34.8)      | 152 (38.6)  | 157 (37.4)      |                       |
| Women                                          | 263 (66.8)  | 262 (62.4)      | 268 (68.4)        | 268 (65.2)      | 242 (61.4)  | 263 (62.6)      |                       |
| <b>Age, years</b>                              | 64.8 ± 6.9  | 65.8 ± 7.5      | 64.8 ± 7.3        | 66.5 ± 7.1      | 65.4 ± 7.1  | 66.2 ± 7.2      | 0.5                   |
| <b>Educational level</b>                       |             |                 |                   |                 |             |                 | 0.2                   |
| Primary                                        | 122 (31)    | 131 (31.2)      | 102 (26)          | 140 (34.1)      | 104 (26.4)  | 131 (31.2)      |                       |
| Secondary                                      | 53 (13.5)   | 83 (19.8)       | 51 (13)           | 77 (18.7)       | 74 (18.8)   | 71 (16.9)       |                       |
| University, undergraduate degree               | 103 (26.1)  | 94 (22.4)       | 122 (31.1)        | 98 (23.8)       | 99 (25.1)   | 103 (24.5)      |                       |
| University, postgraduate degree                | 98 (24.9)   | 93 (22.1)       | 102 (26)          | 77 (18.7)       | 103 (26.1)  | 102 (24.3)      |                       |
| Other                                          | 18 (4.6)    | 19 (4.5)        | 15 (3.8)          | 19 (4.6)        | 14 (3.6)    | 13 (3.1)        |                       |
| <b>Grocery shopping frequency, n(%)</b>        |             |                 |                   |                 |             |                 | 0.6                   |
| Always                                         | 231 (58.6)  | 235 (56)        | 252 (64.3)        | 229 (55.7)      | 239 (60.7)  | 245 (58.3)      |                       |
| Often                                          | 122 (31)    | 134 (31.9)      | 107 (27.3)        | 128 (31.1)      | 113 (28.7)  | 127 (30.2)      |                       |
| Sometimes                                      | 41 (10.4)   | 51 (12.1)       | 33 (8.4)          | 54 (13.1)       | 42 (10.7)   | 48 (11.4)       |                       |
| <b>Online grocery shopping, yes n(%)</b>       | 119 (30.2)  | 96 (22.9)       | 129 (32.9)        | 102 (24.8)      | 103 (26.1)  | 109 (26)        | 0.2                   |
| <b>Online grocery shopping frequency, n(%)</b> |             |                 |                   |                 |             |                 | 0.4                   |
| At least one time per week                     | 16 (13.4)   | 8 (8.3)         | 20 (15.5)         | 14 (13.7)       | 21 (20.4)   | 13 (11.9)       |                       |
| One or two times per month                     | 22 (18.5)   | 25 (26)         | 26 (20.2)         | 20 (19.6)       | 15 (14.6)   | 25 (22.9)       |                       |
| One time every two or three months             | 29 (24.4)   | 15 (15.6)       | 33 (25.6)         | 23 (22.5)       | 17 (16.5)   | 22 (20.2)       |                       |
| One or two times per year                      | 23 (19.3)   | 23 (24)         | 21 (16.3)         | 29 (28.4)       | 29 (28.2)   | 32 (29.4)       |                       |
| Less than one time per year                    | 29 (24.4)   | 25 (26)         | 29 (22.5)         | 16 (15.7)       | 21 (20.4)   | 17 (15.6)       |                       |
| <b>Weekly budget for grocery shopping (€)</b>  |             |                 |                   |                 |             |                 | 0.2                   |
| ≤30€                                           | 13 (3.3)    | 20 (4.8)        | 17 (4.3)          | 10 (2.4)        | 16 (4.1)    | 6 (1.4)         |                       |
| 30 – 50€                                       | 76 (19.3)   | 65 (15.5)       | 74 (18.9)         | 78 (19)         | 63 (16)     | 65 (15.5)       |                       |
| 50 – 100€                                      | 151 (38.3)  | 159 (37.9)      | 168 (42.9)        | 158 (38.4)      | 160 (40.6)  | 164 (39)        |                       |
| ≥100€                                          | 151 (38.3)  | 154 (36.7)      | 130 (33.2)        | 140 (34.1)      | 147 (37.3)  | 167 (39.8)      |                       |
| Missing                                        | 3 (0.8)     | 22 (5.2)        | 3 (0.8)           | 25 (6.1)        | 8 (2)       | 18 (4.3)        |                       |
| <b>Perceived nutritional knowledge, n(%)</b>   |             |                 |                   |                 |             |                 | 0.1                   |
| High                                           | 38 (9.6)    | 33 (7.9)        | 38 (9.7)          | 26 (6.3)        | 22 (5.6)    | 44 (10.5)       |                       |
| Intermediate                                   | 222 (56.3)  | 226 (53.8)      | 220 (56.1)        | 231 (56.2)      | 233 (59.1)  | 221 (52.6)      |                       |
| Low                                            | 125 (31.7)  | 135 (32.1)      | 125 (31.9)        | 125 (30.4)      | 124 (31.5)  | 132 (31.4)      |                       |
| No                                             | 9 (2.3)     | 9 (2.1)         | 7 (1.8)           | 7 (1.7)         | 9 (2.3)     | 6 (1.4)         |                       |
| Missing data                                   | 0           | 17 (4)          | 2 (0.5)           | 22 (5.4)        | 6 (1.5)     | 17 (4)          |                       |
| <b>Nutrition facts reading frequency, n(%)</b> |             |                 |                   |                 |             |                 | 0.3                   |
| Always                                         | 63 (16)     | 68 (16.2)       | 55 (14)           | 58 (14.1)       | 54 (13.7)   | 71 (16.9)       |                       |
| Often                                          | 202 (51.3)  | 190 (45.2)      | 199 (50.8)        | 210 (51.1)      | 206 (52.3)  | 177 (42.1)      |                       |
| Sometimes                                      | 117 (29.7)  | 127 (30.2)      | 122 (31.1)        | 106 (25.8)      | 119 (30.2)  | 142 (33.8)      |                       |
| Never                                          | 12 (3)      | 18 (4.3)        | 14 (3.6)          | 15 (3.6)        | 9 (2.3)     | 13 (3.1)        |                       |
| Missing data                                   | 0           | 17 (4)          | 2 (0.5)           | 22 (5.4)        | 6 (1.5)     | 17 (4)          |                       |

Values are mean ± standard deviation or n (%) as appropriate.

<sup>a</sup> A multivariable logistic regression was conducted to model the probability of non-response depending on the individual sociodemographic and lifestyle characteristics and the arm of randomization. The *P* corresponds to the p-value of the interaction term between the individual characteristic and the trial arm. The comparison of the educational level and weekly budget for grocery shopping variables between respondents and non-respondents were not performed given that information was missing for non-respondents.

**Table S2** Overall nutritional quality, energy and nutrient content for 100g of the shopping cart among labelled products only

|                                                   | Nutri-Score     | Reference Intakes | No label       | P-value           | Nutri-Score vs no label |                      | Nutri-Score vs Reference Intakes |                      | Reference Intakes vs no label |                      |
|---------------------------------------------------|-----------------|-------------------|----------------|-------------------|-------------------------|----------------------|----------------------------------|----------------------|-------------------------------|----------------------|
|                                                   | N=369           | N=390             | N=392          |                   | Difference <sup>a</sup> | P-value <sup>b</sup> | Difference <sup>a</sup>          | P-value <sup>b</sup> | Difference <sup>a</sup>       | P-value <sup>b</sup> |
| Overall nutritional quality (FSAm-NPS score/100g) | 4.35 (3.5)      | 4.27 (3.43)       | 4.49 (3.41)    | 0.7               | -0.13 (-0.72;0.45)      | 0.9                  | 0.08 (-0.51;0.67)                | 0.9                  | -0.21 (-0.79;0.36)            | 0.7                  |
| Calories (kcal/100g)                              | 188.42 (111.64) | 237.94 (80.74)    | 226.59 (85.24) | <b>&lt;0.0001</b> | -38.16 (-54.02;-22.3)   | <b>&lt;0.0001</b>    | -49.52 (-65.39;-33.64)           | <b>&lt;0.0001</b>    | 11.35 (-4.28;26.99)           | 0.2                  |
| Saturated fatty acids (g/100g)                    | 4.60 (4.48)     | 5.34 (2.97)       | 5.43 (3.28)    | <b>0.003</b>      | -0.83 (-1.45;-0.22)     | <b>0.004</b>         | -0.74 (-1.36;-0.13)              | <b>0.01</b>          | -0.09 (-0.70;0.52)            | 0.9                  |
| Sugars (g/100)                                    | 5.80 (5.16)     | 6.45 (4.23)       | 6.43 (6.00)    | 0.1               | -0.63 (-1.51;0.25)      | 0.2                  | -0.66 (-1.54;0.23)               | 0.2                  | 0.03 (-0.84;0.9)              | 1.0                  |
| Sodium (mg/100g)                                  | 267.67 (284.89) | 252.19 (130.25)   | 267.10 (200.7) |                   |                         |                      |                                  |                      |                               |                      |
| Fiber (g/100g)                                    | 1.45 (1.56)     | 2.27 (1.74)       | 1.95 (1.54)    |                   |                         |                      |                                  |                      |                               |                      |
| Fruits and vegetables (%)                         | 17.98 (20.94)   | 17.48 (13.99)     | 16.95 (12.61)  |                   |                         |                      |                                  |                      |                               |                      |
| Proteins (g/100g)                                 | 6.35 (4.31)     | 7.89 (2.87)       | 7.99 (3.92)    |                   |                         |                      |                                  |                      |                               |                      |

<sup>a</sup> Mean difference (95% Confidence Interval)<sup>b</sup> P-value using Tukey's multiple comparisons tests. Boldface indicates statistical significance (p-value≤0.05). FSAm-NPS: modified Food Standards Agency Nutrient Profiling System.**Table S3** Sensitivity analyses: overall nutritional quality, energy and nutrient content for 100g of the shopping cart excluding outliers on the spending amount

|                                                   | Nutri-Score     | Reference Intakes | No label       | P-value           | Nutri-Score vs no label |                      | Nutri-Score vs Reference Intakes |                      | Reference Intakes vs no label |                      |
|---------------------------------------------------|-----------------|-------------------|----------------|-------------------|-------------------------|----------------------|----------------------------------|----------------------|-------------------------------|----------------------|
|                                                   | N=351           | N=354             | N=357          |                   | Difference <sup>a</sup> | P-value <sup>b</sup> | Difference <sup>a</sup>          | P-value <sup>b</sup> | Difference <sup>a</sup>       | P-value <sup>b</sup> |
| Overall nutritional quality (FSAm-NPS score/100g) | 0.99 (3.30)     | 1.69 (2.84)       | 1.8 (2.58)     | <b>0.0004</b>     | -0.81 (-1.32;-0.29)     | <b>0.0007</b>        | -0.69 (-1.21;-0.17)              | <b>0.005</b>         | -0.12 (-0.63;0.40)            | 0.9                  |
| Calories (kcal/100g)                              | 152.06 (74.84)  | 180.89 (58.10)    | 173.53 (57.8)  | <b>&lt;0.0001</b> | -21.47 (-32.77;-10.17)  | <b>&lt;0.0001</b>    | -28.83 (-40.15;-17.51)           | <b>&lt;0.0001</b>    | 7.36 (-3.91;18.63)            | 0.3                  |
| Saturated fatty acids (g/100g)                    | 3.19 (2.73)     | 3.76 (2.02)       | 3.78 (2.03)    | <b>0.0005</b>     | -0.59 (-0.99;-0.18)     | <b>0.002</b>         | -0.58 (-0.98;-0.17)              | <b>0.002</b>         | -0.01 (-0.41;0.39)            | 1.0                  |
| Sugars (g/100)                                    | 5.9 (3.31)      | 5.79 (2.93)       | 5.61 (3.10)    | 0.5               | 0.29 (-0.26;0.84)       | 0.4                  | 0.11 (-0.44;0.66)                | 0.9                  | 0.18 (-0.36;0.73)             | 0.7                  |
| Sodium (mg/100g)                                  | 171.75 (144.16) | 193.37 (96.17)    | 205.5 (143.31) |                   |                         |                      |                                  |                      |                               |                      |
| Fiber (g/100g)                                    | 1.41 (1.01)     | 1.91 (1.17)       | 1.67 (0.96)    |                   |                         |                      |                                  |                      |                               |                      |
| Fruits and vegetables (%)                         | 35.29 (22.57)   | 30.66 (14.69)     | 30.11 (13.93)  |                   |                         |                      |                                  |                      |                               |                      |
| Proteins (g/100g)                                 | 7.30 (3.25)     | 7.25 (2.03)       | 7.53 (2.92)    |                   |                         |                      |                                  |                      |                               |                      |

<sup>a</sup> Mean difference (95% Confidence Interval)<sup>b</sup> P-value using Tukey's multiple comparisons tests. Boldface indicates statistical significance (p-value≤0.05). Participants whose spending amount was below the 5<sup>th</sup> or over the 95<sup>th</sup> percentile of the distribution of the cost of the shopping carts in the sample were excluded. FSAm-NPS: modified Food Standards Agency Nutrient Profiling System.

1  
2  
3  
4  
5  
6  
7  
8  
9  
10  
11  
12  
13  
14  
15  
16  
17  
18  
19  
20  
21  
22  
23  
24  
25  
26  
27  
28  
29  
30  
31  
32  
33  
34  
35  
36  
37  
38  
39  
40  
41  
42  
43  
44  
45  
46

**Table S4** Sensitivity analyses using multiple imputations: overall nutritional quality, energy and nutrient content for 100g of the shopping cart

|                                                   | Nutri-Score     | Reference Intakes | No label        | P-value       | Nutri-Score vs no label |                      | Nutri-Score vs Reference Intakes |                      | Reference Intakes vs no label |                      |
|---------------------------------------------------|-----------------|-------------------|-----------------|---------------|-------------------------|----------------------|----------------------------------|----------------------|-------------------------------|----------------------|
|                                                   | N=814           | N=803             | N=814           |               | Difference <sup>a</sup> | P-value <sup>b</sup> | Difference <sup>a</sup>          | P-value <sup>b</sup> | Difference <sup>a</sup>       | P-value <sup>b</sup> |
| Overall nutritional quality (FSAm-NPS score/100g) | 1.51 (1.87)     | 1.78 (1.87)       | 1.84 (2.04)     | 0.1           | -0.33 (-0.69;0.03)      | 0.07                 | -0.27 (-0.63;0.08)               | 0.1                  | -0.06 (-0.43;0.32)            | 0.8                  |
| Calories (kcal/100g)                              | 162.95 (41.32)  | 177.21 (39.24)    | 173.24 (44.67)  | <b>0.0009</b> | -10.28 (-18.26;2.31)    | <b>0.01</b>          | -14.26 (-21.87;6.65)             | <b>0.0003</b>        | 3.98 (-4.09;12.05)            | 0.3                  |
| Saturated fatty acids (g/100g)                    | 3.43 (1.62)     | 3.68 (1.41)       | 3.70 (1.64)     | 0.1           | -0.27 (-0.56;0.02)      | 0.07                 | -0.25 (-0.54;0.04)               | 0.1                  | -0.02 (-0.32;0.28)            | 0.9                  |
| Sugars (g/100g)                                   | 5.86 (2.11)     | 5.86 (2.02)       | 5.74 (2.22)     | 0.6           | 0.12 (-0.32;0.55)       | 0.6                  | -0.01 (-0.46;0.45)               | 1.0                  | 0.12 (-0.30;0.54)             | 0.6                  |
| Sodium (mg/100g)                                  | 194.73 (102.46) | 196.38 (97.05)    | 205.54 (113.03) |               |                         |                      |                                  |                      |                               |                      |
| Fiber (g/100g)                                    | 1.51 (0.62)     | 1.76 (0.64)       | 1.64 (0.68)     |               |                         |                      |                                  |                      |                               |                      |
| Fruits and vegetables (%)                         | 32.25 (10.94)   | 30.12 (10.35)     | 29.78 (11.19)   |               |                         |                      |                                  |                      |                               |                      |
| Proteins (g/100g)                                 | 7.41 (1.73)     | 7.35 (1.86)       | 7.48 (1.97)     |               |                         |                      |                                  |                      |                               |                      |

<sup>a</sup> Mean difference (95% Confidence Interval)

<sup>b</sup> P-value using Tukey's multiple comparisons tests. Boldface indicates statistical significance (p-value≤0.05). FSAm-NPS: modified Food Standards Agency Nutrient Profiling System.

**Table S5** Sensitivity analyses using multiple imputations: overall nutritional quality, energy and nutrient content for 100g of the shopping cart among labelled products only

|                                                   | Nutri-Score     | Reference Intakes | No label        | P-value      | Nutri-Score vs no label |                      | Nutri-Score vs Reference Intakes |                      | Reference Intakes vs no label |                      |
|---------------------------------------------------|-----------------|-------------------|-----------------|--------------|-------------------------|----------------------|----------------------------------|----------------------|-------------------------------|----------------------|
|                                                   | N=789           | N=801             | N=812           |              | Difference <sup>a</sup> | P-value <sup>b</sup> | Difference <sup>a</sup>          | P-value <sup>b</sup> | Difference <sup>a</sup>       | P-value <sup>b</sup> |
| Overall nutritional quality (FSAm-NPS score/100g) | 3.51 (11.8)     | 3.52 (11.82)      | 3.61 (11.53)    | 0.6          | -0.10 (-0.57;0.36)      | 0.7                  | -0.01 (-0.46;0.43)               | 1.0                  | -0.09 (-0.53;0.35)            | 0.7                  |
| Calories (kcal/100g)                              | 176.66 (343.52) | 201.81 (344.94)   | 195.53 (330.17) | <b>0.001</b> | -18.87 (-31.27;-6.5)    | <b>0.003</b>         | -25.15 (-38.22;-12.09)           | <b>0.0002</b>        | -6.29 (-5.17;17.74)           | 0.3                  |
| Saturated fatty acids (g/100g)                    | 3.97 (14.84)    | 4.34 (15.04)      | 4.37 (14.67)    | 0.2          | -0.41 (-0.88;0.06)      | 0.09                 | -0.38 (-0.88;0.12)               | 0.1                  | -0.03 (-0.47;0.41)            | 0.9                  |
| Sugars (g/100g)                                   | 4.64 (19.27)    | 4.99 (19.48)      | 4.96 (19.33)    | 0.5          | -0.32 (-0.97;0.33)      | 0.3                  | -0.35 (-0.97;0.28)               | 0.3                  | 0.02 (-0.63;0.68)             | 0.9                  |
| Sodium (mg/100g)                                  | 220.7 (688.19)  | 216.53 (675.15)   | 221.69 (672.91) |              |                         |                      |                                  |                      |                               |                      |
| Fiber (g/100g)                                    | 1.43 (5.42)     | 1.83 (5.44)       | 1.68 (5.27)     |              |                         |                      |                                  |                      |                               |                      |
| Fruits and vegetables (%)                         | 16.76 (50.37)   | 16.55 (50.69)     | 16.43 (49.19)   |              |                         |                      |                                  |                      |                               |                      |
| Proteins (g/100g)                                 | 6.12 (14.32)    | 6.86 (13.06)      | 6.89 (12.84)    |              |                         |                      |                                  |                      |                               |                      |

<sup>a</sup> Mean difference (95% Confidence Interval)

<sup>b</sup> P-value using Tukey's multiple comparisons tests. Boldface indicates statistical significance (p-value≤0.05). FSAm-NPS: modified Food Standards Agency Nutrient Profiling System.

**Table S6** Total quantities of calories and nutrients in the shopping carts purchased in the three arms of the trial

|                           | Nutri-Score      | Reference Intakes | No label         | P-value | Nutri-Score vs no label   |                      | Nutri-Score vs Reference Intakes |                      | Reference Intakes vs no label |                      |
|---------------------------|------------------|-------------------|------------------|---------|---------------------------|----------------------|----------------------------------|----------------------|-------------------------------|----------------------|
|                           | Mean (SD)        | Mean (SD)         | Mean (SD)        |         | Difference <sup>a</sup>   | P-value <sup>b</sup> | Difference <sup>a</sup>          | P-value <sup>b</sup> | Difference <sup>a</sup>       | P-value <sup>b</sup> |
| Calories (kcal)           | 2229.74(2336.45) | 3395.80(2232.5)   | 3173.73(2235.09) | <0.0001 | -943.99(-1323.29;-564.7)  | <0.0001              | -1166.06(-1545.84;-786.29)       | <0.0001              | 222.07(-157.71;601.85)        | 0.4                  |
| Saturated fatty acids (g) | 35.88(40.21)     | 53.08(37.21)      | 52.60(38.35)     | <0.0001 | -16.72(-23.18;-10.27)     | <0.0001              | -17.20(-23.66;-10.73)            | <0.0001              | 0.47(-5.99;6.94)              | 1.0                  |
| Sugars (g)                | 78.09(71.76)     | 116.70(90.74)     | 103.08(79.66)    | <0.0001 | -24.99(-38.54;-11.43)     | <0.0001              | -38.60(-52.17;-25.03)            | <0.0001              | 13.61(0.04;27.19)             | <b>0.05</b>          |
| Sodium (mg)               | 1914.81(2121.69) | 2875.46(2298.01)  | 2803.92(2232.81) | <0.0001 | -889.11(-1260.04;-518.19) | <0.0001              | -960.66(-1332.06;-589.26)        | <0.0001              | 71.54(-299.86;442.95)         | 0.9                  |
| Fiber (g)                 | 17.13(17.45)     | 29.81(21.11)      | 26.17(20.05)     | <0.0001 | -9.04(-12.32;-5.76)       | <0.0001              | -12.68(-15.96;-9.4)              | <0.0001              | 3.64(0.36;6.92)               | <b>0.03</b>          |
| Proteins (g)              | 98.66(92.33)     | 145.51(93.35)     | 142.44(94.72)    | <0.0001 | -43.78(-59.41;-28.15)     | <0.0001              | -46.85(-62.5;-31.2)              | <0.0001              | 3.07(-12.58;18.72)            | 0.9                  |

<sup>a</sup> Mean difference (95% Confidence Interval)

<sup>b</sup> P-value using Tukey's multiple comparisons tests. Boldface indicates statistical significance (p-value≤0.05). SD: Standard Deviation

**Table S7** Percentage of the number of products in the shopping cart from the different food categories

| Food groups                                             | Nutri-Score  | Reference Intakes | No label     |
|---------------------------------------------------------|--------------|-------------------|--------------|
| <b>Fruits, vegetables, legumes, grains and starches</b> |              |                   |              |
| Fresh fruits                                            | 17,69(22,1)  | 7,14(6,76)        | 7,07(6,68)   |
| Processed fruits                                        | 1,96(8,99)   | 0,73(1,72)        | 0,82(2,05)   |
| Fresh vegetables                                        | 6,13(10,74)  | 10,76(9,87)       | 9,73(8,82)   |
| Processed vegetables                                    | 2,79(5,09)   | 4,22(5,14)        | 3,43(4,69)   |
| Legumes and potatoes                                    | 1,50(3,45)   | 3,08(4,64)        | 2,49(5,28)   |
| Seeds and dried fruits                                  | 0,81(2,44)   | 0,83(1,82)        | 1,08(3,14)   |
| <b>Dairy products</b>                                   | 10,25(11,77) | 12,46(10,36)      | 13,33(14,06) |
| <b>Cheeses</b>                                          | 2,96(5,01)   | 4,84(7,39)        | 5,17(6,15)   |
| <b>Meat, fish and processed foods</b>                   |              |                   |              |
| Pre-packed meat                                         | 0,11(0,68)   | 0,20(0,99)        | 0,21(0,83)   |
| Meat                                                    | 12,52(14,99) | 6,02(6,04)        | 6,94(10,14)  |
| Processed meats                                         | 4,64(11,25)  | 3,35(4,93)        | 3,5(5,25)    |
| Fresh fish                                              | 2,66(6,6)    | 2,71(5,94)        | 2,44(3,51)   |
| Processed fish                                          | 0,51(1,84)   | 0,68(1,89)        | 0,79(3)      |
| Sea delicatessen and canned fish                        | 1,85(3,88)   | 2,58(3,83)        | 3,67(10,21)  |
| <b>Sweet products</b>                                   |              |                   |              |
| Biscuits                                                | 1,09(2,95)   | 2,40(8,16)        | 1,17(2,26)   |
| Sweets                                                  | 3,17(5,26)   | 5,24(5,39)        | 4,88(6,35)   |
| Breakfast cereals                                       | 0,18(0,86)   | 0,32(1,27)        | 0,26(1,11)   |
| Breads, rusks and pastries                              | 1,78(4,90)   | 2,53(4,19)        | 3,56(9,43)   |
| Ice creams                                              | 0,58(1,84)   | 0,73(2,09)        | 0,71(2,39)   |
| <b>Salty products</b>                                   |              |                   |              |
| Prepared dishes                                         | 1,26(3,39)   | 2,06(6,4)         | 1,75(3,68)   |
| Pasta, rice, mashed potatoes and semolina               | 2,21(4,07)   | 4,68(9,44)        | 3,47(5,85)   |
| Savoury aperitif products                               | 0,44(1,40)   | 1,05(2,85)        | 0,66(1,79)   |
| Salads                                                  | 0,35(1,34)   | 0,40(1,53)        | 0,18(0,95)   |
| Soups                                                   | 0,49(2,21)   | 1,12(6,57)        | 1,08(7,57)   |
| Sauces and condiments                                   | 3,75(9,23)   | 3,86(4,47)        | 4,26(6,07)   |
| <b>Oils and fats</b>                                    | 4,43(9,22)   | 4,06(4,02)        | 3,92(4,04)   |
| <b>Beverages</b>                                        |              |                   |              |
| Waters                                                  | 8,95(14,68)  | 5,96(8,85)        | 8,71(16,74)  |
| Fruit juices                                            | 2,36(6,58)   | 1,52(5,77)        | 1,07(2,55)   |
| Sweetened drinks and sodas                              | 2,58(5,50)   | 4,48(6,51)        | 3,64(4,38)   |

Values correspond to mean (Standard deviation).

**Table S8** Percent contributions of food groups to nutrient intakes of the overall shopping cart

| Food groups                                             | Calories     |                   |              | Saturated Fatty Acids |                   |              |
|---------------------------------------------------------|--------------|-------------------|--------------|-----------------------|-------------------|--------------|
|                                                         | Nutri-Score  | Reference Intakes | No label     | Nutri-Score           | Reference Intakes | No label     |
| <b>Fruits, vegetables, legumes, grains and starches</b> |              |                   |              |                       |                   |              |
| Fresh fruits                                            | 12,03(21,1)  | 2,76(4,93)        | 2,53(2,98)   | 5,64(21,07)           | 0,43(5,11)        | 0,12(0,29)   |
| Processed fruits                                        | 1,46(8,67)   | 0,31(0,91)        | 0,34(0,88)   | 0,92(8,48)            | 0,06(0,49)        | 0,05(0,15)   |
| Fresh vegetables                                        | 1,93(6,41)   | 2,48(3,77)        | 2,06(2,48)   | 0,82(7,1)             | 0,30(1,19)        | 0,15(0,24)   |
| Processed vegetables                                    | 0,92(2,29)   | 1,38(2,42)        | 1,18(3,18)   | 0,48(4,45)            | 0,43(1,60)        | 0,36(1,19)   |
| Legumes and potatoes                                    | 2,47(5,55)   | 5,15(8,23)        | 4,10(7,97)   | 0,39(2,42)            | 0,63(3,61)        | 0,78(5,35)   |
| Seeds and dried fruits                                  | 2,19(5,88)   | 2,33(5,16)        | 2,97(6,77)   | 1,49(4,68)            | 1,60(4,44)        | 1,87(6,25)   |
| <b>Oils and fats</b>                                    | 7,61(11,16)  | 8,01(8,74)        | 9,57(13,59)  | 10,79(16,63)          | 12,86(15,25)      | 14,02(18,27) |
| <b>Beverages</b>                                        | 5,38(9,19)   | 8,32(11,10)       | 9,81(10,39)  | 11,87(18,7)           | 19,59(21,72)      | 22,38(21,8)  |
| <b>Meat, fish and processed foods</b>                   |              |                   |              |                       |                   |              |
| Pre-packed meat                                         | 0,08(0,52)   | 0,20(1,20)        | 0,23(0,98)   | 0,1(0,81)             | 0,37(3,46)        | 0,37(1,85)   |
| Meat                                                    | 18,07(24,94) | 6,51(8,20)        | 7,63(12,95)  | 22,31(34,83)          | 6,99(12,52)       | 6,25(12,70)  |
| Processed meats                                         | 4,77(11,74)  | 3,68(7,20)        | 3,84(5,55)   | 5,66(15,52)           | 4,29(9,25)        | 4,65(9,43)   |
| Fresh fish                                              | 2,17(7,01)   | 2,2(6,38)         | 1,62(2,62)   | 1,69(8,35)            | 1,46(7,16)        | 0,67(1,69)   |
| Processed fish                                          | 0,38(1,58)   | 0,58(2,17)        | 0,63(2,16)   | 0,22(1,05)            | 0,45(3,01)        | 0,46(2,49)   |
| Sea delicatessen and canned fish                        | 1,92(5,13)   | 2,64(4,66)        | 3,51(10,18)  | 1,43(5,13)            | 1,85(4,58)        | 2,41(9,00)   |
| <b>Sweet products</b>                                   |              |                   |              |                       |                   |              |
| Biscuits                                                | 2,41(5,96)   | 4,77(11,63)       | 3,05(6,08)   | 2,23(6,55)            | 4,9(13,55)        | 2,75(6,73)   |
| Sweets                                                  | 5,54(10,11)  | 8,64(9,86)        | 8,42(10,7)   | 7,24(14,58)           | 11,47(16,33)      | 10,06(14,67) |
| Breakfast cereals                                       | 0,33(1,55)   | 0,66(2,51)        | 0,58(2,45)   | 0,10(0,54)            | 0,25(1,34)        | 0,15(0,77)   |
| Breads, rusks and pastries                              | 3,16(7,95)   | 4,28(6,62)        | 5,76(11,22)  | 0,94(3,49)            | 0,94(2,46)        | 2,09(10,59)  |
| Ice creams                                              | 0,50(1,58)   | 0,7(2,44)         | 0,65(2,83)   | 0,89(3,63)            | 1,10(4,07)        | 0,82(3,77)   |
| <b>Salty products</b>                                   |              |                   |              |                       |                   |              |
| Prepared dishes                                         | 1,44(3,66)   | 2,24(6,88)        | 2,22(4,84)   | 1,25(3,46)            | 2,07(7,24)        | 2,06(7,47)   |
| Pasta, rice, mashed potatoes and semolina               | 4,05(7,18)   | 8,37(13,13)       | 6,57(9,03)   | 0,86(3,79)            | 2,33(10,33)       | 1,10(3,15)   |
| Savoury aperitif products                               | 0,97(3,09)   | 2,30(5,50)        | 1,6(4,26)    | 0,43(1,82)            | 1,16(3,53)        | 0,76(2,21)   |
| Salads                                                  | 0,21(0,83)   | 0,25(1,06)        | 0,12(0,67)   | 0,08(0,34)            | 0,12(0,62)        | 0,04(0,22)   |
| Soups                                                   | 0,16(1,29)   | 0,57(5,53)        | 0,67(7,40)   | 0,15(1,35)            | 0,52(5,39)        | 0,61(7,41)   |
| Sauces and condiments                                   | 2,72(8,87)   | 1,94(3,23)        | 2,20(5,24)   | 1,90(8,97)            | 0,96(2,07)        | 1,14(4,45)   |
| <b>Oils and fats</b>                                    | 14,60(18,45) | 16,48(14,66)      | 16,68(15,00) | 19,52(25,10)          | 21,53(20,74)      | 22,84(21,77) |
| <b>Beverages</b>                                        |              |                   |              |                       |                   |              |
| Waters                                                  | 0(0,03)      | 0(0,03)           | 0(0,03)      | 0(0,05)               | 0(0,10)           | 0,01(0,11)   |
| Fruit juices                                            | 1,26(4,70)   | 0,63(5,25)        | 0,36(1,03)   | 0(0)                  | 0(0)              | 0(0)         |
| Sweetened drinks and sodas                              | 1,29(5,36)   | 1,62(4,61)        | 1,12(3,61)   | 0,62(3,36)            | 1,36(5,99)        | 1,04(4,14)   |

The relatively high contributions of calories and saturated fatty acids for fruits and vegetables in the Nutri-Score arm could be partly explained by participants having only fruits or vegetables in their shopping carts, thus increasing the overall contribution at the sample level, even though they are low in calories and saturated fatty acids.



1  
2  
3  
4  
5  
6  
7  
8  
9  
10  
11  
12  
13  
14  
15  
16  
17  
18  
19  
20  
21  
22  
23  
24  
25  
26  
27  
28  
29  
30  
31  
32  
33  
34  
35  
36  
37  
38  
39  
40  
41  
42  
43  
44  
45  
46

**Table S9** Distribution of the products across the five Nutri-Score classes

| Nutri-Score | Nutri-Score     | Reference Intakes | No label        | P-value           | Nutri-Score vs no label |                      | Nutri-Score vs Reference Intakes |                      | Reference Intakes vs no label |                      |
|-------------|-----------------|-------------------|-----------------|-------------------|-------------------------|----------------------|----------------------------------|----------------------|-------------------------------|----------------------|
|             | Mean proportion | Mean proportion   | Mean proportion |                   | Difference <sup>a</sup> | P-value <sup>b</sup> | Difference <sup>a</sup>          | P-value <sup>b</sup> | Difference <sup>a</sup>       | P-value <sup>b</sup> |
| A           | 58.16±25.02     | 53.3±20.26        | 52.53±20.07     | <b>0.0004</b>     | 5.63(2.02;9.24)         | <b>0.0008</b>        | 4.85(1.24;8.47)                  | <b>0.005</b>         | 0.78(-2.86;4.41)              | 0.9                  |
| B           | 10.55±10.43     | 13.87±10.09       | 15.55±14.14     | <b>&lt;0.0001</b> | -5.01(-6.93;-3.08)      | <b>&lt;0.0001</b>    | -3.33(-5.26;-1.4)                | <b>0.0002</b>        | -1.68(-3.62;0.26)             | 0.1                  |
| C           | 15.60±19.08     | 12.14±10.82       | 11.52±11.2      | <b>&lt;0.0001</b> | 4.08(1.73;6.43)         | <b>0.0001</b>        | 3.46(1.10;5.81)                  | <b>0.002</b>         | 0.62(-1.74;2.99)              | 0.8                  |
| D           | 12.30±12.92     | 16.05±11.51       | 15.98±12.02     | <b>&lt;0.0001</b> | -3.68(-5.69;-1.68)      | <b>&lt;0.0001</b>    | -3.75(-5.76;-1.74)               | <b>&lt;0.0001</b>    | 0.06(-1.95;2.08)              | 1.0                  |
| E           | 3.40±5.69       | 4.63±8.57         | 4.42±5.42       | <b>0.02</b>       | -1.02(-2.12;0.08)       | 0.07                 | -1.23(-2.34;-0.13)               | <b>0.02</b>          | 0.21(-0.90;1.33)              | 0.9                  |

<sup>a</sup> Mean difference (95% Confidence Interval)

<sup>b</sup> P-value using Tukey's multiple comparisons tests. Boldface indicates statistical significance (p-value≤0.05). All products were taken into account, including also raw foods that were non-labelled.

1  
2  
3  
4  
5  
6  
7  
8  
9  
10  
11  
12  
13  
14  
15  
16  
17  
18  
19  
20  
21  
22  
23  
24  
25  
26  
27  
28  
29  
30  
31  
32  
33  
34  
35  
36  
37  
38  
39  
40  
41  
42  
43  
44  
45  
46  
47  
48  
49  
50  
51  
52  
53  
54  
55  
56  
57  
58  
59  
60

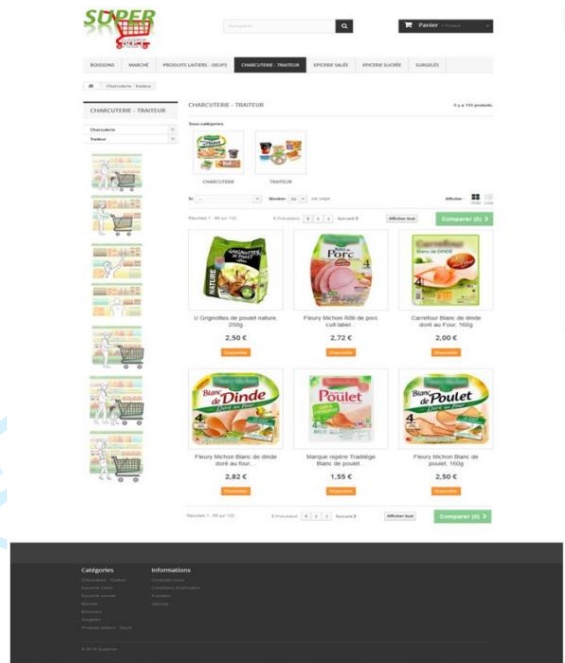

Figure S1 Screenshot of the experimental online supermarket

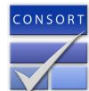

## CONSORT 2010 checklist of information to include when reporting a randomised trial\*

| Section/Topic                    | Item No | Checklist item                                                                                                                                                                              | Reported on page No |
|----------------------------------|---------|---------------------------------------------------------------------------------------------------------------------------------------------------------------------------------------------|---------------------|
| <b>Title and abstract</b>        |         |                                                                                                                                                                                             |                     |
|                                  | 1a      | Identification as a randomised trial in the title                                                                                                                                           | 1                   |
|                                  | 1b      | Structured summary of trial design, methods, results, and conclusions (for specific guidance see CONSORT for abstracts)                                                                     | 2                   |
| <b>Introduction</b>              |         |                                                                                                                                                                                             |                     |
| Background and objectives        | 2a      | Scientific background and explanation of rationale                                                                                                                                          | 3-4                 |
|                                  | 2b      | Specific objectives or hypotheses                                                                                                                                                           | 4                   |
| <b>Methods</b>                   |         |                                                                                                                                                                                             |                     |
| Trial design                     | 3a      | Description of trial design (such as parallel, factorial) including allocation ratio                                                                                                        | 4-5                 |
|                                  | 3b      | Important changes to methods after trial commencement (such as eligibility criteria), with reasons                                                                                          | NA                  |
| Participants                     | 4a      | Eligibility criteria for participants                                                                                                                                                       | 5                   |
|                                  | 4b      | Settings and locations where the data were collected                                                                                                                                        | 5                   |
| Interventions                    | 5       | The interventions for each group with sufficient details to allow replication, including how and when they were actually administered                                                       | 6-7                 |
| Outcomes                         | 6a      | Completely defined pre-specified primary and secondary outcome measures, including how and when they were assessed                                                                          | 8                   |
|                                  | 6b      | Any changes to trial outcomes after the trial commenced, with reasons                                                                                                                       | NA                  |
| Sample size                      | 7a      | How sample size was determined                                                                                                                                                              | 8                   |
|                                  | 7b      | When applicable, explanation of any interim analyses and stopping guidelines                                                                                                                | NA                  |
| <b>Randomisation:</b>            |         |                                                                                                                                                                                             |                     |
| Sequence generation              | 8a      | Method used to generate the random allocation sequence                                                                                                                                      | 5-6                 |
|                                  | 8b      | Type of randomisation; details of any restriction (such as blocking and block size)                                                                                                         | 5                   |
| Allocation concealment mechanism | 9       | Mechanism used to implement the random allocation sequence (such as sequentially numbered containers), describing any steps taken to conceal the sequence until interventions were assigned | NA                  |
| Implementation                   | 10      | Who generated the random allocation sequence, who enrolled participants, and who assigned participants to interventions                                                                     | 5                   |
| Blinding                         | 11a     | If done, who was blinded after assignment to interventions (for example, participants, care providers, those                                                                                | NA                  |

|                                                      |     |                                                                                                                                                   |          |
|------------------------------------------------------|-----|---------------------------------------------------------------------------------------------------------------------------------------------------|----------|
|                                                      |     | assessing outcomes) and how                                                                                                                       |          |
|                                                      | 11b | If relevant, description of the similarity of interventions                                                                                       | NA       |
| Statistical methods                                  | 12a | Statistical methods used to compare groups for primary and secondary outcomes                                                                     | 8-9      |
|                                                      | 12b | Methods for additional analyses, such as subgroup analyses and adjusted analyses                                                                  | 9        |
| <b>Results</b>                                       |     |                                                                                                                                                   |          |
| Participant flow (a diagram is strongly recommended) | 13a | For each group, the numbers of participants who were randomly assigned, received intended treatment, and were analysed for the primary outcome    | 9        |
|                                                      | 13b | For each group, losses and exclusions after randomisation, together with reasons                                                                  | Figure 2 |
| Recruitment                                          | 14a | Dates defining the periods of recruitment and follow-up                                                                                           | 4-5      |
|                                                      | 14b | Why the trial ended or was stopped                                                                                                                | NA       |
| Baseline data                                        | 15  | A table showing baseline demographic and clinical characteristics for each group                                                                  | Table 1  |
| Numbers analysed                                     | 16  | For each group, number of participants (denominator) included in each analysis and whether the analysis was by original assigned groups           | Figure 2 |
| Outcomes and estimation                              | 17a | For each primary and secondary outcome, results for each group, and the estimated effect size and its precision (such as 95% confidence interval) | 12       |
|                                                      | 17b | For binary outcomes, presentation of both absolute and relative effect sizes is recommended                                                       | NA       |
| Ancillary analyses                                   | 18  | Results of any other analyses performed, including subgroup analyses and adjusted analyses, distinguishing pre-specified from exploratory         | 14       |
| Harms                                                | 19  | All important harms or unintended effects in each group (for specific guidance see CONSORT for harms)                                             | NA       |
| <b>Discussion</b>                                    |     |                                                                                                                                                   |          |
| Limitations                                          | 20  | Trial limitations, addressing sources of potential bias, imprecision, and, if relevant, multiplicity of analyses                                  | 17       |
| Generalisability                                     | 21  | Generalisability (external validity, applicability) of the trial findings                                                                         | 17       |
| Interpretation                                       | 22  | Interpretation consistent with results, balancing benefits and harms, and considering other relevant evidence                                     | 15-17    |
| <b>Other information</b>                             |     |                                                                                                                                                   |          |
| Registration                                         | 23  | Registration number and name of trial registry                                                                                                    | 5        |
| Protocol                                             | 24  | Where the full trial protocol can be accessed, if available                                                                                       | NA       |
| Funding                                              | 25  | Sources of funding and other support (such as supply of drugs), role of funders                                                                   | 19       |

\*We strongly recommend reading this statement in conjunction with the CONSORT 2010 Explanation and Elaboration for important clarifications on all the items. If relevant, we also recommend reading CONSORT extensions for cluster randomised trials, non-inferiority and equivalence trials, non-pharmacological treatments, herbal interventions, and pragmatic trials. Additional extensions are forthcoming: for those and for up to date references relevant to this checklist, see [www.consort-statement.org](http://www.consort-statement.org).

# BMJ Open

## Impact of the Nutri-Score front-of-pack nutrition label on purchasing intentions of individuals with chronic diseases: results of a randomized trial

|                                 |                                                                                                                                                                                                                                                                                                                                                                                                                                                                                                                                                                                                                                                                                                                                                                                                                                                                                                                                                                                                                                                                                                                                                                                                                 |
|---------------------------------|-----------------------------------------------------------------------------------------------------------------------------------------------------------------------------------------------------------------------------------------------------------------------------------------------------------------------------------------------------------------------------------------------------------------------------------------------------------------------------------------------------------------------------------------------------------------------------------------------------------------------------------------------------------------------------------------------------------------------------------------------------------------------------------------------------------------------------------------------------------------------------------------------------------------------------------------------------------------------------------------------------------------------------------------------------------------------------------------------------------------------------------------------------------------------------------------------------------------|
| Journal:                        | <i>BMJ Open</i>                                                                                                                                                                                                                                                                                                                                                                                                                                                                                                                                                                                                                                                                                                                                                                                                                                                                                                                                                                                                                                                                                                                                                                                                 |
| Manuscript ID                   | bmjopen-2021-058139.R1                                                                                                                                                                                                                                                                                                                                                                                                                                                                                                                                                                                                                                                                                                                                                                                                                                                                                                                                                                                                                                                                                                                                                                                          |
| Article Type:                   | Original research                                                                                                                                                                                                                                                                                                                                                                                                                                                                                                                                                                                                                                                                                                                                                                                                                                                                                                                                                                                                                                                                                                                                                                                               |
| Date Submitted by the Author:   | 08-Jun-2022                                                                                                                                                                                                                                                                                                                                                                                                                                                                                                                                                                                                                                                                                                                                                                                                                                                                                                                                                                                                                                                                                                                                                                                                     |
| Complete List of Authors:       | Egnell, Manon; Equipe de Recherche en Epidémiologie Nutritionnelle<br>Boutron, Isabelle; Université de Paris<br>Péneau, Sandrine; Université Paris 13 - Campus de Bobigny, Equipe de Recherche en Epidémiologie Nutritionnelle<br>Ducrot, Pauline; Santé publique France<br>Touvier, Mathilde; Université Paris 13, Equipe de Recherche en Epidémiologie Nutritionnelle, Centre de Recherche en Epidémiologie et Statistiques, Inserm (U1153), Inra (U1125), Cnam, COMUE Sorbonne Paris Cité,<br>Galan, Pilar; INRA, Equipe de Recherche en Epidémiologie Nutritionnelle<br>Fezeu, Léopold; Université Paris 13 - Campus de Bobigny, Equipe de Recherche en Epidémiologie Nutritionnelle<br>Porcher, Raphaël; Université de Paris<br>Ravaud, Philippe; Université de Paris<br>Hercberg, Serge; Université Paris 13, Equipe de Recherche en Epidémiologie Nutritionnelle (EREN), Centre d'Epidémiologie et Statistiques Sorbonne Paris Cité, Inserm (U1153), Inra (U1125), Cnam, COMUE Sorbonne Paris Cité<br>Kesse-Guyot, Emmanuelle; INRA, Equipe de Recherche en Epidémiologie Nutritionnelle<br>Julia, Chantal; Université Paris 13 - Campus de Bobigny, Equipe de Recherche en Epidémiologie Nutritionnelle |
| <b>Primary Subject Heading</b>: | Nutrition and metabolism                                                                                                                                                                                                                                                                                                                                                                                                                                                                                                                                                                                                                                                                                                                                                                                                                                                                                                                                                                                                                                                                                                                                                                                        |
| Secondary Subject Heading:      | Public health                                                                                                                                                                                                                                                                                                                                                                                                                                                                                                                                                                                                                                                                                                                                                                                                                                                                                                                                                                                                                                                                                                                                                                                                   |
| Keywords:                       | EPIDEMIOLOGY, Health policy < HEALTH SERVICES ADMINISTRATION & MANAGEMENT, NUTRITION & DIETETICS                                                                                                                                                                                                                                                                                                                                                                                                                                                                                                                                                                                                                                                                                                                                                                                                                                                                                                                                                                                                                                                                                                                |
|                                 |                                                                                                                                                                                                                                                                                                                                                                                                                                                                                                                                                                                                                                                                                                                                                                                                                                                                                                                                                                                                                                                                                                                                                                                                                 |

SCHOLARONE™  
Manuscripts



I, the Submitting Author has the right to grant and does grant on behalf of all authors of the Work (as defined in the below author licence), an exclusive licence and/or a non-exclusive licence for contributions from authors who are: i) UK Crown employees; ii) where BMJ has agreed a CC-BY licence shall apply, and/or iii) in accordance with the terms applicable for US Federal Government officers or employees acting as part of their official duties; on a worldwide, perpetual, irrevocable, royalty-free basis to BMJ Publishing Group Ltd ("BMJ") its licensees and where the relevant Journal is co-owned by BMJ to the co-owners of the Journal, to publish the Work in this journal and any other BMJ products and to exploit all rights, as set out in our [licence](#).

The Submitting Author accepts and understands that any supply made under these terms is made by BMJ to the Submitting Author unless you are acting as an employee on behalf of your employer or a postgraduate student of an affiliated institution which is paying any applicable article publishing charge ("APC") for Open Access articles. Where the Submitting Author wishes to make the Work available on an Open Access basis (and intends to pay the relevant APC), the terms of reuse of such Open Access shall be governed by a Creative Commons licence – details of these licences and which [Creative Commons](#) licence will apply to this Work are set out in our licence referred to above.

Other than as permitted in any relevant BMJ Author's Self Archiving Policies, I confirm this Work has not been accepted for publication elsewhere, is not being considered for publication elsewhere and does not duplicate material already published. I confirm all authors consent to publication of this Work and authorise the granting of this licence.

1  
2  
3 **Impact of the Nutri-Score front-of-pack nutrition label on purchasing intentions of**  
4 **individuals with chronic diseases: results of a randomized trial**  
5  
6  
7

8 Manon Egnell<sup>1</sup>, Isabelle Boutron<sup>2</sup>, Sandrine Péneau<sup>1</sup>, Pauline Ducrot<sup>3</sup>, Mathilde Touvier<sup>1</sup>, Pilar  
9 Galan<sup>1</sup>, Léopold K. Fezeu<sup>1</sup>, Raphaël Porcher<sup>2</sup>, Philippe Ravaud<sup>2</sup>, Serge Hercberg<sup>1,4</sup>,  
10 Emmanuelle Kesse-Guyot<sup>1</sup>, Chantal Julia<sup>1,4</sup>,  
11  
12  
13  
14  
15  
16

17 **Author's Affiliation:**  
18

19 <sup>1</sup> Sorbonne Paris Nord (Paris 13), CRESS, INSERM, INRAE, Cnam, Nutritional Epidemiology  
20 Research Team (EREN), F-93017 Bobigny, France  
21  
22

23 <sup>2</sup> Université de Paris, CRESS, INSERM, INRAE, F-75004 Paris, France  
24  
25

26 <sup>3</sup> Santé publique France, French national public health agency. F-94415 Saint-Maurice, France  
27  
28

29 <sup>4</sup> Public health department, Avicenne Hospital, AP-HP, Bobigny, France  
30  
31  
32

33 **Corresponding author contact information:** Pr Chantal Julia, EREN, Inserm U1153, SMBH  
34  
35

36 Paris 13, 74 rue Marcel Cachin, F-93017 Bobigny Cedex, France, c.julia @eren.smbh.univ-  
37 paris13.fr  
38  
39  
40  
41  
42

43 **Word count:** 3500 words  
44  
45  
46  
47  
48  
49  
50  
51  
52  
53  
54  
55  
56  
57  
58  
59  
60

1  
2  
3 21 **ABSTRACT**  
4

5 22 **Objective** : To our knowledge, the effect of front-of-pack nutrition labels such as the Nutri-  
6  
7 23 Score on food purchases has never been assessed among individuals suffering from nutrition-  
8  
9 24 related chronic diseases specifically, while dietary modifications are generally part of their care.  
10  
11 25 This study aimed to investigate the effect of the Nutri-Score on the nutritional quality of  
12  
13 26 purchasing intentions among adults suffering from a cardiometabolic disease, compared to no  
14  
15 27 label and the Reference Intakes (RIs), a label already implemented by some food manufacturers  
16  
17 28 in France.

18  
19  
20  
21 29 **Setting**: Secondary prevention – mainland France

22  
23  
24 30 **Participants** : 2,431 eligible participants were randomly assigned and 1,180 participants  
25  
26 31 (65.5% women, mean age 65.0±7.1 years) completed the shopping task and were included in  
27  
28 32 the analyses.

29  
30  
31 33 **Intervention**: A three-arm randomized controlled trial using an experimental online  
32  
33 34 supermarket was conducted in 2017. Participants with cardiometabolic diseases were invited to  
34  
35 35 simulate food purchases with the Nutri-Score, the RIs or no label.

36  
37 36 **Primary and secondary outcome measures** : The primary outcome was the nutritional quality  
38  
39 37 of the shopping cart, estimated using the French-modified Food Standard Agency Nutrient  
40  
41 38 Profiling System (FSAm-NPS), and secondary outcomes included the nutrient content of  
42  
43 39 purchases.

44  
45  
46 40 **Results**: The mean (SD) FSAm-NPS score was significantly lower in the Nutri-Score arm  
47  
48 41 (1.29(3.61) points), reflecting a higher overall nutritional quality of purchasing intentions,  
49  
50 42 compared to the RIs (1.86(3.23) points) and no label (1.92(2.90) points) arms (p-value=0.01).  
51  
52 43 Moreover, the Nutri-Score led to significantly lower content in calories and saturated fatty acids  
53  
54 44 compared to the two other arms. These differences resulted from participants avoiding some  
55  
56  
57  
58  
59  
60



1  
2  
3 45 packaged products (sweets, dairy and starches) and purchasing larger amounts of fresh fruit and  
4  
5 46 meat.

7 47 **Conclusions:** The Nutri-Score exhibited a significant higher nutritional quality of purchasing  
8  
9 48 intentions, encouraging healthier food choices among individuals suffering from  
10  
11 49 cardiometabolic chronic diseases.

12  
13  
14 50 **Trial registration :** NCT02769455  
15  
16

17 51  
18  
19 52 **Article summary**

20  
21 53 Strengths and limitations of this study

- 22  
23  
24 54 • Inclusion of a rarely explored population in a randomized controlled trial pertaining to  
25  
26 55 the effectiveness of front-of-package labelling on food choices  
27  
28 56 • This controlled experimental environment allowed assessing the effect of the Nutri-  
29  
30 57 Score in standardized conditions and optimizing internal validity of the study.  
31  
32 58 • Limitation pertaining to a high rate of participants who did not complete the shopping  
33  
34 59 task.  
35  
36 60 • The trial investigated purchasing intentions rather than actual food purchases.  
37  
38  
39  
40  
41

42 62 **Keywords:** Front-of-pack nutrition label; cardiometabolic diseases; Food purchases;  
43  
44 63 Nutritional quality; Experimental online supermarket  
45  
46  
47  
48  
49  
50  
51  
52  
53  
54  
55  
56  
57  
58  
59  
60

## 64 INTRODUCTION

65  
66 Non-Communicable Diseases (NCDs), such as obesity, type 2 diabetes, cardiovascular diseases  
67 and cancer have become a major burden for the current health systems.[1] For these diseases,  
68 dietary factors have been recognized to be one of the major leading risk factors in developed  
69 countries, resulting in 11 million deaths worldwide in 2017, and represent modifiable  
70 determinants through primary prevention.[2] In France, cardiovascular diseases remain the  
71 second leading cause of deaths by NCDs, accounting for 30% approximately of mortality.[3]  
72 Regarding obesity, the prevalence was estimated at 17% within the French adult population in  
73 2015,[4] and the prevalence of type 2 diabetes was around 5% in 2016.[5]

74  
75 Hence, in the context of secondary or tertiary prevention, many treatment guidelines highlight  
76 the importance to modify dietary habits to improve the nutritional status of individuals and thus  
77 control these nutrition-related NCDs.[1] For example, controlling for saturated fatty acids  
78 (SFA), sugars and salt intakes and increasing fruits and vegetables, pulses, and fibres  
79 consumption are encouraged in the management of several NCDs or risk factors such as obesity,  
80 arterial hypertension and diabetes.[1] Nutritional labelling has been suggested to be an  
81 interesting tool in helping individuals suffering from NCDs achieve balanced nutritional  
82 intakes.[6] However, it has been shown that nutritional information on the back of packages  
83 were poorly understood and used during food choices.[7] While few studies have suggested  
84 that individuals suffering from nutrition-related NCDs would pay more attention to nutritional  
85 information and check for specific nutrients,[8,9] another study has observed no difference of  
86 nutritional information use between patients and individuals with no chronic condition.[6]

87

1  
2  
3 88 In the last decade, Front-of-Pack nutrition Labels (FoPLs) have been identified to improve the  
4  
5 89 nutritional quality of food choices at the point-of-purchase in the general population,[10–19]  
6  
7  
8 90 and to encourage reformulation and innovation of food products.[20,21] In France, the  
9  
10 91 summary FoPL Nutri-Score has been adopted in October 2017 (and then in several European  
11  
12 92 countries) to indicate the nutritional quality of products in supermarkets.[22] By the end of  
13  
14 93 2019, the brands which adopted the Nutri-Score represented approximately 25% of the volume  
15  
16 94 of pre-packed foods sales with more than 300 manufacturers engaged.[23] The Nutri-Score has  
17  
18 95 been demonstrated to be well perceived, understood and to have a positive effect on food  
19  
20 96 purchases in the general French population[14,18,24–27] and students.[28] However, as the  
21  
22 97 measure is implemented on a voluntary basis, it coexists on the French market with the  
23  
24 98 Reference Intakes label (RIs),[29] used by multiple food manufacturers since 2006 in Europe,  
25  
26 99 and the absence of any front-of-pack labelling.  
27  
28  
29  
30

100

31  
32  
33 101 To our knowledge, no study has specifically investigated the effect of FoPLs, including the  
34  
35 102 Nutri-Score, on food purchasing intentions of patients suffering from nutrition-related NCDs  
36  
37 103 only. Thus, the study aimed to determine the effect of the Nutri-Score on purchasing intentions  
38  
39 104 of individuals suffering from nutrition-related cardiometabolic chronic diseases, compared to  
40  
41 105 the current French labelling situations, i.e. the RIs or no FoPL, as a secondary or primary  
42  
43 106 prevention tool.  
44  
45  
46

107

108

109

110

111

112

## 113 **METHODS**

114

### 115 **Trial design and participants**

116 A three-arm parallel group randomized trial was conducted in 2017 targeting individuals  
117 suffering from cardiometabolic NCDs. The study was approved by the Institutional Review  
118 Bard of the INSERM (IRB n°IRB0000388 FWA00005831), the National Commission for Data  
119 Protection and Liberties (CNIL n° 909216) and the *Comité consultatif sur le traitement de*  
120 *l'information en matière de recherche dans le domaine de la santé*, and registered at  
121 <https://clinicaltrials.gov/ct2/show/NCT02769455>. Electronic consent was obtained from each  
122 participant. A methodology similar to a trial targeting students was used.[28]

123

124 Participants were recruited from the NutriNet-Santé cohort by a targeted emailing campaign in  
125 2016, using the following criteria: age, BMI, and the declaration of one of the diseases included  
126 in the present study. Briefly, the NutriNet-Santé is an ongoing web-based prospective  
127 observational cohort study launched in France in May 2009, including adult volunteers  
128 recruited by multi-media campaigns.[30] Each individual who agreed to participate was asked  
129 to fulfil an inclusion questionnaire and provide information on gender, age, occupation,  
130 educational level, household composition, and weekly budget for grocery shopping. They were  
131 also asked to self-estimate their nutrition knowledge level on a 4-point scale (between “I am  
132 very knowledgeable about nutrition” and “I do not know anything about nutrition”), and to  
133 provide information on their grocery shopping frequency in general and online (“Always”,  
134 “Often”, “Sometimes” and “Never”). Finally, they were invited to declare if they had been  
135 diagnosed or were currently under medical supervision for at least one of the following  
136 nutrition-related chronic diseases: obesity, type 2 diabetes, dyslipidaemia, arterial hypertension,

1  
2  
3 137 cardiovascular disease. Thus, individuals involved in grocery shopping, over 50 years old, and  
4  
5 138 with at least one of the chronic diseases from the list above, were eligible to participate.  
6  
7  
8 139

### 10 140 **Patient and public involvement**

11  
12 141 The research question underlying the study was driven by considerations regarding tools to  
13  
14 142 improve patients' empowerment concerning their diets. Patients were not directly involved in  
15  
16 143 the development of the protocol or in recruitment of participants. Dissemination of the research  
17  
18 144 results will be done through the NutriNet-Santé cohort platform, with an abstract in the French  
19  
20 145 language, allowing for all participants to be informed.  
21  
22  
23  
24 146

### 26 147 **Randomization and blinding**

27  
28 148 Eligible participants were randomly allocated to one of the three arms using a random block  
29  
30 149 method with permuted blocks of size 3, 6, 9 and 12, without stratification. The randomization  
31  
32 150 list was only available to the independent statistician who generated the randomization  
33  
34 151 sequence and the computer programmer who uploaded the list on the secured platform. Given  
35  
36 152 the nature of the intervention, participants could not be blinded of the intervention; however,  
37  
38 153 they were only informed about the main objectives of the experimental online supermarket,  
39  
40 154 aiming to investigate determinants of purchasing behaviour. No information was given on the  
41  
42 155 FoPLs or the explicit purpose of the trial.  
43  
44  
45  
46  
47 156

### 49 157 **Intervention and procedure**

#### 51 158 **Experimental arm**

52  
53 159 The experimental arm consisted on the Nutri-Score applied on the front of package of all pre-  
54  
55 160 packed foods included in the online supermarket. The Nutri-Score is a summary FoPL  
56  
57 161 characterizing the overall nutritional quality of foods. The label is based on the Food Standards  
58  
59  
60

1  
2  
3 162 Agency Nutrient Profiling System, modified by the High Council of Public Health to better  
4  
5 163 discriminate foods from specific categories (cheese, fats and beverages) consistently with  
6  
7 164 nutritional recommendations (FSAm-NPS).[18] The FSAm-NPS is calculated for 100g (or  
8  
9 165 100mL) of food, and allocates from 0 to 10 points for each nutrient which should be limited  
10  
11 166 (energy (kJ), SFA (g), sugars (g), and sodium (mg)) and from 0 to 5 points to each favourable  
12  
13 167 nutrient which should be encouraged (proteins (g), fibres (g), and the content in fruits,  
14  
15 168 vegetables, legumes and nuts (%)). A discrete score is finally obtained by subtracting the  
16  
17 169 favourable points from the unfavourable points, ranging therefore between a minimum of -15,  
18  
19 170 for food products with higher nutritional quality, to a maximum of +40 points for food products  
20  
21 171 with lower nutritional quality. Hence, the lower the FSAm-NPS score, the healthier the  
22  
23 172 products. Then, the Nutri-Score is represented by a 5-colour scale with a corresponding letter,  
24  
25 173 from dark green (A) indicating the highest nutritional quality to dark orange (E) for products  
26  
27 174 with the lowest nutritional quality.  
28  
29  
30  
31  
32

### 33 175

#### 35 176 Control arms

36  
37 177 Two control arms were also included: (1) the RIs FoPL was affixed on all pre-packed food  
38  
39 178 items, and (2) no front-of-pack nutritional labelling at all. The RIs is a nutrient-specific  
40  
41 179 monochromatic label endorsed by some manufacturers, indicating the kilocalories and the  
42  
43 180 amount of fat, SFA, sugars and sodium in gram per serving, and their contribution in  
44  
45 181 percentages to the guideline-based daily intakes.[29] In the no label arm, no nutrition label was  
46  
47 182 applied on the front of food packages on the experimental online supermarket.  
48  
49  
50

51 183  
52  
53  
54 184 The experimental online supermarket was composed of three sections. First, the upper section  
55  
56 185 included the logo of the supermarket, a search bar, an access to the shopping cart, and the tabs  
57  
58 186 for the different food categories. Second, a central section displaying advertisements and  
59  
60

1  
2  
3 187 showing shoppers in a supermarket aisle was included. The rotating banner ad on the left side  
4  
5 188 of the central section included one specific ad and four ads on non-dietary information such as  
6  
7 189 information on national campaigns of health promotion. In the two arms with a FoPL, the  
8  
9 190 specific ad drew awareness on the label with additional information on its computation and use.  
10  
11 191 In the no label arm, additional information was provided on the proper conservation of fresh  
12  
13 192 food products. On the central section, the participant could also view the different products  
14  
15 193 depending on the food categories, and access the information (name, brand, price, nutritional  
16  
17 194 information, etc) by clicking on the product. For the two label arms, the nutritional label was  
18  
19 195 affixed on the front of the package and next to the product on a larger scale to improve its  
20  
21 196 readability. Third, the lower section included links to the various food categories, links for  
22  
23 197 information and links towards account information. An example of a food item included in the  
24  
25 198 experimental online supermarket with its three versions depending on the trial arm is shown in  
26  
27 199 Figure 1 and a picture of the experimental online supermarket is presented in Figure S1 [28].  
28  
29  
30  
31  
32

200

## 201 Procedure

202 For this specific purpose, an experimental online supermarket was developed, similar to  
203 previous trials.[18,28] Eligible participants were invited to simulate a shopping task as if they  
204 were in their usual supermarket, but without any payment required and no instruction on the  
205 amount, the duration or the number of participants they were asked to shop for. The  
206 experimental online supermarket resembled existing grocery shopping websites with a virtual  
207 shopping cart, a virtual payment procedure, a search tab and promotional banners. As in real  
208 shopping websites, participants could choose products categorized in multiple food groups and  
209 subgroups, using a hierarchical structure and names of the categories similar to existing online  
210 supermarkets. The food offer was a representative sample of the products commonly sold on  
211 French online supermarkets and included 751 foods and beverages (pre-packed products

1  
2  
3 212 carrying a FoPL on the Nutri-Score and RIs arms, and raw products without any label in the  
4  
5 213 three arms according to the European regulation), divided into twenty food categories. For all  
6  
7 214 products, name, brand, price (per unit and per kg or litter), a picture of the product (with or  
8  
9 215 without a FoPL, depending on the arm) and the nutritional composition as well as the list of  
10  
11 216 ingredients were provided. For each food item, at least two different products were proposed,  
12  
13 217 including a national brand and a retailer's brand. The number of brands proposed balanced the  
14  
15 218 nutritional variability observed for a given type of food.

### 19 219 **Outcomes**

20  
21 220 The primary outcome was the overall nutritional quality of the shopping cart, assessed by the  
22  
23 221 mean of the FSAm-NPS score across all the items in the cart, computed for 100g. A lower  
24  
25 222 overall FSAm-NPS score of the shopping cart reflects a higher nutritional quality of the entire  
26  
27 223 selection of products within the cart. Minimal theoretical value is -15, maximal theoretical value  
28  
29 224 is +40.

30  
31 225 Secondary outcomes were, by order of importance, the content of the shopping cart in energy,  
32  
33 226 SFA, sugars, sodium, fibres, fruits and vegetables, and proteins, for 100g of the shopping cart.

34  
35  
36  
37 227

### 38 228 **Statistical analyses**

39  
40  
41 229 The final sample size was calculated for an effect size of 0.2 (for the main outcome, FSAm-  
42  
43 230 NPS score, calculated by minimization of estimates from previous studies showing a 0.62 point  
44  
45 231 difference between Nutri-Score and control arm, with an SD of 2.55 of the average FSAm-NPS  
46  
47 232 of the shopping cart [26]), a power of 90% and a p-value of 0.02 considering the three-arm  
48  
49 233 design, resulting in 1,956 individuals, i.e. 652 participants per arm. To reach this final sample  
50  
51 234 size while considering non-respondents, 2,431 individuals were initially randomized and the  
52  
53 235 number of individuals validating their shopping cart was monitored.

54  
55  
56  
57  
58 236  
59  
60



1  
2  
3 237 Per protocol analyses were carried out, given that only one measure was collected for the  
4  
5 238 outcome. All participants meeting the inclusion criteria and who completed the shopping task  
6  
7  
8 239 were included in the analyses. The primary outcome was compared between the three trial arms  
9  
10 240 using one-way ANOVA ( $p\text{-value}\leq 0.05$  significant). Pairwise comparisons among FoPLs were  
11  
12 241 performed using Tukey tests to consider multiple comparisons ( $p\text{-value}\leq 0.05$  significant).  
13  
14 242 Then, secondary outcome variables were also compared between the three arms using a  
15  
16 243 hierarchical gatekeeping strategy[28] with the following order: 1. Energy, 2. SFA, 3. Sugars, 4.  
17  
18 244 Sodium, 5. Fibres, 6. Fruits and vegetables, 7. Proteins. When the comparison across the three  
19  
20 245 arms for a component was not significant, the comparison of following secondary outcomes  
21  
22 246 was stopped. The gatekeeping strategy order was determined using the relative importance of  
23  
24 247 the various nutrients to health (with the most unfavourable elements first) and the results of  
25  
26 248 previous studies assessing FoPL effects on the nutritional quality of food purchases.[18]  
27  
28 249 Analyses were performed considering the FSAm-NPS score of all products from the  
29  
30 250 experimental supermarket, including also raw items that were not labelled in any trial arm (i.e.  
31  
32 251 fruits, vegetables, meat and poultry). Multiple sensitivity analyses were then performed. First,  
33  
34 252 sensitivity analyses were computed (1) including only labelled food products (i.e. pre-packed  
35  
36 253 foods and beverages), (2) excluding participants whose spending amount was below the 5<sup>th</sup>  
37  
38 254 percentile or over the 95<sup>th</sup> percentile of the distribution of the cost of the shopping carts in the  
39  
40 255 sample, and (3) using multiple imputations on missing outcomes (25 imputed sets) to consider  
41  
42 256 the non-response rate and thus provide intention-to-treat estimates. Missing primary and  
43  
44 257 secondary outcomes of non-respondents were imputed using the individual characteristics of  
45  
46 258 the individuals, including sociodemographic and nutrition-related lifestyle data collected in the  
47  
48 259 inclusion questionnaire. The total quantities of calories, SFA, sugars, sodium, fibres, and  
49  
50 260 proteins in the shopping carts were also calculated and compared across the three arms using  
51  
52 261 ANOVA. The composition of the shopping cart across the different food categories was  
53  
54  
55  
56  
57  
58  
59  
60

1  
2  
3 262 calculated in percentage of the total number of products in the cart (mean and standard error).  
4  
5 263 The contributions of each food group to the nutrient amounts in the shopping carts were then  
6  
7 264 calculated and expressed a mean percentage and standard error. Finally, the distribution of the  
8  
9  
10 265 products across the different Nutri-Score classes was also compared between the three arms,  
11  
12 266 taking into account all food products including raw foods that were non-labelled.  
13

14 267  
15  
16  
17 268 All tests of significance were two-sided, and analyses were carried out with the SAS software  
18  
19 269 (version 9.4; SAS Institute, Inc.).  
20

21 270  
22

23 271  
24

## 25 272 **RESULTS**

26 273  
27

28  
29  
30 274 Among 3,728 individuals with chronic diseases assessed for eligibility, 1,297 did not meet  
31  
32 275 inclusion criteria, resulting in 2,431 participants randomly assigned to one of the three arms  
33  
34 276 (Figure 2). Among them, 1,180 individuals with a nutrition-related chronic disease fully  
35  
36 277 completed the shopping task and were finally included in the analyses. The other subjects who  
37  
38 278 did not complete their shopping cart were excluded from the analyses, as their purchasing  
39  
40 279 behaviour may not be representative of their habits. Overall, participants of the trial included  
41  
42 280 65.5% of women, 27.8% of subjects with primary educational level, and their mean age was  
43  
44 281 65.0±7.1 years (Table 1). Regarding purchasing behaviour, 61.2% declared doing always their  
45  
46 282 grocery shopping and 29.7% reported having purchased foods online at least once. Among  
47  
48 283 them, 16.2% reported purchasing online at least one time per week. 57.2% of the included  
49  
50 284 participants declared having an intermediate self-estimated nutrition knowledge level, and  
51  
52 285 51.4% often reading the nutrition facts. The two main chronic diseases represented in the trial  
53  
54 286 were arterial hypertension (65.7%) and dyslipidaemia (33.9%), then followed by cardiovascular  
55  
56  
57  
58  
59  
60

1  
2  
3 287 diseases (15.2%), type 2 diabetes (14.7%), and obesity (13.8%). Approximately 30% of  
4  
5 288 participants reported having more than one of the diseases included in the trial. Individual  
6  
7 289 characteristics of participants were globally similar between the three arms. The mean cost of  
8  
9 the shopping cart was 75.0±51.5 euros overall, 80.0±57.8 euros in the Nutri-Score arm,  
10 290  
11 73.9±48.3 euros in the RIs arm and 71.2±47.3 euros in the no label arm. The mean weight of  
12 291  
13 the shopping carts was 16.6±14.3 kg in the Nutri-Score arm with 22.9±21.9 products on  
14 292  
15 average, 24.2±14.7 kg in the Reference Intakes arm with 33.6±22.0 products on average, and  
16 293  
17 22.7±14.2 kg in the no label arm with 31.1±21.3 products on average.  
18 294  
19  
20  
21 295

22  
23 296 According to the flow diagram, approximately 50% of participants did not complete the virtual  
24 297 shopping task. Individual characteristics between respondents and non-respondents were  
25  
26 298 compared for intention-to-treat analyses and results are displayed in Table S1. Even if non-  
27  
28 299 respondents had some small disparities on their sociodemographic and lifestyle characteristics  
29  
30 compared to respondents, this potential bias was similar in the three arms. Indeed, the  
31 300  
32 interaction term between each individual characteristic and the arm to model the probability of  
33 301  
34 no response was not statistically significant (p-value≥0.1).  
35 302  
36  
37  
38  
39  
40 303  
41  
42 304  
43  
44 305  
45  
46 306  
47  
48 307  
49  
50 308  
51  
52 309  
53  
54 310  
55  
56 311  
57  
58  
59  
60

312

**Table 1** Individual characteristics of included participants, NutriNet-Santé cohort (n=1,180)

|                                                     | Nutri-Score | Reference Intakes | No label    | Total       |
|-----------------------------------------------------|-------------|-------------------|-------------|-------------|
| <b>Total (n)</b>                                    | 394         | 392               | 394         | 1180        |
| <b>Gender, n(%)</b>                                 |             |                   |             |             |
| Men                                                 | 131 (33.3)  | 124 (31.6)        | 152 (38.6)  | 407 (34.5)  |
| Women                                               | 263 (66.7)  | 268 (68.4)        | 242 (61.4)  | 773 (65.5)  |
| <b>Age, years</b>                                   | 64.8 ± 6.9  | 64.8 ± 7.3        | 65.4 ± 7.1  | 65.0 ± 7.1  |
| <b>Educational level, n(%)</b>                      |             |                   |             |             |
| Primary                                             | 122 (31.0)  | 102 (26.0)        | 104 (26.4)  | 328 (27.8)  |
| Secondary                                           | 53 (13.4)   | 51 (13.0)         | 74 (18.8)   | 178 (15.1)  |
| University, undergraduate degree                    | 103 (26.1)  | 122 (31.2)        | 99 (25.1)   | 324 (27.4)  |
| University, postgraduate degree                     | 98 (24.9)   | 102 (26.0)        | 103 (26.1)  | 303 (25.7)  |
| Other                                               | 18 (4.6)    | 15 (3.8)          | 14 (3.6)    | 47 (4.0)    |
| <b>Grocery shopping frequency, n(%)</b>             |             |                   |             |             |
| Always                                              | 231 (58.63) | 252 (64.3)        | 239 (60.6)  | 722 (61.2)  |
| Often                                               | 122 (30.96) | 107 (27.3)        | 113 (28.7)  | 342 (29.0)  |
| Sometimes                                           | 41 (10.41)  | 33 (8.4)          | 42 (10.7)   | 116 (9.8)   |
| <b>Online grocery shopping, yes n(%)</b>            | 119 (30.2)  | 129 (32.9)        | 103 (26.1)  | 351 (29.7)  |
| <b>Online grocery shopping frequency, n(%)</b>      |             |                   |             |             |
| At least one time per week                          | 16 (13.4)   | 20 (15.5)         | 21 (20.4)   | 57 (16.2)   |
| One or two times per month                          | 22 (18.5)   | 26 (20.1)         | 15 (14.5)   | 63 (18.0)   |
| One time every two or three months                  | 29 (24.4)   | 33 (25.6)         | 17 (16.5)   | 79 (22.5)   |
| One or two times per year                           | 23 (19.3)   | 21 (16.3)         | 29 (28.2)   | 73 (20.8)   |
| Less than one time per year                         | 29 (24.4)   | 29 (22.5)         | 21 (20.4)   | 79 (22.5)   |
| <b>Weekly budget for grocery shopping (€), n(%)</b> |             |                   |             |             |
| < 30€                                               | 13 (3.3)    | 17 (4.3)          | 16 (4.1)    | 46 (3.9)    |
| 30 – 50€                                            | 76 (19.3)   | 74 (18.9)         | 63 (16.0)   | 213 (18.0)  |
| 50 – 100€                                           | 151 (38.3)  | 168 (42.9)        | 160 (40.6)  | 479 (40.6)  |
| > 100€                                              | 151 (38.3)  | 130 (33.1)        | 147 (37.3)  | 428 (36.3)  |
| Missing                                             | 3 (0.8)     | 3 (0.8)           | 8 (2.0)     | 14 (1.2)    |
| <b>Perceived nutritional knowledge, n(%)</b>        |             |                   |             |             |
| High                                                | 38 (9.6)    | 38 (9.7)          | 22 (5.6)    | 98 (8.3)    |
| Intermediate                                        | 222 (56.4)  | 220 (56.1)        | 233 (59.1)  | 675 (57.2)  |
| Low                                                 | 125 (31.7)  | 125 (31.9)        | 124 (31.5)  | 374 (31.7)  |
| No                                                  | 9 (2.3)     | 7 (1.8)           | 9 (2.3)     | 25 (2.1)    |
| Missing data                                        | 0           | 2 (0.5)           | 6 (1.5)     | 8 (0.7)     |
| <b>Nutrition facts reading frequency, n(%)</b>      |             |                   |             |             |
| Always                                              | 63 (16.0)   | 55 (14.0)         | 54 (13.7)   | 172 (14.6)  |
| Often                                               | 202 (51.3)  | 199 (50.8)        | 206 (52.3)  | 607 (51.4)  |
| Sometimes                                           | 117 (29.7)  | 122 (31.1)        | 119 (30.2)  | 358 (30.3)  |
| Never                                               | 12 (3.0)    | 14 (3.6)          | 9 (2.3)     | 35 (3.0)    |
| Missing data                                        | 0           | 2 (0.5)           | 6 (1.5)     | 8 (0.7)     |
| <b>Chronic disease diagnosed, n(%)</b>              |             |                   |             |             |
| Arterial hypertension                               | 265 (67.3)  | 256 (65.3)        | 254 (64.5)  | 775 (65.7)  |
| Diabetes mellitus                                   | 51 (12.9)   | 55 (14.0)         | 67 (17.0)   | 173 (14.7)  |
| Cardiovascular disease                              | 65 (16.5)   | 48 (12.2)         | 66 (16.8)   | 179 (15.2)  |
| Dyslipidemia                                        | 141 (35.8)  | 127 (32.4)        | 132 (33.5)  | 400 (33.9)  |
| Obesity                                             | 43 (10.9)   | 58 (14.8)         | 62 (15.7)   | 163 (13.8)  |
| Total cost of the shopping cart (€)                 | 80.0 ± 57.8 | 73.9 ± 48.3       | 71.2 ± 47.3 | 75.0 ± 51.5 |

|   |                                         |             |             |             |             |
|---|-----------------------------------------|-------------|-------------|-------------|-------------|
| 1 |                                         |             |             |             |             |
| 2 |                                         |             |             |             |             |
| 3 | Number of products in the shopping cart | 22.9 ± 21.9 | 33.6 ± 22.0 | 31.1 ± 21.3 | 29.2 ± 22.2 |
| 4 | Weight of the shopping cart (kg)        | 16.6 ± 14.3 | 24.2 ± 14.7 | 22.7 ± 14.2 | 21.2 ± 14.8 |

5 Values are mean ± standard deviation or n (%) as appropriate.

6  
7  
8  
9  
10  
11  
12  
13  
14  
15  
16  
17  
18  
19  
20  
21  
22  
23  
24  
25  
26  
27  
28  
29  
30  
31  
32  
33  
34  
35  
36  
37  
38  
39  
40  
41  
42  
43  
44  
45  
46  
47  
48  
49  
50  
51  
52  
53  
54  
55  
56  
57  
58  
59  
60

For peer review only

1  
2  
3 313 **Outcomes**  
4

5 314 The FSAm-NPS score was lower in the Nutri-Score arm ( $1.29 \pm 3.61$  points), reflecting a higher  
6  
7 overall nutritional quality of the shopping carts, followed by the RIs arm ( $1.86 \pm 3.23$  points)  
8 315  
9 and no label ( $1.92 \pm 2.9$  points) (Table 2). The difference of FSAm-NPS scores were statistically  
10 316  
11 significant between the Nutri-Score and the RIs groups (mean difference= $-0.57[-1.11;-0.02]$ ;  
12 317  
13 p-value= $0.04$ ), and between the Nutri-Score and no label ( $-0.63[-1.17;-0.08]$ ; p-value= $0.02$ ).  
14 318  
15 No significant difference was observed between the RIs and no label ( $-0.06[-0.61;0.48]$ ; p-  
16 319  
17 value= $1.0$ ). Furthermore, the Nutri-Score label led to a significantly lower content of the  
18 320  
19 shopping carts in calories and SFA, compared to the RIs and no label (p-values $\leq 0.0001$  for  
20 321  
21 comparisons of calories between the Nutri-Score and both RIs and no label; p-values= $0.01$  for  
22 322  
23 comparisons of SFA between the Nutri-Score and both RIs and no label). The differences  
24 323  
25 between the RIs and no label arms were not significant. The differences of sugars content  
26 324  
27 between the three arms were not significant; then comparisons of subsequent secondary  
28 325  
29 outcomes were stopped.  
30 326  
31  
32  
33  
34  
35  
36  
37  
38  
39  
40  
41  
42  
43  
44  
45  
46  
47  
48  
49  
50  
51  
52  
53  
54  
55  
56  
57  
58  
59  
60

**Table 2** Overall nutritional quality, energy and nutrient content for 100g of the shopping cart

|                                                   | Nutri-Score    | Reference Intakes | No label       | P-value           | Nutri-Score vs no label |                   | Nutri-Score vs Reference Intakes |                   | Reference Intakes vs no label |                |
|---------------------------------------------------|----------------|-------------------|----------------|-------------------|-------------------------|-------------------|----------------------------------|-------------------|-------------------------------|----------------|
|                                                   | n=394          | n=392             | n=394          |                   | Difference <sup>a</sup> | P <sup>b</sup>    | Difference <sup>a</sup>          | P <sup>b</sup>    | Difference <sup>a</sup>       | P <sup>b</sup> |
| Overall nutritional quality (FSAm-NPS score/100g) | 1.29 ±3.61     | 1.86 ± 3.23       | 1.92 ±2.9      | <b>0.01</b>       | -0.63 (-1.17;-0.08)     | <b>0.02</b>       | -0.57 (-1.11;-0.02)              | <b>0.04</b>       | -0.06 (-0.61;0.48)            | 1.0            |
| Calories (kcal/100g)                              | 153.53 ±76.96  | 184.06 ±64.38     | 175.38 ±64.22  | <b>&lt;0.0001</b> | -21.85 (-33.35;-10.35)  | <b>&lt;0.0001</b> | -30.53 (-42.05;-19.02)           | <b>&lt;0.0001</b> | 8.68 (-2.83;20.20)            | 0.2            |
| Saturated fatty acids (g/100g)                    | 3.24 ±3.13     | 3.78 ±2.13        | 3.77 ±2.36     | <b>0.004</b>      | -0.53 (-0.96;-0.10)     | <b>0.01</b>       | -0.53 (-0.96;-0.10)              | <b>0.01</b>       | 0.01 (-0.42;0.44)             | 1.0            |
| Sugars (g/100g)                                   | 5.92 ±3.58     | 5.89 ±3.25        | 5.65 ±3.81     | 0.5               | 0.27 (-0.32;0.87)       | 0.5               | 0.03 (-0.56;0.63)                | 1.0               | 0.24 (-0.35;0.84)             | 0.6            |
| Sodium (mg/100g)                                  | 189.83 ±200.21 | 195.51 ±104.13    | 212.73 ±158.16 |                   |                         |                   |                                  |                   |                               |                |
| Fibers (g/100g)                                   | 1.37 ± 0.99    | 1.89 ±1.17        | 1.65 ±0.97     |                   |                         |                   |                                  |                   |                               |                |
| Fruits and vegetables (%)                         | 34.12 ± 22.87  | 29.51 ±16.03      | 28.90 ±14.81   |                   |                         |                   |                                  |                   |                               |                |
| Proteins (g/100g)                                 | 7.36 ± 3.43    | 7.29 ±2.20        | 7.58 ±3.33     |                   |                         |                   |                                  |                   |                               |                |

<sup>a</sup> Mean difference (95% Confidence Interval)<sup>b</sup> P-value using Tukey's multiple comparisons tests. Boldface indicates statistical significance (p-value≤0.05). FSAm-NPS: modified Food Standards Agency Nutrient Profiling System.

1  
2  
3 328 When analyses considered pre-packed products only, the overall difference of shopping carts'  
4  
5 329 FSAm-NPS score between the three arms was no longer significant suggesting inter-food group  
6  
7 330 substitutions (Table S2). However, results for the secondary outcomes remained consistent with  
8  
9 331 the main analyses. In sensitivity analyses excluding outliers on the spending amount, similar  
10  
11 332 results were observed for primary and secondary outcomes (Table S3). Results of the sensitivity  
12  
13 333 analyses using multiple imputations and providing intention-to-treat estimates are presented in  
14  
15 334 Table S4 for analyses considering all food products and Table S5 for analyses considering only  
16  
17 335 labelled food items. Results using multiple imputations were consistent with the main analyses;  
18  
19 336 however, the amplitude of differences between arms was lower and comparisons were no longer  
20  
21 337 significant, except for calories for which the Nutri-Score also led to lower contents compared  
22  
23 338 to the two other arms (Tables S4 and S5). The participants in the Nutri-Score arm purchased less  
24  
25 339 calories, SFA, sugars, sodium, fibres, and proteins compared to the two other arms (Table S6).  
26  
27 340  
28  
29 341 Table S7 describes the shopping carts composition in terms of the mean number of products  
30  
31 342 per food category in each of the three arms. In the Nutri-Score arm, participants tended to  
32  
33 343 purchase more products from the fruits (especially fresh fruit), meat and water categories  
34  
35 344 (compared to the RIs), and fewer products from vegetables, dairy products, cheeses, sweets and  
36  
37 345 starchy foods such as pasta, rice, rush potatoes and semolina. The average percentages of raw  
38  
39 346 products (i.e. not labelled in the label arms) purchased by participants were 32.9%±18.4% in  
40  
41 347 the no label arm, 33.2%±18.2% in the RIs arm, and 42.0%±28.1% in the Nutri-Score arm. The  
42  
43 348 percentage contributions of food groups to nutrient intakes in the overall shopping carts are  
44  
45 349 presented in Table S8 (only for nutrients where a difference between arm was observed in the  
46  
47 350 main analyses). Thus, the lower calorie and SFA contents of the shopping carts in the Nutri-  
48  
49 351 Score arm compared to the RIs arms could be explained by fewer products purchased in the  
50  
51 352 dairy products, cheese, but also sweets and starchy foods. Finally, the proportion of healthier  
52  
53  
54  
55  
56  
57  
58  
59  
60



1  
2  
3 353 food products in the shopping carts classified as A was significantly higher in the Nutri-Score  
4  
5 354 arm compared to the two other arms (difference = 5.63 [2.02;9.24], p-value=0.0008 compared  
6  
7 355 to no label; difference = 4.85 [1.24;8.47], p-value=0.005 compared to the RIs), which can be  
8  
9 356 partly explained by the higher proportion of raw fruits and meats in the shopping carts of  
10  
11 357 participants from the Nutri-Score group – corresponding to products with higher nutritional  
12  
13 358 quality (Table S9). On the contrary, the proportion of unhealthier products classified as D or E  
14  
15 359 was significantly lower in the Nutri-Score arm compared to the two other arms or the RIs only.  
16  
17 360 No significant difference was observed between the RIs and no label.  
18  
19 361  
20  
21 362  
22  
23  
24  
25

## 26 363 **DISCUSSION**

27  
28 364  
29  
30 365 Results of the present study showed that the Nutri-Score label significantly led to an  
31  
32 366 improvement of the overall nutritional quality of food purchasing intentions in individuals with  
33  
34 367 cardiometabolic chronic disease. Moreover, the Nutri-Score led to lower contents of the  
35  
36 368 shopping carts in energy and SFA compared to the two other arms. Similar trends were observed  
37  
38 369 with multiple imputations; nevertheless, differences were no longer statistically significant. No  
39  
40 370 significant difference was observed between the RIs and no label. Moreover, in both FoPLs  
41  
42 371 arms, and particularly in the Nutri-Score arm, substitutions between food groups were observed,  
43  
44 372 with more raw products purchased – corresponding mainly to fruits and butcher's meats from  
45  
46 373 higher nutritional quality. It appeared that the participants exposed to the Nutri-Score purchased  
47  
48 374 less products and from higher overall nutritional quality (i.e. lower FSAm-NPS score).  
49  
50  
51  
52  
53  
54  
55

56 376 The present findings are consistent with studies which observed a positive effect of interpretive  
57  
58 377 FoPLs and especially the Nutri-Score on the nutritional quality of intentional or real food  
59  
60

1  
2  
3 378 purchases, while the RIs demonstrated a limited or non-significant effect in the general  
4  
5 379 population [14,18] or students.[28] This could be partly explained by the features of the  
6  
7 380 schemes. Indeed, the summary indicator of the Nutri-Score, combining colours and text, would  
8  
9 381 be easier to read and understand.[16,18,19,31–37] On the contrary, the RIs with its nutrient-  
10  
11 382 specific and monochromatic format, has been shown to be more complicated to identify and  
12  
13 383 understand in the general population,[18,36,37] creating notably potential decisional conflicts  
14  
15 384 and prioritization of nutrients.[38] Nevertheless, to our knowledge, this is the first study to  
16  
17 385 assess the effect of FoPLs on purchasing intentions among individuals suffering from nutrition-  
18  
19 386 related NCDs. Only one study investigated the effect of the Traffic Lights nutrient-specific label  
20  
21 387 and the three-stars summary label on food purchases in vending machine among patients in an  
22  
23 388 Australian hospital and observed a positive effect of the labels to identify healthier products.  
24  
25 389 However, the experiment was performed in a specific context and no focus was made on  
26  
27 390 patients suffering specifically from nutrition-related NCDs.[12]  
28  
29  
30  
31  
32

33 391  
34  
35 392 Interestingly, while previous studies among patients with hypertension, hypercholesterolemia,  
36  
37 393 type 2 diabetes or hyperlipidaemia found that they were more likely to read information on salt  
38  
39 394 and SFA respectively,[39] and have lower intakes in energy and SFA,[9] in the present study,  
40  
41 395 the RIs did not help consumers to select products with significantly less SFA compared to no  
42  
43 396 label. On the contrary, the Nutri-Score which does not provide numerical data but rather  
44  
45 397 summarized information, led to significantly lower contents of the shopping carts in SFA  
46  
47 398 compared to no label and the RIs. These results on the Nutri-Score effect are particularly  
48  
49 399 important, given that a decrease of the intakes in energy, SFA and salt with an increase of fruits  
50  
51 400 and vegetables consumption are recommended among patients suffering from nutrition-related  
52  
53 401 NCDs.[1] Moreover, despite these recommendations, it has been observed in a study within the  
54  
55 402 NutriNet-Santé cohort that adults with a cardiometabolic disease tended to have unhealthier  
56  
57  
58  
59  
60

1  
2  
3 403 dietary habits overall (e.g. lower intakes of fruits, higher intakes of meat, processed meat and  
4  
5 404 added fats) compared to healthy controls,[40] which supports the interest of public health  
6  
7 405 measures encouraging healthier food choices among these individuals.  
8  
9

10 406

11  
12 407 When analyses were restricted to labelled items only, no significant difference of the overall  
13  
14 408 nutritional quality between the Nutri-Score and the other arms was found. These results reflect  
15  
16 409 that the use of the Nutri-Score may encourage also substitutions between food categories.  
17  
18 410 Indeed, participants who were exposed to the Nutri-Score tended to purchase more non-labelled  
19  
20 411 raw products, in particular fruits, meat and poultry, characterized by healthier nutritional  
21  
22 412 quality. This substitution between food categories has been observed in other populations under  
23  
24 413 the same or similar experimental conditions [28,41,42]. Some hypotheses could explain these  
25  
26 414 results. In general, the impact of front-of-pack labelling has been found to vary according the  
27  
28 415 food category [43], partly in relation to consumer motivation [44]. More specifically, the Nutri-  
29  
30 416 Score provides an explicit comparative scale of the nutritional quality of pre-packed foods and  
31  
32 417 may have raised awareness as to the lower nutritional value of some pre-packed products. By  
33  
34 418 comparison, this may have heightened the perceived healthiness fruit or meat products, even in  
35  
36 419 the absence of any labelling. As to beverages, water being the only beverage receiving a 'A'  
37  
38 420 Nutri-Score, its promotion is particularly straightforward in the system. Another hypothesis  
39  
40 421 relates to the overall awareness to the importance of food choices that the presence of the Nutri-  
41  
42 422 Score may have spurred, acting as a global reminder of previously received nutritional  
43  
44 423 education in patients. In doing so, the Nutri-Score scheme may cue concerns/motivations about  
45  
46 424 eating healthier products overall[45]. Finally, the choice to purchase more fresh fruits, meats,  
47  
48 425 and water (perceived as A-grade products) may also suggest compensatory behaviours designed  
49  
50 426 to offset choosing some less healthy products. It may also be worth noting that in choosing  
51  
52 427 more fresh fruits, meats, and water, (rather than increasing the purchase of vegetables),  
53  
54  
55  
56  
57  
58  
59  
60

1  
2  
3 428 consumers may also seek to balance the perceived healthiness of their choices with perceived  
4  
5 429 taste/palatability. These speculations as to the motivations and goals underlying specific food  
6  
7  
8 430 choices patterns following the introduction of a front-of-pack labelling scheme should be  
9  
10 431 further explored in future studies, to devise efficient strategies to reinforce the observed trends.  
11

12 432

13  
14 433 The present study provides insights regarding the effect of the Nutri-Score on purchasing  
15  
16 434 intentions of individuals with nutrition-related NCDs compared to the current labelling situation  
17  
18  
19 435 in France and other European countries. First, strength of the study pertained in the inclusion  
20  
21 436 of a specific population rarely explored in the nutritional labelling field, and its randomized  
22  
23  
24 437 controlled design, which resulted in comparable groups allowing accurate estimations of the  
25  
26 438 labels' effect. Furthermore, the experiment was conducted on an experimental online  
27  
28  
29 439 supermarket, closed to real online grocery shopping conditions, with a range of different  
30  
31 440 products with distinct nutritional profiles, brands and the use of real packaging. This controlled  
32  
33 441 experimental environment allowed assessing the effect of the Nutri-Score in standardized  
34  
35 442 conditions and optimizing internal validity of the study. Finally, we provided intention-to-treat  
36  
37  
38 443 analyses of the participants (Table S1) and intention-to-treat estimates through multiple  
39  
40 444 imputation methods. Nevertheless, some limitations should be acknowledged. First, a high rate  
41  
42 445 of participants did not complete the shopping task. Hence, respondents may have different  
43  
44  
45 446 individual characteristics, leading however to a potential non-differential bias which could limit  
46  
47 447 the generalizability of the results. In addition, the reduced sample size could have led to a  
48  
49 448 decreased statistical power preventing us from detecting some potential small differences.  
50  
51 449 Moreover, it is important to notice that analyses with multiple imputations led to similar trends  
52  
53  
54 450 but with non-significant differences given the wide variance in the sample. Second, the trial  
55  
56 451 involved voluntary participants, who may have greater interest and knowledge in nutrition than  
57  
58 452 the French population of patients. Thus, participants in the no label arm might have made  
59  
60

1  
2  
3 453 healthier food choices than the general population and the effects of FoPLs in comparison could  
4  
5 454 have been underestimated. Third, despite the diversity of the food offer proposed, the number  
6  
7 455 of products was somewhat limited, and some participants may not have found their usual  
8  
9 456 product and chose foods they would not buy in real shopping situation. In addition, the  
10  
11 457 representativity of the experimental food offer was not carefully assessed. These elements  
12  
13 458 would limit the extern validity of the study and the generalisability of the results to a real online  
14  
15 459 supermarket. Moreover, compared to the French average, the higher proportion of subjects who  
16  
17 460 declared doing often their grocery shopping online, may have led to a sample with  
18  
19 461 sociodemographic differences compared to the French population of patients. Fourth, the trial  
20  
21 462 investigated purchasing intentions rather than actual food purchases that may have led the  
22  
23 463 participants to take the experiment less seriously or to spend more money than they would  
24  
25 464 actually do. Complementary studies should be conducted in real-life settings to provide  
26  
27 465 additional elements on the Nutri-Score effectiveness. Nevertheless, virtual purchasing  
28  
29 466 behaviours of individuals have been suggested to be good predictors of real behaviours.[46]  
30  
31 467 Finally, the study included cases of self-reported cardiometabolic chronic conditions with no  
32  
33 468 validation required. Therefore, we were not able to ascertain whether the participants were  
34  
35 469 following specific diets or nutritional recommendations during the period of the trial, which  
36  
37 470 could have modified their purchasing behaviours. The present study focused on the Nutri-Score  
38  
39 471 effect as a secondary or tertiary prevention tool of NCDs, and complement previous studies  
40  
41 472 which have been conducted on the general population including individual without any chronic  
42  
43 473 conditions, or on specific subgroups such as students. Furthermore, it could have been  
44  
45 474 interesting to also include individuals having someone in the household with a chronic  
46  
47 475 condition.  
48  
49  
50  
51  
52  
53  
54  
55  
56 476  
57  
58  
59  
60

1  
2  
3 477 These results support that the Nutri-Score may improve the nutritional quality of food choices  
4  
5 478 of consumers suffering from nutrition-related chronic diseases. This is particularly important  
6  
7 479 given that an improvement of the dietary habits and the nutritional status of these individuals is  
8  
9 480 a major element in the secondary prevention and the management of these non-communicable  
10  
11 481 diseases. These findings are complementary to studies having observed a favourable effect of  
12  
13 482 the Nutri-Score or its underlying nutrient profiling system on chronic diseases risk, in a context  
14  
15 483 of primary prevention, through an improvement of food purchases and nutrient intakes.[18,47]  
16  
17  
18  
19  
20  
21  
22  
23  
24  
25  
26  
27  
28  
29  
30  
31  
32  
33  
34  
35  
36  
37  
38  
39  
40  
41  
42  
43  
44  
45  
46  
47  
48  
49  
50  
51  
52  
53  
54  
55  
56  
57  
58  
59  
60

## 484 **Acknowledgments**

485 The authors would like to thank especially Younes Essedik (IT manager), Nathalie Pecollo  
486 (operational coordinator) for the design of the experimental supermarket, Paul Flanzky  
487 (computer technician) for computer management, Julien Allègre (data manager) for data  
488 extraction and datamanagement, Flora Demory, Apolline Caroux, Wassila Ait Haddad, Amaia  
489 Cherbero, Aurélie Gayon for their contribution in the implementation of the experimental  
490 supermarket, and University deans for their contribution and involvement in the recruitment of  
491 participants.

## 493 **Competing interests**

494 All authors declare no competing interests.

## 496 **Author contributorship**

497 ME, CJ and IB wrote the statistical analysis plan, analysed the data, and drafted and revised the  
498 paper. SP, PD, MT, PG, LF, RP, PR, SH and EKG analysed the data and critically revised the  
499 paper for important intellectual content. SH and CJ designed data collection tools, implemented  
500 the study, monitored data collection for the whole study, and critically revised the draft paper  
501 for important intellectual content. All authors, external and internal, had full access to all of the  
502 data (including statistical reports and tables) in the study and can take responsibility for the  
503 integrity of the data and the accuracy of the data analysis. All authors have read and approved  
504 the final manuscript.

## 506 **Funding**

507 This project was funded by the French National Cancer Institute (INCA DA 2015-106). The  
508 NutriNet-Santé study was supported by the following public institutions: French Ministry of  
509 Health and Social Affairs, Santé Publique France, Institut National de la Santé et de la

1  
2  
3 510 Recherche Médicale (INSERM), Institut National de la Recherche Agronomique (INRA),  
4  
5 511 Conservatoire National des Arts et Métiers (CNAM) and Université Paris 13. The funders had  
6  
7  
8 512 no role in the design, implementation, analysis, or interpretation of the data.  
9

10 513

### 11 12 514 **Competing interests**

13  
14  
15 515 The authors do not report any conflicts of interest  
16

17 516

### 18 19 517 **Ethics approval and consent to participate**

20  
21 518 The study was approved by the Institutional Review Board of INSERM (IRB Inserm  
22  
23 519 n°IRB0000388 FWA00005831) and the National Commission for Data Protection and  
24  
25 520 Liberties (CNIL n° 909216), and registered at:

26  
27  
28 521 <https://clinicaltrials.gov/ct2/show/NCT02769455>. Electronic consent was obtained from each  
29  
30 522 participant of the trial.  
31

32 523

### 33 34 35 524 **Data sharing**

36  
37 525 All data supporting the findings of this study are included in the present article or the  
38  
39 526 supplemental material. No additional data available.  
40  
41  
42  
43  
44  
45  
46  
47  
48  
49  
50  
51  
52  
53  
54  
55  
56  
57  
58  
59  
60



## REFERENCES

- 1  
2  
3  
4  
5  
6  
7  
8 527 1 World Health Organization. Diet, Nutrition and the Prevention of Chronic Diseases. In WHO Technical  
9 528 Report Series; 916; WHO: Geneva, Switzerland. 2003.
- 10 529 2 Afshin A, Sur PJ, Fay KA, *et al*. Health effects of dietary risks in 195 countries, 1990–2017: a systematic  
11 530 analysis for the Global Burden of Disease Study 2017. *The Lancet* 2019;**393**:1958–72. doi:10.1016/S0140-  
12 531 6736(19)30041-8
- 13  
14 532 3 L'état de santé de la population en France - RAPPORT 2017 - Ministère des Solidarités et de la Santé.  
15 533 [https://drees.solidarites-sante.gouv.fr/etudes-et-statistiques/publications/recueils-ouvrages-et-](https://drees.solidarites-sante.gouv.fr/etudes-et-statistiques/publications/recueils-ouvrages-et-rapports/recueils-annuels/l-etat-de-sante-de-la-population/article/l-etat-de-sante-de-la-population-en-france-rapport-2017)  
16 534 [rapports/recueils-annuels/l-etat-de-sante-de-la-population/article/l-etat-de-sante-de-la-population-en-france-](https://drees.solidarites-sante.gouv.fr/etudes-et-statistiques/publications/recueils-ouvrages-et-rapports/recueils-annuels/l-etat-de-sante-de-la-population/article/l-etat-de-sante-de-la-population-en-france-rapport-2017)  
17 535 [rapport-2017](https://drees.solidarites-sante.gouv.fr/etudes-et-statistiques/publications/recueils-ouvrages-et-rapports/recueils-annuels/l-etat-de-sante-de-la-population/article/l-etat-de-sante-de-la-population-en-france-rapport-2017) (accessed 5 Feb 2019).
- 18  
19 536 4 Santé Publique France. Etude ESTEBAN 2014-2016 – Chapitre corpulence : stabilisation du surpoids et de  
20 537 l'obésité chez l'enfant et l'adulte. 2017. [https://www.santepubliquefrance.fr/les-actualites/2017/etude-](https://www.santepubliquefrance.fr/les-actualites/2017/etude-esteban-2014-2016-chapitre-corpulence-stabilisation-du-surpoids-et-de-l-obesite-chez-l-enfant-et-l-adulte)  
21 538 [esteban-2014-2016-chapitre-corpulence-stabilisation-du-surpoids-et-de-l-obesite-chez-l-enfant-et-l-adulte](https://www.santepubliquefrance.fr/les-actualites/2017/etude-esteban-2014-2016-chapitre-corpulence-stabilisation-du-surpoids-et-de-l-obesite-chez-l-enfant-et-l-adulte)  
22 539 (accessed 22 Oct 2019).
- 23  
24 540 5 Santé Publique France. Prévalence et incidence du diabète.  
25 541 2019. [https://www.santepubliquefrance.fr/maladies-et-traumatismes/diabete/articles/prevalence-et-](https://www.santepubliquefrance.fr/maladies-et-traumatismes/diabete/articles/prevalence-et-incidence-du-diabete)  
26 542 [incidence-du-diabete](https://www.santepubliquefrance.fr/maladies-et-traumatismes/diabete/articles/prevalence-et-incidence-du-diabete) (accessed 13 Jan 2020).
- 27  
28 543 6 Hong SW, Oh SW, Lee C, *et al*. Association between nutrition label use and chronic disease in Korean  
29 544 adults: the Fourth Korea National Health and Nutrition Examination Survey 2008-2009. *JKorean MedSci*  
30 545 2014;**29**:1457–63.
- 31  
32 546 7 Cannoosamy K, Jeewon R. *A critical assessment of nutrition labelling and determinants of its use and*  
33 547 *understanding*. Progress in Nutrition 2016.
- 34  
35 548 8 Lewis JE, Arheart KL, LeBlanc WG, *et al*. Food label use and awareness of nutritional information and  
36 549 recommendations among persons with chronic disease. *AmJClinNutr* 2009;**90**:1351–7.
- 37  
38 550 9 Post RE, Mainous AG, Diaz VA, *et al*. Use of the nutrition facts label in chronic disease management:  
39 551 results from the National Health and Nutrition Examination Survey. *JAmDiet Assoc* 2010;**110**:628–32.
- 40  
41 552 10 Acton RB, Jones AC, Kirkpatrick SI, *et al*. Taxes and front-of-package labels improve the healthiness of  
42 553 beverage and snack purchases: a randomized experimental marketplace. *Int J Behav Nutr Phys Act* 2019;**16**.  
43 554 doi:10.1186/s12966-019-0799-0
- 44  
45 555 11 Ares G, Varela F, Machin L, *et al*. Comparative performance of three interpretative front-of-pack nutrition  
46 556 labelling schemes: Insights for policy making. *Food Qual Prefer* 2018;**68**:215–25.  
47 557 doi:10.1016/j.foodqual.2018.03.007
- 48  
49 558 12 Carrad AM, Louie JC-Y, Milosavljevic M, *et al*. Consumer support for healthy food and drink vending  
50 559 machines in public places. *Aust N Z J Public Health* 2015;**39**:355–7. doi:10.1111/1753-6405.12386
- 51  
52 560 13 Finkelstein EA, Li W, Melo G, *et al*. Identifying the effect of shelf nutrition labels on consumer purchases:  
53 561 results of a natural experiment and consumer survey. *Am J Clin Nutr* 2018;**107**:647–51.  
54 562 doi:10.1093/ajcn/nqy014
- 55  
56 563 14 Ministère des Solidarités et de la Santé. Evaluation ex ante de systèmes d'étiquetage nutritionnel graphique  
57 564 simplifié - Rapport final du Comité scientifique. 2017. [https://solidarites-](https://solidarites-sante.gouv.fr/IMG/pdf/rapport_comite_scientifique_etiquetage_nutritionnel_150317.pdf)  
58 565 [sante.gouv.fr/IMG/pdf/rapport\\_comite\\_scientifique\\_etiquetage\\_nutritionnel\\_150317.pdf](https://solidarites-sante.gouv.fr/IMG/pdf/rapport_comite_scientifique_etiquetage_nutritionnel_150317.pdf) (accessed 26 Jul  
59 566 2019).

- 1  
2  
3 567 15 Mora-García CA, Tobar LF, Young JC. The Effect of Randomly Providing Nutri-Score Information on  
4 568 Actual Purchases in Colombia. *Nutrients* 2019;**11**. doi:10.3390/nu11030491
- 5  
6 569 16 Ruffieux B, Muller L. Etude sur l'influence de divers systèmes d'étiquetage nutritionnel sur la composition  
7 570 du panier d'achat alimentaire. 2011.
- 8  
9 571 17 Thorndike AN, Riis J, Sonnenberg LM, *et al*. Traffic-light labels and choice architecture: promoting healthy  
10 572 food choices. *Am J Prev Med* 2014;**46**:143–9. doi:10.1016/j.amepre.2013.10.002
- 11  
12 573 18 Julia C, Hercberg S. Development of a new front-of-pack nutrition label in France: the five-colour Nutri-  
13 574 Score. *Public Health Panor* 2017;**3**:537–820.
- 14  
15 575 19 Storcksdieck Genannt Bonsmann S, Marandola G, Ciriolo E, *et al*. Front-of-pack nutrition labelling  
16 576 schemes: a comprehensive review. Luxembourg: : Publications Office of the European Union 2020.  
17 577 [https://ec.europa.eu/jrc/en/publication/eur-scientific-and-technical-research-reports/front-pack-nutrition-](https://ec.europa.eu/jrc/en/publication/eur-scientific-and-technical-research-reports/front-pack-nutrition-labelling-schemes-comprehensive-review)  
18 578 [labelling-schemes-comprehensive-review](https://ec.europa.eu/jrc/en/publication/eur-scientific-and-technical-research-reports/front-pack-nutrition-labelling-schemes-comprehensive-review) (accessed 26 Aug 2020).
- 19  
20 579 20 Young L, Swinburn B. Impact of the Pick the Tick food information programme on the salt content of food  
21 580 in New Zealand. *Health Promot* 2002;**17**:13–9.
- 22  
23 581 21 Vyth EL, Steenhuis IH, Roodenburg AJ, *et al*. Front-of-pack nutrition label stimulates healthier product  
24 582 development: a quantitative analysis. *IntJBehavNutrPhysAct* 2010;**7**:65.
- 25  
26 583 22 Communiqué de presse. Marisol Touraine se félicite des résultats des études sur l'impact d'un logo  
27 584 nutritionnel : leur intérêt et l'efficacité du logo Nutri-score sont démontrés. Paris, Ministère des Affaires  
28 585 sociales et de la Santé. 2017.
- 29  
30 586 23 Anses, INRA, Oqali. Déploiement du Nutri-Score: analyse à partir des données transmises à l'Oqali. Paris:  
31 587 2019.
- 32  
33 588 24 CREDOC. Les enquêtes complémentaires. Etude Quantitative. Paris, Ministère des Affaires sociales et de la  
34 589 Santé. 2017. [http://social-sante.gouv.fr/IMG/pdf/rapport-credoc-fev\\_2017](http://social-sante.gouv.fr/IMG/pdf/rapport-credoc-fev_2017).
- 35  
36 590 25 Julia C, Blanchet O, Mejean C, *et al*. Impact of the front-of-pack 5-colour nutrition label (5-CNL) on the  
37 591 nutritional quality of purchases: an experimental study. *IntJBehavNutrPhysAct* 2016;**13**:101-.
- 38  
39 592 26 Ducrot P, Julia C, Mejean C, *et al*. Impact of Different Front-of-Pack Nutrition Labels on Consumer  
40 593 Purchasing Intentions: A Randomized Controlled Trial. *AmJPrevMed* 2016;**50**:627–36.
- 41  
42 594 27 Crosetto P, Lacroix A, Muller L, *et al*. Nutritional and economic impact of five alternative front-of-pack  
43 595 nutritional labels: experimental evidence. *Eur Rev Agric Econ* Published Online First: 21 August 2019.  
44 596 doi:10.1093/erae/jbz037
- 45  
46 597 28 Egnell M, Boutron I, Péneau S, *et al*. Front-of-Pack Labeling and the Nutritional Quality of Students' Food  
47 598 Purchases: A 3-Arm Randomized Controlled Trial. *Am J Public Health* 2019;**109**:1122–9.  
48 599 doi:10.2105/AJPH.2019.305115
- 49  
50 600 29 Food and Drink Federation. Reference Intakes (previously Guideline Daily Amounts). Food Label. Tool  
51 601 Help Improve Food Lit. Consum. 2017.<http://www.foodlabel.org.uk/label/reference-intakes.aspx> (accessed  
52 602 5 Feb 2017).
- 53  
54 603 30 Hercberg S, Castetbon K, Czernichow S, *et al*. The Nutrinet-Sante Study: a web-based prospective study on  
55 604 the relationship between nutrition and health and determinants of dietary patterns and nutritional status.  
56 605 *BMCPublic Health* 2010;**10**:242-.
- 57  
58 606 31 Feunekes GI, Gortemaker IA, Willems AA, *et al*. Front-of-pack nutrition labelling: testing effectiveness of  
59 607 different nutrition labelling formats front-of-pack in four European countries. *Appetite* 2008;**50**:57–70.
- 60  
608 32 Hersey JC, Wohlgenant KC, Arsenault JE, *et al*. Effects of front-of-package and shelf nutrition labeling  
609 609 systems on consumers. *NutrRev* 2013;**71**:1–14.

- 1  
2  
3 610 33 Aschemann-Witzel J, Grunert KG, van Trijp HC, *et al.* Effects of nutrition label format and product  
4 611 assortment on the healthfulness of food choice. *Appetite* 2013;**71**:63–74.
- 5  
6 612 34 Malam S, Clegg S, Kirwan S, *et al.* Comprehension and Use of UK Nutrition Signpost Labelling Schemes.  
7 613 University of Surrey : Guildford, UK: 2009.
- 8  
9 614 35 Mejean C, Macouillard P, Peneau S, *et al.* Consumer acceptability and understanding of front-of-pack  
10 615 nutrition labels. *JHumNutrDiet* 2013;**26**:494–503.
- 11  
12 616 36 Egnell M, Ducrot P, Touvier M, *et al.* Objective understanding of Nutri-Score Front-Of-Package nutrition  
13 617 label according to individual characteristics of subjects: Comparisons with other format labels. *PloS One*  
14 618 2018;**13**:e0202095. doi:10.1371/journal.pone.0202095
- 15  
16 619 37 Egnell M, Talati Z, Hercberg S, *et al.* Objective Understanding of Front-of-Package Nutrition Labels: An  
17 620 International Comparative Experimental Study across 12 Countries. *Nutrients* 2018;**10**.  
18 621 doi:10.3390/nu10101542
- 19  
20 622 38 Helfer P, Shultz TR. The effects of nutrition labeling on consumer food choice: a psychological experiment  
21 623 and computational model. *AnnNYAcadSci* 2014;**1331**:174–85.
- 22  
23 624 39 Kreuter MW, Brennan LK, Scharff DP, *et al.* Do nutrition label readers eat healthier diets? Behavioral  
24 625 correlates of adults' use of food labels. *Am J Prev Med* 1997;**13**:277–83.
- 25  
26 626 40 Adriouch S, Lelong H, Kesse-Guyot E, *et al.* Compliance with Nutritional and Lifestyle Recommendations  
27 627 in 13,000 Patients with a Cardiometabolic Disease from the Nutrinet-Santé Study. *Nutrients* 2017;**9**.  
28 628 doi:10.3390/nu9060546
- 29  
30 629 41 Egnell M, Boutron I, Péneau S, *et al.* Randomised controlled trial in an experimental online supermarket  
31 630 testing the effects of front-of-pack nutrition labelling on food purchasing intentions in a low-income  
32 631 population. *BMJ Open* 2021;**11**:e041196. doi:10.1136/bmjopen-2020-041196
- 33  
34 632 42 Egnell M, Galan P, Fialon M, *et al.* The impact of the Nutri-Score front-of-pack nutrition label on  
35 633 purchasing intentions of unprocessed and processed foods: post-hoc analyses from three randomized  
36 634 controlled trials. *Int J Behav Nutr Phys Act* 2021;**18**:38. doi:10.1186/s12966-021-01108-9
- 37  
38 635 43 Vandevijvere S, Berger N. The impact of shelf tags with Nutri-Score on consumer purchases: a difference-  
39 636 in-difference analysis of a natural experiment in supermarkets of a major retailer in Belgium. *Int J Behav*  
40 637 *Nutr Phys Act* 2021;**18**:150. doi:10.1186/s12966-021-01207-7
- 41  
42 638 44 Talati Z, Pettigrew S, Kelly B, *et al.* Consumers' responses to front-of-pack labels that vary by interpretive  
43 639 content. *Appetite* 2016;**101**:205–13. doi:10.1016/j.appet.2016.03.009
- 44  
45 640 45 Bix L, Sundar RP, Bello NM, *et al.* To See or Not to See: Do Front of Pack Nutrition Labels Affect  
46 641 Attention to Overall Nutrition Information? *PLOS ONE* 2015;**10**:e0139732.  
47 642 doi:10.1371/journal.pone.0139732
- 48  
49 643 46 Sharpe KM, Staelin R, Huber J. Using extremeness aversion to fight obesity: Policy implications of contact  
50 644 dependent demand. *J Consum Res* 2008.
- 51  
52 645 47 Egnell M, Crosetto P, d'Almeida T, *et al.* Modelling the impact of different front-of-package nutrition  
53 646 labels on mortality from non-communicable chronic disease. *Int J Behav Nutr Phys Act* 2019;**16**:56.  
54 647 doi:10.1186/s12966-019-0817-2
- 55  
56  
57  
58  
59  
60

1  
2  
3 **Figure 1** An example of a food product in the Nutri-Score (1), Reference Intakes (2), and no  
4 label (3) arms. Images developed by the co-authors.  
5  
6  
7  
8  
9

10 **Figure 2** Flow diagram of the randomized controlled trial  
11  
12

13 \* Subjects who validated their online shopping cart and did not encounter technical issues  
14  
15  
16  
17  
18  
19  
20  
21  
22  
23  
24  
25  
26  
27  
28  
29  
30  
31  
32  
33  
34  
35  
36  
37  
38  
39  
40  
41  
42  
43  
44  
45  
46  
47  
48  
49  
50  
51  
52  
53  
54  
55  
56  
57  
58  
59  
60

For peer review only

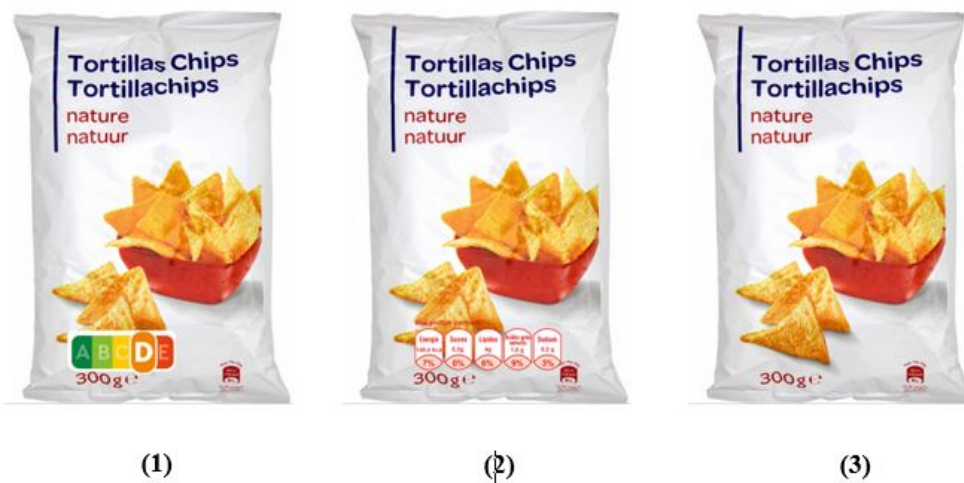

An example of a food product in the Nutri-Score (1), Reference Intakes (2), and no label (3) arms. Images developed by the co-authors.

56x28mm (300 x 300 DPI)

1  
2  
3  
4  
5  
6  
7  
8  
9  
10  
11  
12  
13  
14  
15  
16  
17  
18  
19  
20  
21  
22  
23  
24  
25  
26  
27  
28  
29  
30  
31  
32  
33  
34  
35  
36  
37  
38  
39  
40  
41  
42  
43  
44  
45  
46  
47  
48  
49  
50  
51  
52  
53  
54  
55  
56  
57  
58  
59  
60

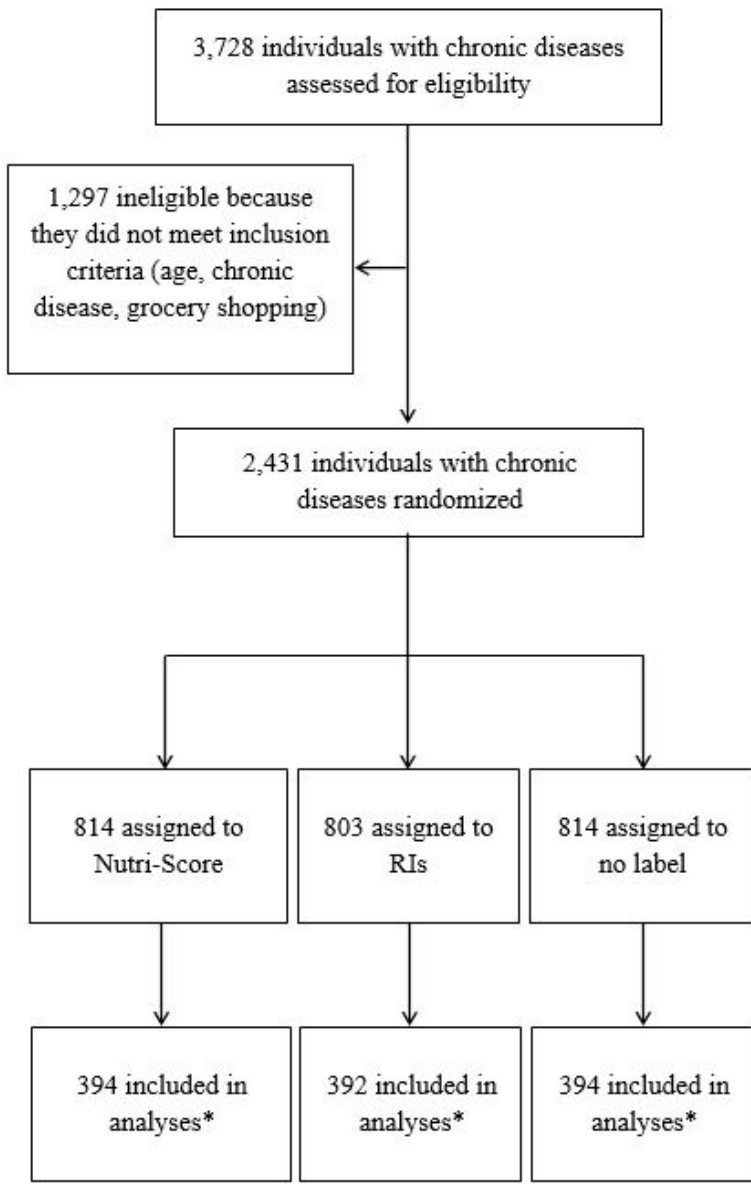

Flow diagram of the randomized controlled trial

36x55mm (300 x 300 DPI)

**Table S1** Individual characteristics of respondents and non-respondents in the randomized controlled trial by randomization group, France, 2017

|                                                | Nutri-Score |                 | Reference Intakes |                 | No label    |                 | <i>P</i> <sup>a</sup> |
|------------------------------------------------|-------------|-----------------|-------------------|-----------------|-------------|-----------------|-----------------------|
|                                                | Respondents | Non-respondents | Respondents       | Non-respondents | Respondents | Non-respondents |                       |
| <b>Total (n)</b>                               | 394         | 420             | 392               | 411             | 394         | 420             |                       |
| <b>Sex, n(%)</b>                               |             |                 |                   |                 |             |                 | 0.5                   |
| Men                                            | 131 (33.2)  | 158 (37.6)      | 124 (31.6)        | 143 (34.8)      | 152 (38.6)  | 157 (37.4)      |                       |
| Women                                          | 263 (66.8)  | 262 (62.4)      | 268 (68.4)        | 268 (65.2)      | 242 (61.4)  | 263 (62.6)      |                       |
| <b>Age, years</b>                              | 64.8 ± 6.9  | 65.8 ± 7.5      | 64.8 ± 7.3        | 66.5 ± 7.1      | 65.4 ± 7.1  | 66.2 ± 7.2      | 0.5                   |
| <b>Educational level</b>                       |             |                 |                   |                 |             |                 | 0.2                   |
| Primary                                        | 122 (31)    | 131 (31.2)      | 102 (26)          | 140 (34.1)      | 104 (26.4)  | 131 (31.2)      |                       |
| Secondary                                      | 53 (13.5)   | 83 (19.8)       | 51 (13)           | 77 (18.7)       | 74 (18.8)   | 71 (16.9)       |                       |
| University, undergraduate degree               | 103 (26.1)  | 94 (22.4)       | 122 (31.1)        | 98 (23.8)       | 99 (25.1)   | 103 (24.5)      |                       |
| University, postgraduate degree                | 98 (24.9)   | 93 (22.1)       | 102 (26)          | 77 (18.7)       | 103 (26.1)  | 102 (24.3)      |                       |
| Other                                          | 18 (4.6)    | 19 (4.5)        | 15 (3.8)          | 19 (4.6)        | 14 (3.6)    | 13 (3.1)        |                       |
| <b>Grocery shopping frequency, n(%)</b>        |             |                 |                   |                 |             |                 | 0.6                   |
| Always                                         | 231 (58.6)  | 235 (56)        | 252 (64.3)        | 229 (55.7)      | 239 (60.7)  | 245 (58.3)      |                       |
| Often                                          | 122 (31)    | 134 (31.9)      | 107 (27.3)        | 128 (31.1)      | 113 (28.7)  | 127 (30.2)      |                       |
| Sometimes                                      | 41 (10.4)   | 51 (12.1)       | 33 (8.4)          | 54 (13.1)       | 42 (10.7)   | 48 (11.4)       |                       |
| <b>Online grocery shopping, yes n(%)</b>       | 119 (30.2)  | 96 (22.9)       | 129 (32.9)        | 102 (24.8)      | 103 (26.1)  | 109 (26)        | 0.2                   |
| <b>Online grocery shopping frequency, n(%)</b> |             |                 |                   |                 |             |                 | 0.4                   |
| At least one time per week                     | 16 (13.4)   | 8 (8.3)         | 20 (15.5)         | 14 (13.7)       | 21 (20.4)   | 13 (11.9)       |                       |
| One or two times per month                     | 22 (18.5)   | 25 (26)         | 26 (20.2)         | 20 (19.6)       | 15 (14.6)   | 25 (22.9)       |                       |
| One time every two or three months             | 29 (24.4)   | 15 (15.6)       | 33 (25.6)         | 23 (22.5)       | 17 (16.5)   | 22 (20.2)       |                       |
| One or two times per year                      | 23 (19.3)   | 23 (24)         | 21 (16.3)         | 29 (28.4)       | 29 (28.2)   | 32 (29.4)       |                       |
| Less than one time per year                    | 29 (24.4)   | 25 (26)         | 29 (22.5)         | 16 (15.7)       | 21 (20.4)   | 17 (15.6)       |                       |
| <b>Weekly budget for grocery shopping (€)</b>  |             |                 |                   |                 |             |                 | 0.2                   |
| ≤30€                                           | 13 (3.3)    | 20 (4.8)        | 17 (4.3)          | 10 (2.4)        | 16 (4.1)    | 6 (1.4)         |                       |
| 30 – 50€                                       | 76 (19.3)   | 65 (15.5)       | 74 (18.9)         | 78 (19)         | 63 (16)     | 65 (15.5)       |                       |
| 50 – 100€                                      | 151 (38.3)  | 159 (37.9)      | 168 (42.9)        | 158 (38.4)      | 160 (40.6)  | 164 (39)        |                       |
| ≥100€                                          | 151 (38.3)  | 154 (36.7)      | 130 (33.2)        | 140 (34.1)      | 147 (37.3)  | 167 (39.8)      |                       |
| Missing                                        | 3 (0.8)     | 22 (5.2)        | 3 (0.8)           | 25 (6.1)        | 8 (2)       | 18 (4.3)        |                       |
| <b>Perceived nutritional knowledge, n(%)</b>   |             |                 |                   |                 |             |                 | 0.1                   |
| High                                           | 38 (9.6)    | 33 (7.9)        | 38 (9.7)          | 26 (6.3)        | 22 (5.6)    | 44 (10.5)       |                       |
| Intermediate                                   | 222 (56.3)  | 226 (53.8)      | 220 (56.1)        | 231 (56.2)      | 233 (59.1)  | 221 (52.6)      |                       |
| Low                                            | 125 (31.7)  | 135 (32.1)      | 125 (31.9)        | 125 (30.4)      | 124 (31.5)  | 132 (31.4)      |                       |
| No                                             | 9 (2.3)     | 9 (2.1)         | 7 (1.8)           | 7 (1.7)         | 9 (2.3)     | 6 (1.4)         |                       |
| Missing data                                   | 0           | 17 (4)          | 2 (0.5)           | 22 (5.4)        | 6 (1.5)     | 17 (4)          |                       |
| <b>Nutrition facts reading frequency, n(%)</b> |             |                 |                   |                 |             |                 | 0.3                   |
| Always                                         | 63 (16)     | 68 (16.2)       | 55 (14)           | 58 (14.1)       | 54 (13.7)   | 71 (16.9)       |                       |
| Often                                          | 202 (51.3)  | 190 (45.2)      | 199 (50.8)        | 210 (51.1)      | 206 (52.3)  | 177 (42.1)      |                       |
| Sometimes                                      | 117 (29.7)  | 127 (30.2)      | 122 (31.1)        | 106 (25.8)      | 119 (30.2)  | 142 (33.8)      |                       |
| Never                                          | 12 (3)      | 18 (4.3)        | 14 (3.6)          | 15 (3.6)        | 9 (2.3)     | 13 (3.1)        |                       |
| Missing data                                   | 0           | 17 (4)          | 2 (0.5)           | 22 (5.4)        | 6 (1.5)     | 17 (4)          |                       |

Values are mean ± standard deviation or n (%) as appropriate.

<sup>a</sup> A multivariable logistic regression was conducted to model the probability of non-response depending on the individual sociodemographic and lifestyle characteristics and the arm of randomization. The *P* corresponds to the p-value of the interaction term between the individual characteristic and the trial arm. The comparison of the educational level and weekly budget for grocery shopping variables between respondents and non-respondents were not performed given that information was missing for non-respondents.



1  
2  
3  
4  
5  
6  
7  
8  
9  
10  
11  
12  
13  
14  
15  
16  
17  
18  
19  
20  
21  
22  
23  
24  
25  
26  
27  
28  
29  
30  
31  
32  
33  
34  
35  
36  
37  
38  
39  
40  
41  
42  
43  
44  
45  
46

**Table S2** Overall nutritional quality, energy and nutrient content for 100g of the shopping cart among labelled products only

|                                                   | Nutri-Score     | Reference Intakes | No label       | P-value           | Nutri-Score vs no label |                      | Nutri-Score vs Reference Intakes |                      | Reference Intakes vs no label |                      |
|---------------------------------------------------|-----------------|-------------------|----------------|-------------------|-------------------------|----------------------|----------------------------------|----------------------|-------------------------------|----------------------|
|                                                   | N=369           | N=390             | N=392          |                   | Difference <sup>a</sup> | P-value <sup>b</sup> | Difference <sup>a</sup>          | P-value <sup>b</sup> | Difference <sup>a</sup>       | P-value <sup>b</sup> |
| Overall nutritional quality (FSAm-NPS score/100g) | 4.35 (3.5)      | 4.27 (3.43)       | 4.49 (3.41)    | 0.7               | -0.13 (-0.72;0.45)      | 0.9                  | 0.08 (-0.51;0.67)                | 0.9                  | -0.21 (-0.79;0.36)            | 0.7                  |
| Calories (kcal/100g)                              | 188.42 (111.64) | 237.94 (80.74)    | 226.59 (85.24) | <b>&lt;0.0001</b> | -38.16 (-54.02;-22.3)   | <b>&lt;0.0001</b>    | -49.52 (-65.39;-33.64)           | <b>&lt;0.0001</b>    | 11.35 (-4.28;26.99)           | 0.2                  |
| Saturated fatty acids (g/100g)                    | 4.60 (4.48)     | 5.34 (2.97)       | 5.43 (3.28)    | <b>0.003</b>      | -0.83 (-1.45;-0.22)     | <b>0.004</b>         | -0.74 (-1.36;-0.13)              | <b>0.01</b>          | -0.09 (-0.70;0.52)            | 0.9                  |
| Sugars (g/100g)                                   | 5.80 (5.16)     | 6.45 (4.23)       | 6.43 (6.00)    | 0.1               | -0.63 (-1.51;0.25)      | 0.2                  | -0.66 (-1.54;0.23)               | 0.2                  | 0.03 (-0.84;0.9)              | 1.0                  |
| Sodium (mg/100g)                                  | 267.67 (284.89) | 252.19 (130.25)   | 267.10 (200.7) |                   |                         |                      |                                  |                      |                               |                      |
| Fiber (g/100g)                                    | 1.45 (1.56)     | 2.27 (1.74)       | 1.95 (1.54)    |                   |                         |                      |                                  |                      |                               |                      |
| Fruits and vegetables (%)                         | 17.98 (20.94)   | 17.48 (13.99)     | 16.95 (12.61)  |                   |                         |                      |                                  |                      |                               |                      |
| Proteins (g/100g)                                 | 6.35 (4.31)     | 7.89 (2.87)       | 7.99 (3.92)    |                   |                         |                      |                                  |                      |                               |                      |

<sup>a</sup> Mean difference (95% Confidence Interval)

<sup>b</sup> P-value using Tukey's multiple comparisons tests. Boldface indicates statistical significance (p-value≤0.05). FSAm-NPS: modified Food Standards Agency Nutrient Profiling System.

**Table S3** Sensitivity analyses: overall nutritional quality, energy and nutrient content for 100g of the shopping cart excluding outliers on the spending amount

|                                                   | Nutri-Score     | Reference Intakes | No label       | P-value           | Nutri-Score vs no label |                      | Nutri-Score vs Reference Intakes |                      | Reference Intakes vs no label |                      |
|---------------------------------------------------|-----------------|-------------------|----------------|-------------------|-------------------------|----------------------|----------------------------------|----------------------|-------------------------------|----------------------|
|                                                   | N=351           | N=354             | N=357          |                   | Difference <sup>a</sup> | P-value <sup>b</sup> | Difference <sup>a</sup>          | P-value <sup>b</sup> | Difference <sup>a</sup>       | P-value <sup>b</sup> |
| Overall nutritional quality (FSAm-NPS score/100g) | 0.99 (3.30)     | 1.69 (2.84)       | 1.8 (2.58)     | <b>0.0004</b>     | -0.81 (-1.32;-0.29)     | <b>0.0007</b>        | -0.69 (-1.21;-0.17)              | <b>0.005</b>         | -0.12 (-0.63;0.40)            | 0.9                  |
| Calories (kcal/100g)                              | 152.06 (74.84)  | 180.89 (58.10)    | 173.53 (57.8)  | <b>&lt;0.0001</b> | -21.47 (-32.77;-10.17)  | <b>&lt;0.0001</b>    | -28.83 (-40.15;-17.51)           | <b>&lt;0.0001</b>    | 7.36 (-3.91;18.63)            | 0.3                  |
| Saturated fatty acids (g/100g)                    | 3.19 (2.73)     | 3.76 (2.02)       | 3.78 (2.03)    | <b>0.0005</b>     | -0.59 (-0.99;-0.18)     | <b>0.002</b>         | -0.58 (-0.98;-0.17)              | <b>0.002</b>         | -0.01 (-0.41;0.39)            | 1.0                  |
| Sugars (g/100g)                                   | 5.9 (3.31)      | 5.79 (2.93)       | 5.61 (3.10)    | 0.5               | 0.29 (-0.26;0.84)       | 0.4                  | 0.11 (-0.44;0.66)                | 0.9                  | 0.18 (-0.36;0.73)             | 0.7                  |
| Sodium (mg/100g)                                  | 171.75 (144.16) | 193.37 (96.17)    | 205.5 (143.31) |                   |                         |                      |                                  |                      |                               |                      |
| Fiber (g/100g)                                    | 1.41 (1.01)     | 1.91 (1.17)       | 1.67 (0.96)    |                   |                         |                      |                                  |                      |                               |                      |
| Fruits and vegetables (%)                         | 35.29 (22.57)   | 30.66 (14.69)     | 30.11 (13.93)  |                   |                         |                      |                                  |                      |                               |                      |
| Proteins (g/100g)                                 | 7.30 (3.25)     | 7.25 (2.03)       | 7.53 (2.92)    |                   |                         |                      |                                  |                      |                               |                      |

<sup>a</sup> Mean difference (95% Confidence Interval)

<sup>b</sup> P-value using Tukey's multiple comparisons tests. Boldface indicates statistical significance (p-value≤0.05). Participants whose spending amount was below the 5<sup>th</sup> or over the 95<sup>th</sup> percentile of the distribution of the cost of the shopping carts in the sample were excluded. FSAm-NPS: modified Food Standards Agency Nutrient Profiling System.



**Table S4** Sensitivity analyses using multiple imputations: overall nutritional quality, energy and nutrient content for 100g of the shopping cart

|                                                   | Nutri-Score     | Reference Intakes | No label        | P-value       | Nutri-Score vs no label |                      | Nutri-Score vs Reference Intakes |                      | Reference Intakes vs no label |                      |
|---------------------------------------------------|-----------------|-------------------|-----------------|---------------|-------------------------|----------------------|----------------------------------|----------------------|-------------------------------|----------------------|
|                                                   | N=814           | N=803             | N=814           |               | Difference <sup>a</sup> | P-value <sup>b</sup> | Difference <sup>a</sup>          | P-value <sup>b</sup> | Difference <sup>a</sup>       | P-value <sup>b</sup> |
| Overall nutritional quality (FSAm-NPS score/100g) | 1.51 (1.87)     | 1.78 (1.87)       | 1.84 (2.04)     | 0.1           | -0.33 (-0.69;0.03)      | 0.07                 | -0.27 (-0.63;0.08)               | 0.1                  | -0.06 (-0.43;0.32)            | 0.8                  |
| Calories (kcal/100g)                              | 162.95 (41.32)  | 177.21 (39.24)    | 173.24 (44.67)  | <b>0.0009</b> | -10.28 (-18.26;2.31)    | <b>0.01</b>          | -14.26 (-21.87;6.65)             | <b>0.0003</b>        | 3.98 (-4.09;12.05)            | 0.3                  |
| Saturated fatty acids (g/100g)                    | 3.43 (1.62)     | 3.68 (1.41)       | 3.70 (1.64)     | 0.1           | -0.27 (-0.56;0.02)      | 0.07                 | -0.25 (-0.54;0.04)               | 0.1                  | -0.02 (-0.32;0.28)            | 0.9                  |
| Sugars (g/100g)                                   | 5.86 (2.11)     | 5.86 (2.02)       | 5.74 (2.22)     | 0.6           | 0.12 (-0.32;0.55)       | 0.6                  | -0.01 (-0.46;0.45)               | 1.0                  | 0.12 (-0.30;0.54)             | 0.6                  |
| Sodium (mg/100g)                                  | 194.73 (102.46) | 196.38 (97.05)    | 205.54 (113.03) |               |                         |                      |                                  |                      |                               |                      |
| Fiber (g/100g)                                    | 1.51 (0.62)     | 1.76 (0.64)       | 1.64 (0.68)     |               |                         |                      |                                  |                      |                               |                      |
| Fruits and vegetables (%)                         | 32.25 (10.94)   | 30.12 (10.35)     | 29.78 (11.19)   |               |                         |                      |                                  |                      |                               |                      |
| Proteins (g/100g)                                 | 7.41 (1.73)     | 7.35 (1.86)       | 7.48 (1.97)     |               |                         |                      |                                  |                      |                               |                      |

<sup>a</sup> Mean difference (95% Confidence Interval)<sup>b</sup> P-value using Tukey's multiple comparisons tests. Boldface indicates statistical significance (p-value≤0.05). FSAm-NPS: modified Food Standards Agency Nutrient Profiling System.**Table S5** Sensitivity analyses using multiple imputations: overall nutritional quality, energy and nutrient content for 100g of the shopping cart among labelled products only

|                                                   | Nutri-Score     | Reference Intakes | No label        | P-value      | Nutri-Score vs no label |                      | Nutri-Score vs Reference Intakes |                      | Reference Intakes vs no label |                      |
|---------------------------------------------------|-----------------|-------------------|-----------------|--------------|-------------------------|----------------------|----------------------------------|----------------------|-------------------------------|----------------------|
|                                                   | N=789           | N=801             | N=812           |              | Difference <sup>a</sup> | P-value <sup>b</sup> | Difference <sup>a</sup>          | P-value <sup>b</sup> | Difference <sup>a</sup>       | P-value <sup>b</sup> |
| Overall nutritional quality (FSAm-NPS score/100g) | 3.51 (11.8)     | 3.52 (11.82)      | 3.61 (11.53)    | 0.6          | -0.10 (-0.57;0.36)      | 0.7                  | -0.01 (-0.46;0.43)               | 1.0                  | -0.09 (-0.53;0.35)            | 0.7                  |
| Calories (kcal/100g)                              | 176.66 (343.52) | 201.81 (344.94)   | 195.53 (330.17) | <b>0.001</b> | -18.87 (-31.27;-6.5)    | <b>0.003</b>         | -25.15 (-38.22;-12.09)           | <b>0.0002</b>        | -6.29 (-5.17;17.74)           | 0.3                  |
| Saturated fatty acids (g/100g)                    | 3.97 (14.84)    | 4.34 (15.04)      | 4.37 (14.67)    | 0.2          | -0.41 (-0.88;0.06)      | 0.09                 | -0.38 (-0.88;0.12)               | 0.1                  | -0.03 (-0.47;0.41)            | 0.9                  |
| Sugars (g/100g)                                   | 4.64 (19.27)    | 4.99 (19.48)      | 4.96 (19.33)    | 0.5          | -0.32 (-0.97;0.33)      | 0.3                  | -0.35 (-0.97;0.28)               | 0.3                  | 0.02 (-0.63;0.68)             | 0.9                  |
| Sodium (mg/100g)                                  | 220.7 (688.19)  | 216.53 (675.15)   | 221.69 (672.91) |              |                         |                      |                                  |                      |                               |                      |
| Fiber (g/100g)                                    | 1.43 (5.42)     | 1.83 (5.44)       | 1.68 (5.27)     |              |                         |                      |                                  |                      |                               |                      |
| Fruits and vegetables (%)                         | 16.76 (50.37)   | 16.55 (50.69)     | 16.43 (49.19)   |              |                         |                      |                                  |                      |                               |                      |
| Proteins (g/100g)                                 | 6.12 (14.32)    | 6.86 (13.06)      | 6.89 (12.84)    |              |                         |                      |                                  |                      |                               |                      |

<sup>a</sup> Mean difference (95% Confidence Interval)<sup>b</sup> P-value using Tukey's multiple comparisons tests. Boldface indicates statistical significance (p-value≤0.05). FSAm-NPS: modified Food Standards Agency Nutrient Profiling System.

1  
2  
3  
4  
5  
6  
7  
8  
9  
10  
11  
12  
13  
14  
15  
16  
17  
18  
19  
20  
21  
22  
23  
24  
25  
26  
27  
28  
29  
30  
31  
32  
33  
34  
35  
36  
37  
38  
39  
40  
41  
42  
43  
44  
45  
46

**Table S6** Total quantities of calories and nutrients in the shopping carts purchased in the three arms of the trial

|                           | Nutri-Score      | Reference Intakes | No label         | P-value | Nutri-Score vs no label   |                      | Nutri-Score vs Reference Intakes |                      | Reference Intakes vs no label |                      |
|---------------------------|------------------|-------------------|------------------|---------|---------------------------|----------------------|----------------------------------|----------------------|-------------------------------|----------------------|
|                           | Mean (SD)        | Mean (SD)         | Mean (SD)        |         | Difference <sup>a</sup>   | P-value <sup>b</sup> | Difference <sup>a</sup>          | P-value <sup>b</sup> | Difference <sup>a</sup>       | P-value <sup>b</sup> |
| Calories (kcal)           | 2229.74(2336.45) | 3395.80(2232.5)   | 3173.73(2235.09) | <0.0001 | -943.99(-1323.29;-564.7)  | <0.0001              | -1166.06(-1545.84;-786.29)       | <0.0001              | 222.07(-157.71;601.85)        | 0.4                  |
| Saturated fatty acids (g) | 35.88(40.21)     | 53.08(37.21)      | 52.60(38.35)     | <0.0001 | -16.72(-23.18;-10.27)     | <0.0001              | -17.20(-23.66;-10.73)            | <0.0001              | 0.47(-5.99;6.94)              | 1.0                  |
| Sugars (g)                | 78.09(71.76)     | 116.70(90.74)     | 103.08(79.66)    | <0.0001 | -24.99(-38.54;-11.43)     | <0.0001              | -38.60(-52.17;-25.03)            | <0.0001              | 13.61(0.04;27.19)             | <b>0.05</b>          |
| Sodium (mg)               | 1914.81(2121.69) | 2875.46(2298.01)  | 2803.92(2232.81) | <0.0001 | -889.11(-1260.04;-518.19) | <0.0001              | -960.66(-1332.06;-589.26)        | <0.0001              | 71.54(-299.86;442.95)         | 0.9                  |
| Fiber (g)                 | 17.13(17.45)     | 29.81(21.11)      | 26.17(20.05)     | <0.0001 | -9.04(-12.32;-5.76)       | <0.0001              | -12.68(-15.96;-9.4)              | <0.0001              | 3.64(0.36;6.92)               | <b>0.03</b>          |
| Proteins (g)              | 98.66(92.33)     | 145.51(93.35)     | 142.44(94.72)    | <0.0001 | -43.78(-59.41;-28.15)     | <0.0001              | -46.85(-62.5;-31.2)              | <0.0001              | 3.07(-12.58;18.72)            | 0.9                  |

<sup>a</sup> Mean difference (95% Confidence Interval)

<sup>b</sup> P-value using Tukey's multiple comparisons tests. Boldface indicates statistical significance (p-value≤0.05). SD: Standard Deviation

**Table S7** Percentage of the number of products in the shopping cart from the different food categories

| Food groups                                            | Nutri-Score  | Reference Intakes | No label     |
|--------------------------------------------------------|--------------|-------------------|--------------|
| <b>Fruits, vegetables, legumes, grains and starchs</b> |              |                   |              |
| Fresh fruits                                           | 17,69(22,1)  | 7,14(6,76)        | 7,07(6,68)   |
| Processed fruits                                       | 1,96(8,99)   | 0,73(1,72)        | 0,82(2,05)   |
| Fresh vegetables                                       | 6,13(10,74)  | 10,76(9,87)       | 9,73(8,82)   |
| Processed vegetables                                   | 2,79(5,09)   | 4,22(5,14)        | 3,43(4,69)   |
| Legumes and potatoes                                   | 1,50(3,45)   | 3,08(4,64)        | 2,49(5,28)   |
| Seeds and dried fruits                                 | 0,81(2,44)   | 0,83(1,82)        | 1,08(3,14)   |
| <b>Dairy products</b>                                  | 10,25(11,77) | 12,46(10,36)      | 13,33(14,06) |
| <b>Cheeses</b>                                         | 2,96(5,01)   | 4,84(7,39)        | 5,17(6,15)   |
| <b>Meat, fish and processed foods</b>                  |              |                   |              |
| Pre-packed meat                                        | 0,11(0,68)   | 0,20(0,99)        | 0,21(0,83)   |
| Meat                                                   | 12,52(14,99) | 6,02(6,04)        | 6,94(10,14)  |
| Processed meats                                        | 4,64(11,25)  | 3,35(4,93)        | 3,5(5,25)    |
| Fresh fish                                             | 2,66(6,6)    | 2,71(5,94)        | 2,44(3,51)   |
| Processed fish                                         | 0,51(1,84)   | 0,68(1,89)        | 0,79(3)      |
| Sea delicatessen and canned fish                       | 1,85(3,88)   | 2,58(3,83)        | 3,67(10,21)  |
| <b>Sweet products</b>                                  |              |                   |              |
| Biscuits                                               | 1,09(2,95)   | 2,40(8,16)        | 1,17(2,26)   |
| Sweets                                                 | 3,17(5,26)   | 5,24(5,39)        | 4,88(6,35)   |
| Breakfast cereals                                      | 0,18(0,86)   | 0,32(1,27)        | 0,26(1,11)   |
| Breads, rusks and pastries                             | 1,78(4,90)   | 2,53(4,19)        | 3,56(9,43)   |
| Ice creams                                             | 0,58(1,84)   | 0,73(2,09)        | 0,71(2,39)   |
| <b>Salty products</b>                                  |              |                   |              |
| Prepared dishes                                        | 1,26(3,39)   | 2,06(6,4)         | 1,75(3,68)   |
| Pasta, rice, mashed potatoes and semolina              | 2,21(4,07)   | 4,68(9,44)        | 3,47(5,85)   |
| Savoury aperitif products                              | 0,44(1,40)   | 1,05(2,85)        | 0,66(1,79)   |
| Salads                                                 | 0,35(1,34)   | 0,40(1,53)        | 0,18(0,95)   |
| Soups                                                  | 0,49(2,21)   | 1,12(6,57)        | 1,08(7,57)   |
| Sauces and condiments                                  | 3,75(9,23)   | 3,86(4,47)        | 4,26(6,07)   |
| <b>Oils and fats</b>                                   | 4,43(9,22)   | 4,06(4,02)        | 3,92(4,04)   |
| <b>Beverages</b>                                       |              |                   |              |
| Waters                                                 | 8,95(14,68)  | 5,96(8,85)        | 8,71(16,74)  |
| Fruit juices                                           | 2,36(6,58)   | 1,52(5,77)        | 1,07(2,55)   |
| Sweetened drinks and sodas                             | 2,58(5,50)   | 4,48(6,51)        | 3,64(4,38)   |

Values correspond to mean (Standard deviation).

**Table S8** Percent contributions of food groups to nutrient intakes of the overall shopping cart

| Food groups                                            | Calories     |                   |              | Saturated Fatty Acids |                   |              |
|--------------------------------------------------------|--------------|-------------------|--------------|-----------------------|-------------------|--------------|
|                                                        | Nutri-Score  | Reference Intakes | No label     | Nutri-Score           | Reference Intakes | No label     |
| <b>Fruits, vegetables, legumes, grains and starchs</b> |              |                   |              |                       |                   |              |
| Fresh fruits                                           | 12,03(21,1)  | 2,76(4,93)        | 2,53(2,98)   | 5,64(21,07)           | 0,43(5,11)        | 0,12(0,29)   |
| Processed fruits                                       | 1,46(8,67)   | 0,31(0,91)        | 0,34(0,88)   | 0,92(8,48)            | 0,06(0,49)        | 0,05(0,15)   |
| Fresh vegetables                                       | 1,93(6,41)   | 2,48(3,77)        | 2,06(2,48)   | 0,82(7,1)             | 0,30(1,19)        | 0,15(0,24)   |
| Processed vegetables                                   | 0,92(2,29)   | 1,38(2,42)        | 1,18(3,18)   | 0,48(4,45)            | 0,43(1,60)        | 0,36(1,19)   |
| Legumes and potatoes                                   | 2,47(5,55)   | 5,15(8,23)        | 4,10(7,97)   | 0,39(2,42)            | 0,63(3,61)        | 0,78(5,35)   |
| Seeds and dried fruits                                 | 2,19(5,88)   | 2,33(5,16)        | 2,97(6,77)   | 1,49(4,68)            | 1,60(4,44)        | 1,87(6,25)   |
| <b>Oils and fats</b>                                   | 7,61(11,16)  | 8,01(8,74)        | 9,57(13,59)  | 10,79(16,63)          | 12,86(15,25)      | 14,02(18,27) |
| <b>Beverages</b>                                       | 5,38(9,19)   | 8,32(11,10)       | 9,81(10,39)  | 11,87(18,7)           | 19,59(21,72)      | 22,38(21,8)  |
| <b>Meat, fish and processed foods</b>                  |              |                   |              |                       |                   |              |
| Pre-packed meat                                        | 0,08(0,52)   | 0,20(1,20)        | 0,23(0,98)   | 0,1(0,81)             | 0,37(3,46)        | 0,37(1,85)   |
| Meat                                                   | 18,07(24,94) | 6,51(8,20)        | 7,63(12,95)  | 22,31(34,83)          | 6,99(12,52)       | 6,25(12,70)  |
| Processed meats                                        | 4,77(11,74)  | 3,68(7,20)        | 3,84(5,55)   | 5,66(15,52)           | 4,29(9,25)        | 4,65(9,43)   |
| Fresh fish                                             | 2,17(7,01)   | 2,2(6,38)         | 1,62(2,62)   | 1,69(8,35)            | 1,46(7,16)        | 0,67(1,69)   |
| Processed fish                                         | 0,38(1,58)   | 0,58(2,17)        | 0,63(2,16)   | 0,22(1,05)            | 0,45(3,01)        | 0,46(2,49)   |
| Sea delicatessen and canned fish                       | 1,92(5,13)   | 2,64(4,66)        | 3,51(10,18)  | 1,43(5,13)            | 1,85(4,58)        | 2,41(9,00)   |
| <b>Sweet products</b>                                  |              |                   |              |                       |                   |              |
| Biscuits                                               | 2,41(5,96)   | 4,77(11,63)       | 3,05(6,08)   | 2,23(6,55)            | 4,9(13,55)        | 2,75(6,73)   |
| Sweets                                                 | 5,54(10,11)  | 8,64(9,86)        | 8,42(10,7)   | 7,24(14,58)           | 11,47(16,33)      | 10,06(14,67) |
| Breakfast cereals                                      | 0,33(1,55)   | 0,66(2,51)        | 0,58(2,45)   | 0,10(0,54)            | 0,25(1,34)        | 0,15(0,77)   |
| Breads, rusks and pastries                             | 3,16(7,95)   | 4,28(6,62)        | 5,76(11,22)  | 0,94(3,49)            | 0,94(2,46)        | 2,09(10,59)  |
| Ice creams                                             | 0,50(1,58)   | 0,7(2,44)         | 0,65(2,83)   | 0,89(3,63)            | 1,10(4,07)        | 0,82(3,77)   |
| <b>Salty products</b>                                  |              |                   |              |                       |                   |              |
| Prepared dishes                                        | 1,44(3,66)   | 2,24(6,88)        | 2,22(4,84)   | 1,25(3,46)            | 2,07(7,24)        | 2,06(7,47)   |
| Pasta, rice, mashed potatoes and semolina              | 4,05(7,18)   | 8,37(13,13)       | 6,57(9,03)   | 0,86(3,79)            | 2,33(10,33)       | 1,10(3,15)   |
| Savoury aperitif products                              | 0,97(3,09)   | 2,30(5,50)        | 1,6(4,26)    | 0,43(1,82)            | 1,16(3,53)        | 0,76(2,21)   |
| Salads                                                 | 0,21(0,83)   | 0,25(1,06)        | 0,12(0,67)   | 0,08(0,34)            | 0,12(0,62)        | 0,04(0,22)   |
| Soups                                                  | 0,16(1,29)   | 0,57(5,53)        | 0,67(7,40)   | 0,15(1,35)            | 0,52(5,39)        | 0,61(7,41)   |
| Sauces and condiments                                  | 2,72(8,87)   | 1,94(3,23)        | 2,20(5,24)   | 1,90(8,97)            | 0,96(2,07)        | 1,14(4,45)   |
| <b>Oils and fats</b>                                   | 14,60(18,45) | 16,48(14,66)      | 16,68(15,00) | 19,52(25,10)          | 21,53(20,74)      | 22,84(21,77) |
| <b>Beverages</b>                                       |              |                   |              |                       |                   |              |
| Waters                                                 | 0(0,03)      | 0(0,03)           | 0(0,03)      | 0(0,05)               | 0(0,10)           | 0,01(0,11)   |
| Fruit juices                                           | 1,26(4,70)   | 0,63(5,25)        | 0,36(1,03)   | 0(0)                  | 0(0)              | 0(0)         |
| Sweetened drinks and sodas                             | 1,29(5,36)   | 1,62(4,61)        | 1,12(3,61)   | 0,62(3,36)            | 1,36(5,99)        | 1,04(4,14)   |

The relatively high contributions of calories and saturated fatty acids for fruits and vegetables in the Nutri-Score arm could be partly explained by participants having only fruits or vegetables in their shopping carts, thus increasing the overall contribution at the sample level, even though they are low in calories and saturated fatty acids.

**Table S9** Distribution of the products across the five Nutri-Score classes

| Nutri-Score | Nutri-Score     | Reference Intakes | No label        | P-value           | Nutri-Score vs no label |                      | Nutri-Score vs Reference Intakes |                      | Reference Intakes vs no label |                      |
|-------------|-----------------|-------------------|-----------------|-------------------|-------------------------|----------------------|----------------------------------|----------------------|-------------------------------|----------------------|
|             | Mean proportion | Mean proportion   | Mean proportion |                   | Difference <sup>a</sup> | P-value <sup>b</sup> | Difference <sup>a</sup>          | P-value <sup>b</sup> | Difference <sup>a</sup>       | P-value <sup>b</sup> |
| A           | 58.16±25.02     | 53.3±20.26        | 52.53±20.07     | <b>0.0004</b>     | 5.63(2.02;9.24)         | <b>0.0008</b>        | 4.85(1.24;8.47)                  | <b>0.005</b>         | 0.78(-2.86;4.41)              | 0.9                  |
| B           | 10.55±10.43     | 13.87±10.09       | 15.55±14.14     | <b>&lt;0.0001</b> | -5.01(-6.93;-3.08)      | <b>&lt;0.0001</b>    | -3.33(-5.26;-1.4)                | <b>0.0002</b>        | -1.68(-3.62;0.26)             | 0.1                  |
| C           | 15.60±19.08     | 12.14±10.82       | 11.52±11.2      | <b>&lt;0.0001</b> | 4.08(1.73;6.43)         | <b>0.0001</b>        | 3.46(1.10;5.81)                  | <b>0.002</b>         | 0.62(-1.74;2.99)              | 0.8                  |
| D           | 12.30±12.92     | 16.05±11.51       | 15.98±12.02     | <b>&lt;0.0001</b> | -3.68(-5.69;-1.68)      | <b>&lt;0.0001</b>    | -3.75(-5.76;-1.74)               | <b>&lt;0.0001</b>    | 0.06(-1.95;2.08)              | 1.0                  |
| E           | 3.40±5.69       | 4.63±8.57         | 4.42±5.42       | <b>0.02</b>       | -1.02(-2.12;0.08)       | 0.07                 | -1.23(-2.34;-0.13)               | <b>0.02</b>          | 0.21(-0.90;1.33)              | 0.9                  |

<sup>a</sup> Mean difference (95% Confidence Interval)

<sup>b</sup> P-value using Tukey's multiple comparisons tests. Boldface indicates statistical significance (p-value≤0.05). All products were taken into account, including also raw foods that were non-labelled.

1  
2  
3  
4  
5  
6  
7  
8  
9  
10  
11  
12  
13  
14  
15  
16  
17  
18  
19  
20  
21  
22  
23  
24  
25  
26  
27  
28  
29  
30  
31  
32  
33  
34  
35  
36  
37  
38  
39  
40  
41  
42  
43  
44  
45  
46  
47  
48  
49  
50  
51  
52  
53  
54  
55  
56  
57  
58  
59  
60

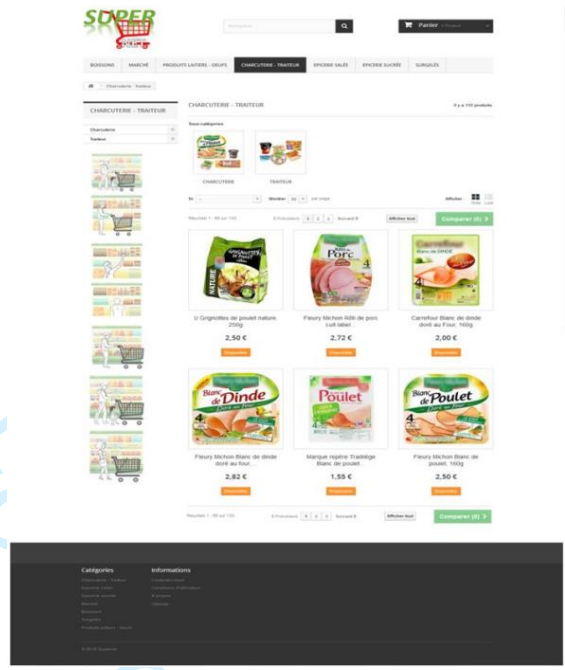

Figure S1 Screenshot of the experimental online supermarket

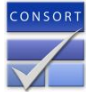

## CONSORT 2010 checklist of information to include when reporting a randomised trial\*

| Section/Topic                    | Item No | Checklist item                                                                                                                                                                              | Reported on page No |
|----------------------------------|---------|---------------------------------------------------------------------------------------------------------------------------------------------------------------------------------------------|---------------------|
| <b>Title and abstract</b>        |         |                                                                                                                                                                                             |                     |
|                                  | 1a      | Identification as a randomised trial in the title                                                                                                                                           | 1                   |
|                                  | 1b      | Structured summary of trial design, methods, results, and conclusions (for specific guidance see CONSORT for abstracts)                                                                     | 2                   |
| <b>Introduction</b>              |         |                                                                                                                                                                                             |                     |
| Background and objectives        | 2a      | Scientific background and explanation of rationale                                                                                                                                          | 3-4                 |
|                                  | 2b      | Specific objectives or hypotheses                                                                                                                                                           | 4                   |
| <b>Methods</b>                   |         |                                                                                                                                                                                             |                     |
| Trial design                     | 3a      | Description of trial design (such as parallel, factorial) including allocation ratio                                                                                                        | 4-5                 |
|                                  | 3b      | Important changes to methods after trial commencement (such as eligibility criteria), with reasons                                                                                          | NA                  |
| Participants                     | 4a      | Eligibility criteria for participants                                                                                                                                                       | 5                   |
|                                  | 4b      | Settings and locations where the data were collected                                                                                                                                        | 5                   |
| Interventions                    | 5       | The interventions for each group with sufficient details to allow replication, including how and when they were actually administered                                                       | 6-7                 |
| Outcomes                         | 6a      | Completely defined pre-specified primary and secondary outcome measures, including how and when they were assessed                                                                          | 8                   |
|                                  | 6b      | Any changes to trial outcomes after the trial commenced, with reasons                                                                                                                       | NA                  |
| Sample size                      | 7a      | How sample size was determined                                                                                                                                                              | 8                   |
|                                  | 7b      | When applicable, explanation of any interim analyses and stopping guidelines                                                                                                                | NA                  |
| <b>Randomisation:</b>            |         |                                                                                                                                                                                             |                     |
| Sequence generation              | 8a      | Method used to generate the random allocation sequence                                                                                                                                      | 5-6                 |
|                                  | 8b      | Type of randomisation; details of any restriction (such as blocking and block size)                                                                                                         | 5                   |
| Allocation concealment mechanism | 9       | Mechanism used to implement the random allocation sequence (such as sequentially numbered containers), describing any steps taken to conceal the sequence until interventions were assigned | NA                  |
| Implementation                   | 10      | Who generated the random allocation sequence, who enrolled participants, and who assigned participants to interventions                                                                     | 5                   |
| Blinding                         | 11a     | If done, who was blinded after assignment to interventions (for example, participants, care providers, those                                                                                | NA                  |

|    |                          |                                                                                                                     |          |
|----|--------------------------|---------------------------------------------------------------------------------------------------------------------|----------|
| 1  |                          | assessing outcomes) and how                                                                                         |          |
| 2  |                          | 11b If relevant, description of the similarity of interventions                                                     | NA       |
| 3  | Statistical methods      | 12a Statistical methods used to compare groups for primary and secondary outcomes                                   | 8-9      |
| 4  |                          | 12b Methods for additional analyses, such as subgroup analyses and adjusted analyses                                | 9        |
| 5  |                          |                                                                                                                     |          |
| 6  | <b>Results</b>           |                                                                                                                     |          |
| 7  | Participant flow (a      | 13a For each group, the numbers of participants who were randomly assigned, received intended treatment, and        | 9        |
| 8  | diagram is strongly      | were analysed for the primary outcome                                                                               |          |
| 9  | recommended)             | 13b For each group, losses and exclusions after randomisation, together with reasons                                | Figure 2 |
| 10 | Recruitment              | 14a Dates defining the periods of recruitment and follow-up                                                         | 4-5      |
| 11 |                          | 14b Why the trial ended or was stopped                                                                              | NA       |
| 12 | Baseline data            | 15 A table showing baseline demographic and clinical characteristics for each group                                 | Table 1  |
| 13 | Numbers analysed         | 16 For each group, number of participants (denominator) included in each analysis and whether the analysis was      | Figure 2 |
| 14 |                          | by original assigned groups                                                                                         |          |
| 15 | Outcomes and             | 17a For each primary and secondary outcome, results for each group, and the estimated effect size and its           | 12       |
| 16 | estimation               | precision (such as 95% confidence interval)                                                                         |          |
| 17 |                          | 17b For binary outcomes, presentation of both absolute and relative effect sizes is recommended                     | NA       |
| 18 | Ancillary analyses       | 18 Results of any other analyses performed, including subgroup analyses and adjusted analyses, distinguishing       | 14       |
| 19 |                          | pre-specified from exploratory                                                                                      |          |
| 20 | Harms                    | 19 All important harms or unintended effects in each group (for specific guidance see CONSORT for harms)            | NA       |
| 21 |                          |                                                                                                                     |          |
| 22 | <b>Discussion</b>        |                                                                                                                     |          |
| 23 | Limitations              | 20 Trial limitations, addressing sources of potential bias, imprecision, and, if relevant, multiplicity of analyses | 17       |
| 24 | Generalisability         | 21 Generalisability (external validity, applicability) of the trial findings                                        | 17       |
| 25 | Interpretation           | 22 Interpretation consistent with results, balancing benefits and harms, and considering other relevant evidence    | 15-17    |
| 26 |                          |                                                                                                                     |          |
| 27 | <b>Other information</b> |                                                                                                                     |          |
| 28 | Registration             | 23 Registration number and name of trial registry                                                                   | 5        |
| 29 | Protocol                 | 24 Where the full trial protocol can be accessed, if available                                                      | NA       |
| 30 | Funding                  | 25 Sources of funding and other support (such as supply of drugs), role of funders                                  | 19       |

36  
37 \*We strongly recommend reading this statement in conjunction with the CONSORT 2010 Explanation and Elaboration for important clarifications on all the items. If relevant, we also  
38 recommend reading CONSORT extensions for cluster randomised trials, non-inferiority and equivalence trials, non-pharmacological treatments, herbal interventions, and pragmatic trials.  
39 Additional extensions are forthcoming: for those and for up to date references relevant to this checklist, see [www.consort-statement.org](http://www.consort-statement.org).  
40  
41  
42
