# Supplementary material for: Impact of the Nutri-Score front-of-pack nutrition label on purchasing intentions of individuals with chronic diseases: results of a randomised trial
Source: PubMed Central journal article supplement — BMJ Open. 2022 Aug 29;12(8):e058139. doi: 10.1136/bmjopen-2021-058139 (PMC9438084; doi:10.1136/bmjopen-2021-058139), 2022-08-29
Supplement: bmjopen-2021-058139supp001.pdf [file bmjopen-2021-058139supp001.pdf]

**Table S1** Individual characteristics of respondents and non-respondents in the randomized controlled trial by randomization group, France, 2017

|                                                | Nutri-Score |                 | Reference Intakes |                 | No label    |                 | P <sup>a</sup> |
|------------------------------------------------|-------------|-----------------|-------------------|-----------------|-------------|-----------------|----------------|
|                                                | Respondents | Non-respondents | Respondents       | Non-respondents | Respondents | Non-respondents |                |
| <b>Total (n)</b>                               | 394         | 420             | 392               | 411             | 394         | 420             |                |
| <b>Sex, n(%)</b>                               |             |                 |                   |                 |             |                 | 0.5            |
| Men                                            | 131 (33.2)  | 158 (37.6)      | 124 (31.6)        | 143 (34.8)      | 152 (38.6)  | 157 (37.4)      |                |
| Women                                          | 263 (66.8)  | 262 (62.4)      | 268 (68.4)        | 268 (65.2)      | 242 (61.4)  | 263 (62.6)      |                |
| <b>Age, years</b>                              | 64.8 ± 6.9  | 65.8 ± 7.5      | 64.8 ± 7.3        | 66.5 ± 7.1      | 65.4 ± 7.1  | 66.2 ± 7.2      | 0.5            |
| <b>Educational level</b>                       |             |                 |                   |                 |             |                 | 0.2            |
| Primary                                        | 122 (31)    | 131 (31.2)      | 102 (26)          | 140 (34.1)      | 104 (26.4)  | 131 (31.2)      |                |
| Secondary                                      | 53 (13.5)   | 83 (19.8)       | 51 (13)           | 77 (18.7)       | 74 (18.8)   | 71 (16.9)       |                |
| University, undergraduate degree               | 103 (26.1)  | 94 (22.4)       | 122 (31.1)        | 98 (23.8)       | 99 (25.1)   | 103 (24.5)      |                |
| University, postgraduate degree                | 98 (24.9)   | 93 (22.1)       | 102 (26)          | 77 (18.7)       | 103 (26.1)  | 102 (24.3)      |                |
| Other                                          | 18 (4.6)    | 19 (4.5)        | 15 (3.8)          | 19 (4.6)        | 14 (3.6)    | 13 (3.1)        |                |
| <b>Grocery shopping frequency, n(%)</b>        |             |                 |                   |                 |             |                 | 0.6            |
| Always                                         | 231 (58.6)  | 235 (56)        | 252 (64.3)        | 229 (55.7)      | 239 (60.7)  | 245 (58.3)      |                |
| Often                                          | 122 (31)    | 134 (31.9)      | 107 (27.3)        | 128 (31.1)      | 113 (28.7)  | 127 (30.2)      |                |
| Sometimes                                      | 41 (10.4)   | 51 (12.1)       | 33 (8.4)          | 54 (13.1)       | 42 (10.7)   | 48 (11.4)       |                |
| <b>Online grocery shopping, yes n(%)</b>       | 119 (30.2)  | 96 (22.9)       | 129 (32.9)        | 102 (24.8)      | 103 (26.1)  | 109 (26)        | 0.2            |
| <b>Online grocery shopping frequency, n(%)</b> |             |                 |                   |                 |             |                 | 0.4            |
| At least one time per week                     | 16 (13.4)   | 8 (8.3)         | 20 (15.5)         | 14 (13.7)       | 21 (20.4)   | 13 (11.9)       |                |
| One or two times per month                     | 22 (18.5)   | 25 (26)         | 26 (20.2)         | 20 (19.6)       | 15 (14.6)   | 25 (22.9)       |                |
| One time every two or three months             | 29 (24.4)   | 15 (15.6)       | 33 (25.6)         | 23 (22.5)       | 17 (16.5)   | 22 (20.2)       |                |
| One or two times per year                      | 23 (19.3)   | 23 (24)         | 21 (16.3)         | 29 (28.4)       | 29 (28.2)   | 32 (29.4)       |                |
| Less than one time per year                    | 29 (24.4)   | 25 (26)         | 29 (22.5)         | 16 (15.7)       | 21 (20.4)   | 17 (15.6)       |                |
| <b>Weekly budget for grocery shopping (€)</b>  |             |                 |                   |                 |             |                 | 0.2            |
| < 30€                                          | 13 (3.3)    | 20 (4.8)        | 17 (4.3)          | 10 (2.4)        | 16 (4.1)    | 6 (1.4)         |                |
| 30 – 50€                                       | 76 (19.3)   | 65 (15.5)       | 74 (18.9)         | 78 (19)         | 63 (16)     | 65 (15.5)       |                |
| 50 – 100€                                      | 151 (38.3)  | 159 (37.9)      | 168 (42.9)        | 158 (38.4)      | 160 (40.6)  | 164 (39)        |                |
| > 100€                                         | 151 (38.3)  | 154 (36.7)      | 130 (33.2)        | 140 (34.1)      | 147 (37.3)  | 167 (39.8)      |                |
| Missing                                        | 3 (0.8)     | 22 (5.2)        | 3 (0.8)           | 25 (6.1)        | 8 (2)       | 18 (4.3)        |                |
| <b>Perceived nutritional knowledge, n(%)</b>   |             |                 |                   |                 |             |                 | 0.1            |
| High                                           | 38 (9.6)    | 33 (7.9)        | 38 (9.7)          | 26 (6.3)        | 22 (5.6)    | 44 (10.5)       |                |
| Intermediate                                   | 222 (56.3)  | 226 (53.8)      | 220 (56.1)        | 231 (56.2)      | 233 (59.1)  | 221 (52.6)      |                |
| Low                                            | 125 (31.7)  | 135 (32.1)      | 125 (31.9)        | 125 (30.4)      | 124 (31.5)  | 132 (31.4)      |                |
| No                                             | 9 (2.3)     | 9 (2.1)         | 7 (1.8)           | 7 (1.7)         | 9 (2.3)     | 6 (1.4)         |                |
| Missing data                                   | 0           | 17 (4)          | 2 (0.5)           | 22 (5.4)        | 6 (1.5)     | 17 (4)          |                |
| <b>Nutrition facts reading frequency, n(%)</b> |             |                 |                   |                 |             |                 | 0.3            |
| Always                                         | 63 (16)     | 68 (16.2)       | 55 (14)           | 58 (14.1)       | 54 (13.7)   | 71 (16.9)       |                |
| Often                                          | 202 (51.3)  | 190 (45.2)      | 199 (50.8)        | 210 (51.1)      | 206 (52.3)  | 177 (42.1)      |                |
| Sometimes                                      | 117 (29.7)  | 127 (30.2)      | 122 (31.1)        | 106 (25.8)      | 119 (30.2)  | 142 (33.8)      |                |
| Never                                          | 12 (3)      | 18 (4.3)        | 14 (3.6)          | 15 (3.6)        | 9 (2.3)     | 13 (3.1)        |                |
| Missing data                                   | 0           | 17 (4)          | 2 (0.5)           | 22 (5.4)        | 6 (1.5)     | 17 (4)          |                |

Values are mean ± standard deviation or n (%) as appropriate.

<sup>a</sup> A multivariable logistic regression was conducted to model the probability of non-response depending on the individual sociodemographic and lifestyle characteristics and the arm of randomization. The P corresponds to the p-value of the interaction term between the individual characteristic and the trial arm. The comparison of the educational level and weekly budget for grocery shopping variables between respondents and non-respondents were not performed given that information was missing for non-respondents.

**Table S2** Overall nutritional quality, energy and nutrient content for 100g of the shopping cart among labelled products only

|                                                   | Nutri-Score     | Reference Intakes | No label       | P-value           | Nutri-Score vs no label | Nutri-Score vs Reference Intakes | Reference Intakes vs no label | P-value <sup>b</sup> | P-value <sup>b</sup> | P-value <sup>b</sup> |
|---------------------------------------------------|-----------------|-------------------|----------------|-------------------|-------------------------|----------------------------------|-------------------------------|----------------------|----------------------|----------------------|
|                                                   | N=369           | N=390             | N=392          |                   | Difference <sup>a</sup> | Difference <sup>a</sup>          | Difference <sup>a</sup>       |                      |                      |                      |
| Overall nutritional quality (FSAm-NPS score/100g) | 4.35 (3.5)      | 4.27 (3.43)       | 4.49 (3.41)    | 0.7               | -0.13 (-0.72;0.45)      | 0.9                              | 0.08 (-0.51;0.67)             | 0.9                  | -0.21 (-0.79;0.36)   | 0.7                  |
| Calories (kcal/100g)                              | 188.42 (111.64) | 237.94 (80.74)    | 226.59 (85.24) | <b>&lt;0.0001</b> | -38.16 (-54.02;-22.3)   | <b>&lt;0.0001</b>                | -49.52 (-65.39;-33.64)        | <b>&lt;0.0001</b>    | 11.35 (-4.28;26.99)  | 0.2                  |
| Saturated fatty acids (g/100g)                    | 4.60 (4.48)     | 5.34 (2.97)       | 5.43 (3.28)    | <b>0.003</b>      | -0.83 (-1.45;-0.22)     | <b>0.004</b>                     | -0.74 (-1.36;-0.13)           | <b>0.01</b>          | -0.09 (-0.70;0.52)   | 0.9                  |
| Sugars (g/100)                                    | 5.80 (5.16)     | 6.45 (4.23)       | 6.43 (6.00)    | 0.1               | -0.63 (-1.51;0.25)      | 0.2                              | -0.66 (-1.54;0.23)            | 0.2                  | 0.03 (-0.84;0.9)     | 1.0                  |
| Sodium (mg/100g)                                  | 267.67 (284.89) | 252.19 (130.25)   | 267.10 (200.7) |                   |                         |                                  |                               |                      |                      |                      |
| Fiber (g/100g)                                    | 1.45 (1.56)     | 2.27 (1.74)       | 1.95 (1.54)    |                   |                         |                                  |                               |                      |                      |                      |
| Fruits and vegetables (%)                         | 17.98 (20.94)   | 17.48 (13.99)     | 16.95 (12.61)  |                   |                         |                                  |                               |                      |                      |                      |
| Proteins (g/100g)                                 | 6.35 (4.31)     | 7.89 (2.87)       | 7.99 (3.92)    |                   |                         |                                  |                               |                      |                      |                      |

<sup>a</sup> Mean difference (95% Confidence Interval)

<sup>b</sup> P-value using Tukey's multiple comparisons tests. Boldface indicates statistical significance (p-value≤0.05). FSAm-NPS: modified Food Standards Agency Nutrient Profiling System.

**Table S3** Sensitivity analyses: overall nutritional quality, energy and nutrient content for 100g of the shopping cart excluding outliers on the spending amount

|                                                   | Nutri-Score     | Reference Intakes | No label       | P-value           | Nutri-Score vs no label | Nutri-Score vs Reference Intakes | Reference Intakes vs no label | P-value <sup>b</sup> | P-value <sup>b</sup> | P-value <sup>b</sup> |
|---------------------------------------------------|-----------------|-------------------|----------------|-------------------|-------------------------|----------------------------------|-------------------------------|----------------------|----------------------|----------------------|
|                                                   | N=351           | N=354             | N=357          |                   | Difference <sup>a</sup> | Difference <sup>a</sup>          | Difference <sup>a</sup>       |                      |                      |                      |
| Overall nutritional quality (FSAm-NPS score/100g) | 0.99 (3.30)     | 1.69 (2.84)       | 1.8 (2.58)     | <b>0.0004</b>     | -0.81 (-1.32;-0.29)     | <b>0.0007</b>                    | -0.69 (-1.21;-0.17)           | <b>0.005</b>         | -0.12 (-0.63;0.40)   | 0.9                  |
| Calories (kcal/100g)                              | 152.06 (74.84)  | 180.89 (58.10)    | 173.53 (57.8)  | <b>&lt;0.0001</b> | -21.47 (-32.77;-10.17)  | <b>&lt;0.0001</b>                | -28.83 (-40.15;-17.51)        | <b>&lt;0.0001</b>    | 7.36 (-3.91;18.63)   | 0.3                  |
| Saturated fatty acids (g/100g)                    | 3.19 (2.73)     | 3.76 (2.02)       | 3.78 (2.03)    | <b>0.0005</b>     | -0.59 (-0.99;-0.18)     | <b>0.002</b>                     | -0.58 (-0.98;-0.17)           | <b>0.002</b>         | -0.01 (-0.41;0.39)   | 1.0                  |
| Sugars (g/100)                                    | 5.9 (3.31)      | 5.79 (2.93)       | 5.61 (3.10)    | 0.5               | 0.29 (-0.26;0.84)       | 0.4                              | 0.11 (-0.44;0.66)             | 0.9                  | 0.18 (-0.36;0.73)    | 0.7                  |
| Sodium (mg/100g)                                  | 171.75 (144.16) | 193.37 (96.17)    | 205.5 (143.31) |                   |                         |                                  |                               |                      |                      |                      |
| Fiber (g/100g)                                    | 1.41 (1.01)     | 1.91 (1.17)       | 1.67 (0.96)    |                   |                         |                                  |                               |                      |                      |                      |
| Fruits and vegetables (%)                         | 35.29 (22.57)   | 30.66 (14.69)     | 30.11 (13.93)  |                   |                         |                                  |                               |                      |                      |                      |
| Proteins (g/100g)                                 | 7.30 (3.25)     | 7.25 (2.03)       | 7.53 (2.92)    |                   |                         |                                  |                               |                      |                      |                      |

<sup>a</sup> Mean difference (95% Confidence Interval)

<sup>b</sup> P-value using Tukey's multiple comparisons tests. Boldface indicates statistical significance (p-value≤0.05). Participants whose spending amount was below the 5<sup>th</sup> or over the 95<sup>th</sup> percentile of the distribution of the cost of the shopping carts in the sample were excluded. FSAm-NPS: modified Food Standards Agency Nutrient Profiling System.

**Table S4** Sensitivity analyses using multiple imputations: overall nutritional quality, energy and nutrient content for 100g of the shopping cart

|                                                   | Nutri-Score     | Reference Intakes | No label        | P-value       | Nutri-Score vs no label | Nutri-Score vs Reference Intakes | Reference Intakes vs no label |                      |                         |                      |
|---------------------------------------------------|-----------------|-------------------|-----------------|---------------|-------------------------|----------------------------------|-------------------------------|----------------------|-------------------------|----------------------|
|                                                   | N=814           | N=803             | N=814           |               | Difference <sup>a</sup> | P-value <sup>b</sup>             | Difference <sup>a</sup>       | P-value <sup>b</sup> | Difference <sup>a</sup> | P-value <sup>b</sup> |
| Overall nutritional quality (FSAm-NPS score/100g) | 1.51 (1.87)     | 1.78 (1.87)       | 1.84 (2.04)     | 0.1           | -0.33 (-0.69;0.03)      | 0.07                             | -0.27 (-0.63;0.08)            | 0.1                  | -0.06 (-0.43;0.32)      | 0.8                  |
| Calories (kcal/100g)                              | 162.95 (41.32)  | 177.21 (39.24)    | 173.24 (44.67)  | <b>0.0009</b> | -10.28 (-18.26;2.31)    | <b>0.01</b>                      | -14.26 (-21.87;6.65)          | <b>0.0003</b>        | 3.98 (-4.09;12.05)      | 0.3                  |
| Saturated fatty acids (g/100g)                    | 3.43 (1.62)     | 3.68 (1.41)       | 3.70 (1.64)     | 0.1           | -0.27 (-0.56;0.02)      | 0.07                             | -0.25 (-0.54;0.04)            | 0.1                  | -0.02 (-0.32;0.28)      | 0.9                  |
| Sugars (g/100)                                    | 5.86 (2.11)     | 5.86 (2.02)       | 5.74 (2.22)     | 0.6           | 0.12 (-0.32;0.55)       | 0.6                              | -0.01 (-0.46;0.45)            | 1.0                  | 0.12 (-0.30;0.54)       | 0.6                  |
| Sodium (mg/100g)                                  | 194.73 (102.46) | 196.38 (97.05)    | 205.54 (113.03) |               |                         |                                  |                               |                      |                         |                      |
| Fiber (g/100g)                                    | 1.51 (0.62)     | 1.76 (0.64)       | 1.64 (0.68)     |               |                         |                                  |                               |                      |                         |                      |
| Fruits and vegetables (%)                         | 32.25 (10.94)   | 30.12 (10.35)     | 29.78 (11.19)   |               |                         |                                  |                               |                      |                         |                      |
| Proteins (g/100g)                                 | 7.41 (1.73)     | 7.35 (1.86)       | 7.48 (1.97)     |               |                         |                                  |                               |                      |                         |                      |

<sup>a</sup> Mean difference (95% Confidence Interval)<sup>b</sup> P-value using Tukey's multiple comparisons tests. Boldface indicates statistical significance (p-value≤0.05). FSAm-NPS: modified Food Standards Agency Nutrient Profiling System.**Table S5** Sensitivity analyses using multiple imputations: overall nutritional quality, energy and nutrient content for 100g of the shopping cart among labelled products only

|                                              | Nutri-Score     | Reference Intakes | No label        | P-value      | Nutri-Score vs no label | Nutri-Score vs Reference Intakes | Reference Intakes vs no label |                      |                         |                      |
|----------------------------------------------|-----------------|-------------------|-----------------|--------------|-------------------------|----------------------------------|-------------------------------|----------------------|-------------------------|----------------------|
|                                              | N=789           | N=801             | N=812           |              | Difference <sup>a</sup> | P-value <sup>b</sup>             | Difference <sup>a</sup>       | P-value <sup>b</sup> | Difference <sup>a</sup> | P-value <sup>b</sup> |
| Overall nutritional quality (FSA score/100g) | 3.51 (11.8)     | 3.52 (11.82)      | 3.61 (11.53)    | 0.6          | -0.10 (-0.57;0.36)      | 0.7                              | -0.01 (-0.46;0.43)            | 1.0                  | -0.09 (-0.53;0.35)      | 0.7                  |
| Calories (kcal/100g)                         | 176.66 (343.52) | 201.81 (344.94)   | 195.53 (330.17) | <b>0.001</b> | -18.87 (-31.27;-6.5)    | <b>0.003</b>                     | -25.15 (-38.22;-12.09)        | <b>0.0002</b>        | -6.29 (-5.17;17.74)     | 0.3                  |
| Saturated fatty acids (g/100g)               | 3.97 (14.84)    | 4.34 (15.04)      | 4.37 (14.67)    | 0.2          | -0.41 (-0.88;0.06)      | 0.09                             | -0.38 (-0.88;0.12)            | 0.1                  | -0.03 (-0.47;0.41)      | 0.9                  |
| Sugars (g/100)                               | 4.64 (19.27)    | 4.99 (19.48)      | 4.96 (19.33)    | 0.5          | -0.32 (-0.97;0.33)      | 0.3                              | -0.35 (-0.97;0.28)            | 0.3                  | 0.02 (-0.63;0.68)       | 0.9                  |
| Sodium (mg/100g)                             | 220.7 (688.19)  | 216.53 (675.15)   | 221.69 (672.91) |              |                         |                                  |                               |                      |                         |                      |
| Fiber (g/100g)                               | 1.43 (5.42)     | 1.83 (5.44)       | 1.68 (5.27)     |              |                         |                                  |                               |                      |                         |                      |
| Fruits and vegetables (%)                    | 16.76 (50.37)   | 16.55 (50.69)     | 16.43 (49.19)   |              |                         |                                  |                               |                      |                         |                      |
| Proteins (g/100g)                            | 6.12 (14.32)    | 6.86 (13.06)      | 6.89 (12.84)    |              |                         |                                  |                               |                      |                         |                      |

<sup>a</sup> Mean difference (95% Confidence Interval)<sup>b</sup> P-value using Tukey's multiple comparisons tests. Boldface indicates statistical significance (p-value≤0.05). FSAm-NPS: modified Food Standards Agency Nutrient Profiling System.

**Table S6** Total quantities of calories and nutrients in the shopping carts purchased in the three arms of the trial

|                           | <b>Nutri-Score</b> | <b>Reference Intakes</b> | <b>No label</b>  | <b>P-value</b>    | <b>Nutri-Score vs no label</b> |                            | <b>Nutri-Score vs Reference Intakes</b> |                            | <b>Reference Intakes vs no label</b> |                            |
|---------------------------|--------------------|--------------------------|------------------|-------------------|--------------------------------|----------------------------|-----------------------------------------|----------------------------|--------------------------------------|----------------------------|
|                           | <b>Mean (SD)</b>   | <b>Mean (SD)</b>         | <b>Mean (SD)</b> |                   | <b>Difference<sup>a</sup></b>  | <b>P-value<sup>b</sup></b> | <b>Difference<sup>a</sup></b>           | <b>P-value<sup>b</sup></b> | <b>Difference<sup>a</sup></b>        | <b>P-value<sup>b</sup></b> |
| Calories (kcal)           | 2229.74(2336.45)   | 3395.80(2232.5)          | 3173.73(2235.09) | <b>&lt;0.0001</b> | -943.99(-1323.29;-564.7)       | <b>&lt;0.0001</b>          | -1166.06(-1545.84;-786.29)              | <b>&lt;0.0001</b>          | 222.07(-157.71;601.85)               | 0.4                        |
| Saturated fatty acids (g) | 35.88(40.21)       | 53.08(37.21)             | 52.60(38.35)     | <b>&lt;0.0001</b> | -16.72(-23.18;-10.27)          | <b>&lt;0.0001</b>          | -17.20(-23.66;-10.73)                   | <b>&lt;0.0001</b>          | 0.47(-5.99;6.94)                     | 1.0                        |
| Sugars (g)                | 78.09(71.76)       | 116.70(90.74)            | 103.08(79.66)    | <b>&lt;0.0001</b> | -24.99(-38.54;-11.43)          | <b>&lt;0.0001</b>          | -38.60(-52.17;-25.03)                   | <b>&lt;0.0001</b>          | 13.61(0.04;27.19)                    | <b>0.05</b>                |
| Sodium (mg)               | 1914.81(2121.69)   | 2875.46(2298.01)         | 2803.92(2232.81) | <b>&lt;0.0001</b> | -889.11(-1260.04;-518.19)      | <b>&lt;0.0001</b>          | -960.66(-1332.06;-589.26)               | <b>&lt;0.0001</b>          | 71.54(-299.86;442.95)                | 0.9                        |
| Fiber (g)                 | 17.13(17.45)       | 29.81(21.11)             | 26.17(20.05)     | <b>&lt;0.0001</b> | -9.04(-12.32;-5.76)            | <b>&lt;0.0001</b>          | -12.68(-15.96;-9.4)                     | <b>&lt;0.0001</b>          | 3.64(0.36;6.92)                      | <b>0.03</b>                |
| Proteins (g)              | 98.66(92.33)       | 145.51(93.35)            | 142.44(94.72)    | <b>&lt;0.0001</b> | -43.78(-59.41;-28.15)          | <b>&lt;0.0001</b>          | -46.85(-62.5;-31.2)                     | <b>&lt;0.0001</b>          | 3.07(-12.58;18.72)                   | 0.9                        |

<sup>a</sup> Mean difference (95% Confidence Interval)

<sup>b</sup> P-value using Tukey's multiple comparisons tests. Boldface indicates statistical significance (p-value≤0.05). SD: Standard Deviation

**Table S7** Percentage of the number of products in the shopping cart from the different food categories

| <b>Food groups</b>                                     | <b>Nutri-Score</b> | <b>Reference Intakes</b> | <b>No label</b> |
|--------------------------------------------------------|--------------------|--------------------------|-----------------|
| <b>Fruits, vegetables, legumes, grains and starchs</b> |                    |                          |                 |
| Fresh fruits                                           | 17,69(22,1)        | 7,14(6,76)               | 7,07(6,68)      |
| Processed fruits                                       | 1,96(8,99)         | 0,73(1,72)               | 0,82(2,05)      |
| Fresh vegetables                                       | 6,13(10,74)        | 10,76(9,87)              | 9,73(8,82)      |
| Processed vegetables                                   | 2,79(5,09)         | 4,22(5,14)               | 3,43(4,69)      |
| Legumes and potatoes                                   | 1,50(3,45)         | 3,08(4,64)               | 2,49(5,28)      |
| Seeds and dried fruits                                 | 0,81(2,44)         | 0,83(1,82)               | 1,08(3,14)      |
| <b>Dairy products</b>                                  | 10,25(11,77)       | 12,46(10,36)             | 13,33(14,06)    |
| <b>Cheeses</b>                                         | 2,96(5,01)         | 4,84(7,39)               | 5,17(6,15)      |
| <b>Meat, fish and processed foods</b>                  |                    |                          |                 |
| Pre-packed meat                                        | 0,11(0,68)         | 0,20(0,99)               | 0,21(0,83)      |
| Meat                                                   | 12,52(14,99)       | 6,02(6,04)               | 6,94(10,14)     |
| Processed meats                                        | 4,64(11,25)        | 3,35(4,93)               | 3,5(5,25)       |
| Fresh fish                                             | 2,66(6,6)          | 2,71(5,94)               | 2,44(3,51)      |
| Processed fish                                         | 0,51(1,84)         | 0,68(1,89)               | 0,79(3)         |
| Sea delicatessen and canned fish                       | 1,85(3,88)         | 2,58(3,83)               | 3,67(10,21)     |
| <b>Sweet products</b>                                  |                    |                          |                 |
| Biscuits                                               | 1,09(2,95)         | 2,40(8,16)               | 1,17(2,26)      |
| Sweets                                                 | 3,17(5,26)         | 5,24(5,39)               | 4,88(6,35)      |
| Breakfast cereals                                      | 0,18(0,86)         | 0,32(1,27)               | 0,26(1,11)      |
| Breads, rusks and pastries                             | 1,78(4,90)         | 2,53(4,19)               | 3,56(9,43)      |
| Ice creams                                             | 0,58(1,84)         | 0,73(2,09)               | 0,71(2,39)      |
| <b>Salty products</b>                                  |                    |                          |                 |
| Prepared dishes                                        | 1,26(3,39)         | 2,06(6,4)                | 1,75(3,68)      |
| Pasta, rice, mashed potatoes and semolina              | 2,21(4,07)         | 4,68(9,44)               | 3,47(5,85)      |
| Savoury aperitif products                              | 0,44(1,40)         | 1,05(2,85)               | 0,66(1,79)      |
| Salads                                                 | 0,35(1,34)         | 0,40(1,53)               | 0,18(0,95)      |
| Soups                                                  | 0,49(2,21)         | 1,12(6,57)               | 1,08(7,57)      |
| Sauces and condiments                                  | 3,75(9,23)         | 3,86(4,47)               | 4,26(6,07)      |
| <b>Oils and fats</b>                                   | 4,43(9,22)         | 4,06(4,02)               | 3,92(4,04)      |
| <b>Beverages</b>                                       |                    |                          |                 |
| Waters                                                 | 8,95(14,68)        | 5,96(8,85)               | 8,71(16,74)     |
| Fruit juices                                           | 2,36(6,58)         | 1,52(5,77)               | 1,07(2,55)      |
| Sweetened drinks and sodas                             | 2,58(5,50)         | 4,48(6,51)               | 3,64(4,38)      |

Values correspond to mean (Standard deviation).

**Table S8** Percent contributions of food groups to nutrient intakes of the overall shopping cart

| Food groups                                             | Calories     |                   |              | Saturated Fatty Acids |                   |              |
|---------------------------------------------------------|--------------|-------------------|--------------|-----------------------|-------------------|--------------|
|                                                         | Nutri-Score  | Reference Intakes | No label     | Nutri-Score           | Reference Intakes | No label     |
| <b>Fruits, vegetables, legumes, grains and starches</b> |              |                   |              |                       |                   |              |
| Fresh fruits                                            | 12,03(21,1)  | 2,76(4,93)        | 2,53(2,98)   | 5,64(21,07)           | 0,43(5,11)        | 0,12(0,29)   |
| Processed fruits                                        | 1,46(8,67)   | 0,31(0,91)        | 0,34(0,88)   | 0,92(8,48)            | 0,06(0,49)        | 0,05(0,15)   |
| Fresh vegetables                                        | 1,93(6,41)   | 2,48(3,77)        | 2,06(2,48)   | 0,82(7,1)             | 0,30(1,19)        | 0,15(0,24)   |
| Processed vegetables                                    | 0,92(2,29)   | 1,38(2,42)        | 1,18(3,18)   | 0,48(4,45)            | 0,43(1,60)        | 0,36(1,19)   |
| Legumes and potatoes                                    | 2,47(5,55)   | 5,15(8,23)        | 4,10(7,97)   | 0,39(2,42)            | 0,63(3,61)        | 0,78(5,35)   |
| Seeds and dried fruits                                  | 2,19(5,88)   | 2,33(5,16)        | 2,97(6,77)   | 1,49(4,68)            | 1,60(4,44)        | 1,87(6,25)   |
| <b>Oils and fats</b>                                    | 7,61(11,16)  | 8,01(8,74)        | 9,57(13,59)  | 10,79(16,63)          | 12,86(15,25)      | 14,02(18,27) |
| <b>Beverages</b>                                        | 5,38(9,19)   | 8,32(11,10)       | 9,81(10,39)  | 11,87(18,7)           | 19,59(21,72)      | 22,38(21,8)  |
| <b>Meat, fish and processed foods</b>                   |              |                   |              |                       |                   |              |
| Pre-packed meat                                         | 0,08(0,52)   | 0,20(1,20)        | 0,23(0,98)   | 0,1(0,81)             | 0,37(3,46)        | 0,37(1,85)   |
| Meat                                                    | 18,07(24,94) | 6,51(8,20)        | 7,63(12,95)  | 22,31(34,83)          | 6,99(12,52)       | 6,25(12,70)  |
| Processed meats                                         | 4,77(11,74)  | 3,68(7,20)        | 3,84(5,55)   | 5,66(15,52)           | 4,29(9,25)        | 4,65(9,43)   |
| Fresh fish                                              | 2,17(7,01)   | 2,2(6,38)         | 1,62(2,62)   | 1,69(8,35)            | 1,46(7,16)        | 0,67(1,69)   |
| Processed fish                                          | 0,38(1,58)   | 0,58(2,17)        | 0,63(2,16)   | 0,22(1,05)            | 0,45(3,01)        | 0,46(2,49)   |
| Sea delicatessen and canned fish                        | 1,92(5,13)   | 2,64(4,66)        | 3,51(10,18)  | 1,43(5,13)            | 1,85(4,58)        | 2,41(9,00)   |
| <b>Sweet products</b>                                   |              |                   |              |                       |                   |              |
| Biscuits                                                | 2,41(5,96)   | 4,77(11,63)       | 3,05(6,08)   | 2,23(6,55)            | 4,9(13,55)        | 2,75(6,73)   |
| Sweets                                                  | 5,54(10,11)  | 8,64(9,86)        | 8,42(10,7)   | 7,24(14,58)           | 11,47(16,33)      | 10,06(14,67) |
| Breakfast cereals                                       | 0,33(1,55)   | 0,66(2,51)        | 0,58(2,45)   | 0,10(0,54)            | 0,25(1,34)        | 0,15(0,77)   |
| Breads, rusks and pastries                              | 3,16(7,95)   | 4,28(6,62)        | 5,76(11,22)  | 0,94(3,49)            | 0,94(2,46)        | 2,09(10,59)  |
| Ice creams                                              | 0,50(1,58)   | 0,7(2,44)         | 0,65(2,83)   | 0,89(3,63)            | 1,10(4,07)        | 0,82(3,77)   |
| <b>Salty products</b>                                   |              |                   |              |                       |                   |              |
| Prepared dishes                                         | 1,44(3,66)   | 2,24(6,88)        | 2,22(4,84)   | 1,25(3,46)            | 2,07(7,24)        | 2,06(7,47)   |
| Pasta, rice, mashed potatoes and semolina               | 4,05(7,18)   | 8,37(13,13)       | 6,57(9,03)   | 0,86(3,79)            | 2,33(10,33)       | 1,10(3,15)   |
| Savoury aperitif products                               | 0,97(3,09)   | 2,30(5,50)        | 1,6(4,26)    | 0,43(1,82)            | 1,16(3,53)        | 0,76(2,21)   |
| Salads                                                  | 0,21(0,83)   | 0,25(1,06)        | 0,12(0,67)   | 0,08(0,34)            | 0,12(0,62)        | 0,04(0,22)   |
| Soups                                                   | 0,16(1,29)   | 0,57(5,53)        | 0,67(7,40)   | 0,15(1,35)            | 0,52(5,39)        | 0,61(7,41)   |
| Sauces and condiments                                   | 2,72(8,87)   | 1,94(3,23)        | 2,20(5,24)   | 1,90(8,97)            | 0,96(2,07)        | 1,14(4,45)   |
| <b>Oils and fats</b>                                    | 14,60(18,45) | 16,48(14,66)      | 16,68(15,00) | 19,52(25,10)          | 21,53(20,74)      | 22,84(21,77) |
| <b>Beverages</b>                                        |              |                   |              |                       |                   |              |
| Waters                                                  | 0(0,03)      | 0(0,03)           | 0(0,03)      | 0(0,05)               | 0(0,10)           | 0,01(0,11)   |
| Fruit juices                                            | 1,26(4,70)   | 0,63(5,25)        | 0,36(1,03)   | 0(0)                  | 0(0)              | 0(0)         |
| Sweetened drinks and sodas                              | 1,29(5,36)   | 1,62(4,61)        | 1,12(3,61)   | 0,62(3,36)            | 1,36(5,99)        | 1,04(4,14)   |

The relatively high contributions of calories and saturated fatty acids for fruits and vegetables in the Nutri-Score arm could be partly explained by participants having only fruits or vegetables in their shopping carts, thus increasing the overall contribution at the sample level, even though they are low in calories and saturated fatty acids.

**Table S9** Distribution of the products across the five Nutri-Score classes

| Nutri-Score | Nutri-Score     | Reference Intakes | No label        | P-value           | Nutri-Score vs no label |                      | Nutri-Score vs Reference Intakes |                      | Reference Intakes vs no label |                      |
|-------------|-----------------|-------------------|-----------------|-------------------|-------------------------|----------------------|----------------------------------|----------------------|-------------------------------|----------------------|
|             | Mean proportion | Mean proportion   | Mean proportion |                   | Difference <sup>a</sup> | P-value <sup>b</sup> | Difference <sup>a</sup>          | P-value <sup>b</sup> | Difference <sup>a</sup>       | P-value <sup>b</sup> |
| A           | 58.16±25.02     | 53.3±20.26        | 52.53±20.07     | <b>0.0004</b>     | 5.63(2.02;9.24)         | <b>0.0008</b>        | 4.85(1.24;8.47)                  | <b>0.005</b>         | 0.78(-2.86;4.41)              | 0.9                  |
| B           | 10.55±10.43     | 13.87±10.09       | 15.55±14.14     | <b>&lt;0.0001</b> | -5.01(-6.93;-3.08)      | <b>&lt;0.0001</b>    | -3.33(-5.26;-1.4)                | <b>0.0002</b>        | -1.68(-3.62;0.26)             | 0.1                  |
| C           | 15.60±19.08     | 12.14±10.82       | 11.52±11.2      | <b>&lt;0.0001</b> | 4.08(1.73;6.43)         | <b>0.0001</b>        | 3.46(1.10;5.81)                  | <b>0.002</b>         | 0.62(-1.74;2.99)              | 0.8                  |
| D           | 12.30±12.92     | 16.05±11.51       | 15.98±12.02     | <b>&lt;0.0001</b> | -3.68(-5.69;-1.68)      | <b>&lt;0.0001</b>    | -3.75(-5.76;-1.74)               | <b>&lt;0.0001</b>    | 0.06(-1.95;2.08)              | 1.0                  |
| E           | 3.40±5.69       | 4.63±8.57         | 4.42±5.42       | <b>0.02</b>       | -1.02(-2.12;0.08)       | 0.07                 | -1.23(-2.34;-0.13)               | <b>0.02</b>          | 0.21(-0.90;1.33)              | 0.9                  |

<sup>a</sup> Mean difference (95% Confidence Interval)

<sup>b</sup> P-value using Tukey's multiple comparisons tests. Boldface indicates statistical significance (p-value≤0.05). All products were taken into account, including also raw foods that were non-labelled.

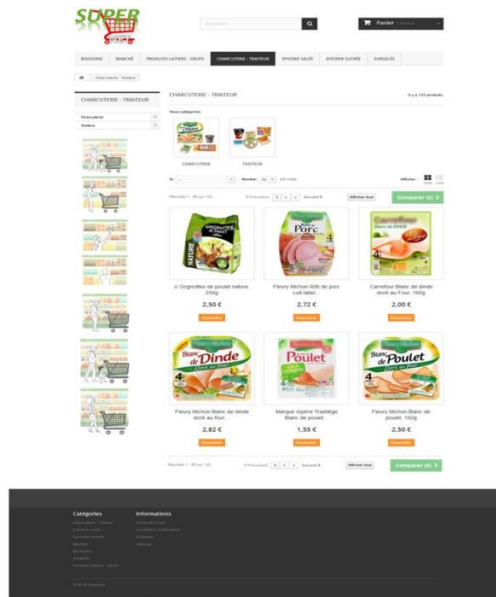

Figure S1 Screenshot of the experimental online supermarket
